# Supplementary material for: Oleic Acid Protects Caenorhabditis Mothers From Mating-Induced Death and the Cost of Reproduction
Source: Front Cell Dev Biol. 2021 Jun 11;9:690373. doi: 10.3389/fcell.2021.690373 (PMC8226236; doi:10.3389/fcell.2021.690373)
Supplement: Supplementary Table 2 — Mating-induced differentially expressed genes identified by one-class SAM analysis. [file Table_2.XLSX]

## Sheet: ctrl
Significant Pos
Row	Gene ID	Gene Name	Score(d)	Numerator(r)	Denominator(s+s0)	q-value(%)	Gene Description
18609	col-74	ZK1248.2	30.4735871152164	5.9325	0.194676786082651	0	col-74 is an ortholog of human COLQ (collagen-like tail subunit (single strand of homotrimer) of asymmetric acetylcholinesterase) and COL9A3 (collagen, type IX, alpha 3); col-74 is a structural constituent of cuticle, based on protein domain information.
10742	K10D3.4	K10D3.4	28.430920196973	4.3875	0.154321420819405	0	K10D3.4 is an ortholog of human AMBP (alpha-1-microglobulin/bikunin precursor), LRP11 (low density lipoprotein receptor-related protein 11) and members of the WFDC (WAP four-disulfide core domain containing) family including WFIKKN1; K10D3.4 is predicted to have serine-type endopeptidase inhibitor activity, based on protein domain information.
9497	F59C12.4	F59C12.4	27.7730879513679	3.085	0.11107875384264	0	None
9811	H29C22.1	H29C22.1	27.0737773684765	5.1525	0.190313303159512	0	None
560	hil-7	C01B10.5	26.2492374467199	4.9175	0.187338775458961	0	hil-7 encodes an H1 linker histone.
11023	dao-2	M03A1.7	26.2311913930489	5.795	0.220920198139976	0	dao-2 encodes a (putatively) secreted protein with a DB module; dao-2 is down-regulated in daf-2 mutant adults by comparison with normal adults, and thus may be involved in dauer formation.
18191	hhat-1	ZC101.3	26.165378059733	5.415	0.206952866785952	0	hhat-1 encodes a putative protein-cysteine N-palmitoyltransferase ('hedgehog acyltransferase') orthologous to human HHAT (OMIM: 605743) and GUP1 (OMIM:608116), and paralogous to HHAT-2; since C. elegans has no HEDGEHOG homolog, the substrate and function of HHAT-1 in vivo are unclear.
4982	F09F9.2	F09F9.2	26.0364547959723	4.9175	0.188869799614989	0	None
14493	oac-51	W03B1.7	24.2807496012534	4.2775	0.176168366720407	0	oac-51 is predicted to have transferase activity, transferring acyl groups other than amino-acyl groups, based on protein domain information.
708	C02E7.6	C02E7.6	24.1669745451696	4.3275	0.179066684243475	0	None
2385	C27A7.8	C27A7.8	23.4531933502389	4.0375	0.172151397027513	0	None
9086	col-121	F56D5.1	23.3723761500675	3.3425	0.143010705395923	0	col-121 encodes a cuticle collagen required for resistance to the endocrine disrupting chemical bisphenol A (BPA); col-121(nx3) and col-121(RNAi) animals are hypersensitive to BPA, but are otherwise wild-type (e.g., they have normal body shape); BPA hypersensitivity has also been observed for dpy-2(e8), dpy-7(e88) and dpy-10(e128) mutants.
8478	wrt-2	F52E4.6	23.3556462248769	3.2325	0.138403363746662	0	wrt-2 encodes a hedgehog-like protein, with an N-terminal signal sequence, a Wart domain, and a C-terminal region of low-complexity sequence; WRT-2 is expressed in seam cells and hypodermal syncytia; the Wart domain is predicted to form a cysteine-crosslinked protein involved in intercellular signalling, and it has subtle similarity to the N-terminal Hedge domain of HEDGEHOG proteins; WRT-2 is we…
9598	dsl-6	H02I12.4	23.082320362368	5.525	0.239360684422681	0	dsl-6 encodes a putative transmembrane protein whose extracellular domain has a single DSL and EGF domains in series, somewhat like Delta/LAG-2; DSL-6 belongs to a nematode-specific family of Delta/LAG-2-like proteins that includes DSL-1, -2, -3, -5, -6, and -7.
13272	dpy-2	T14B4.6	22.7328385491814	4.7425	0.2086189100292	0	The dpy-2 gene encodes an unusual cuticular collagen that is required for maintaining the normal body length of the animal in later larval stages; dpy-2 interacts with other cuticular collagens such as dpy-10 and sqt-1, and suppresses mutations in glp-1, mup-1, and emb-5.
8605	cut-2	F53F1.5	22.1125927199144	5.445	0.246239781511296	0	cut-2 encodes a secreted protein which is a component of cuticlin, the insoluble residue of nematode cuticles; CUT-2 is expressed during all developmental stages and contributes to the external cortical layer of the cuticle of all larval stages.
8680	F54B11.10	F54B11.10	21.6315571232202	3.8425	0.177633999166676	0	None
8052	F46E10.2	F46E10.2	20.9095437481395	2.775	0.132714517037079	0	None
14601	lpr-6	W04G3.1	20.438409458662	3.72	0.182010249257602	0	lpr-6 encodes one of seven C. elegans proteins related to the lipocalin family of structurally related, low molecular weight, secreted proteins that bind and transport lipophilic molecules and participate in intercellular signaling; lpr-6 has been reported to be expressed in the amphid sensory neurons.
14611	lpr-3	W04G3.8	20.3822218296644	3.4625	0.169878437637287	0	lpr-3 encodes one of seven C. elegans proteins related to the lipocalin family of structurally related, low molecular weight, secreted proteins that bind and transport lipophilic molecules and participate in intercellular signaling; large-scale RNAi experiments indicate that lpr-3 activity is required for normal growth rates, early larval development, and coordinated locomotion.
709	C02E7.7	C02E7.7	20.2704263232425	4.5975	0.226808253890961	0	None
8777	dpy-17	F54D8.1	19.7961905475031	3.9725	0.200669921340045	0	dpy-17 encodes a cuticle collagen; during development, dpy-17 activity is required for normal body morphology, hermaphrodite tail development, and outgrowth of posterior canal cell processes; genetic and immunofluorescence studies suggest that extracellular assembly of DPY-17 and the essential SQT-3 cuticle collagen is interdependent, as loss of dpy-17 activity results in intracellular retention …
12375	T03G6.1	T03G6.1	19.7402870101855	4.62	0.234039150373862	0	None
639	aqp-2	C01G6.1	19.6441581012129	2.68	0.136427327971593	0	aqp-2 encodes, by alternative splicing, two isoforms of an biochemically atypical aquaglyceroporin; when expressed in Xenopus oocytes, AQP-2 increases water permeability 5- to 11-fold, and urea permeability 4.5-fold, but has no effect on glycerol permeability; AQP-2::GFP fusion proteins are expressed predominantly in the excretory cell and more weakly in muscle, motor neurons, and hypodermis; AQP…
12601	T05H10.3	T05H10.3	19.2538874601721	3.595	0.186715540299926	0	T05H10.3 is expressed in the hypodermis.
4391	D2085.7	D2085.7	19.1818619244188	1.565	0.0815874916713757	0	non-coding Transcript Isoform
14302	ssq-4	T28H11.1	18.3929363525929	2.085	0.113358735116053	0	None
11990	ceh-13	R13A5.5	18.2644652146696	1.9375	0.10608030277524	0	a homolog of Hox genes of labial/Hox1 type; affects viability, body shape and anterior patterning during embryogenesis, interacts genetically with hox genes; and is expressed in A, D, E and MS lineages in the early embryo, and in the anterior dorsal hypodermal cells, anterior body wall muscle cells, and in the cells of the prospective ventral nerve cord at the comma stage; and in the ventral nerv…
5493	F15B9.8	F15B9.8	18.1542480861167	4.5225	0.249115247216355	0	None
8409	noah-2	F52B11.3	17.9096714470118	3.495	0.195145958447112	0	noah-2 encodes a PAN and ZP domain-containing protein that is related to the Drosophila extracellular matrix component NompA (no-mechanoreceptor-potential A); loss of noah-2 function via RNAi indicates that NOAH-2 activity is essential for molting; in addition, NOAH-2 appears to be required for embryonic and larval development, reproduction, coordinated locomotion, and the overall health of the a…
12488	T05A7.11	T05A7.11	17.7965554333047	3.45	0.193857739096164	0	T05A7.11 is an ortholog of members of the human FUT (Fucosyltransferases) family including FUT9; T05A7.11 is predicted to have fucosyltransferase activity, based on protein domain information.
10210	ifa-4	K05B2.3	17.6555827396503	2.895	0.163970798511142	0	IFA-4 encodes a nonessential intermediate filament protein that is coexpressed with the essential IF protein IFB-1; IFA-4 binds IFB-1 in blot overlay assays; ifa-4 is expressed in larvae in the pharyngeal-intestinal valve, the rectum, some neurons of the tail, the excretory cell, and the intestine of dauer (but not nondauer) larvae; IFA-4 has no function in RNAi assays.
17159	Y57A10A.26	Y57A10A.26	17.5781802951409	1.5175	0.0863286173267593	0	Y57A10A.26 is an ortholog of human FAXC (failed axon connections).
11045	M03D4.4	M03D4.4	17.4750981743844	3.5525	0.203289272801189	0	M03D4.4 is predicted to have nucleic acid binding activity, based on protein domain information; M03D4.4 is expressed in the pharyngeal muscle cell.
780	C03C10.5	C03C10.5	17.3569366202428	3.825	0.2203729888337	0	Uncharacterized protein C03C10.5
7512	cutl-28	F41A4.1	16.8636959682427	3.9875	0.236454689856195	0	cutl-28 is involved in determination of adult lifespan.
1911	C17E7.13	C17E7.13	16.6944437561593	2.6225	0.157088192832567	0	None
9381	lips-9	F58G1.5	16.5035853137444	3.41	0.206621769462427	0	lips-9 is involved in meiotic chromosome segregation; lips-9 is predicted to have hydrolase activity, based on protein domain information.
6300	clec-196	F26D10.12	16.4441252217131	2.835	0.172401995349477	0	clec-196 is an ortholog of human CLEC2L (C-type lectin domain family 2, member L) and members of the KLR (Killer cell lectin-like receptors) family including KLRF2.
8902	F55C5.10	F55C5.10	16.2475416643649	3.73025	0.229588578817521	0	None
11223	M7.12	M7.12	16.2135020184008	2.46	0.151725395118718	0	None
18755	her-1	ZK287.8	16.1984771540135	2.6825	0.165601986809936	0	her-1 generates two transcripts, the larger of which encodes a small, secreted, cysteine-rich protein (HER-1A) required for normal sex determination in wild-type XO male animals, while being dispensable for sex determination in XX hermaphrodites; transcription of her-1 in XX animals is repressed by SDC-2; HER-1A protein has two all-helical domains, with fourteen conserved cysteine residues formin…
17406	Y62H9A.3	Y62H9A.3	16.178380846225	1.4875	0.0919436879461943	0	None
7749	F43D9.1	F43D9.1	16.1358040519567	2.315	0.143469764044344	0	F43D9.1 is an ortholog of human PTCHD1 (patched domain containing 1) and PTCHD3 (patched domain containing 3); F43D9.1 is involved in body morphogenesis, embryo development and nematode larval development; F43D9.1 is predicted to have hedgehog receptor activity, based on protein domain information; F43D9.1 is expressed in the muscle cell, all interneurons, and the head neurons; F43D9.1 is localiz…
5826	F20C5.6	F20C5.6	16.1320844678179	1.4775	0.0915876682239967	0	None
3444	let-4	C44H4.2	15.9162075228957	2.84	0.178434466622442	0	let-4 encodes an extracellular leucine-rich repeat only protein; let-4 was originally identified in a screen for essential genes, and let-4 mutants exhibit early larval lethality; let-4 is required for organization of the apical extracellular matrix, and is involved in excretory cell canal morphology and renal function as mutants exhibit excretory canal cysts and impaired renal function.
14046	T26A8.2	T26A8.2	15.79559748766	3.06	0.193724865576663	0	T26A8.2 is an ortholog of human TMEM231 (transmembrane protein 231); T26A8.2 is expressed in the ciliated neurons.
9408	F58H1.2	F58H1.2	15.7587105385782	3.4475	0.218767899287212	0	F58H1.2 is expressed in the hypodermis.
5308	F13E9.11	F13E9.11	15.7080434330697	3.19	0.203080670969128	0	None
15090	Y110A2AL.4	Y110A2AL.4	15.6715266378421	2.9825	0.190313303159512	0	None
6443	acdh-9	F28A10.6	15.5618243038375	1.96	0.125949243593289	0	acdh-9 is an ortholog of human ACAD8 (acyl-CoA dehydrogenase 8); acdh-9 is predicted to have acyl-CoA dehydrogenase activity and flavin adenine dinucleotide binding activity, based on protein domain information.
5992	cut-3	F22B5.3	15.4701580705084	4.0675	0.262925561682145	0	cut-3 is involved in body morphogenesis.
16667	Y50D4B.4	Y50D4B.4	15.3770236041699	1.5225	0.099011358712302	0	Y50D4B.4 is an ortholog of human NGLY1 (N-glycanase 1).
9853	H42K12.3	H42K12.3	15.3564561953579	2.6325	0.171426269610027	0	None
14795	mlt-8	W08F4.6	15.2536709789093	2.8725	0.188315324486263	0	mlt-8 encodes a novel protein; during development, mlt-8 activity is required for molting; a mlt-8::gfp reporter is expressed in hypodermal cells and in a single posterior neuron.
1895	C17D12.3	C17D12.3	15.2102462956995	2.4725	0.162554895688906	0	C17D12.3 is an ortholog of human NGLY1 (N-glycanase 1).
4593	F01D5.6	F01D5.6	15.0324590045261	3.565	0.237153482269709	0	None
10763	K10G6.4	K10G6.4	14.79638084681	2.9325	0.198190356842041	0	K10G6.4 is expressed in certain interneurons, certain amphid neurons, certain sensory neurons, ventral nerve cord, and certain head motor neurons.
5029	F10C1.9	F10C1.9	14.6782032797924	1.345	0.0916324685223343	0	F10C1.9 is an ortholog of human LMNTD2 (lamin tail domain containing 2).
15597	Y37A1B.7	Y37A1B.7	14.5820941812452	4.87	0.333971234821921	0	None
9623	glf-1	H04M03.4	14.5399618895498	5.365	0.368983085427201	0	glf-1 encodes a UDP-galactopyranose mutase predicted to synthesize galactofuranose (Gal(f)) as a nucleotide sugar (UDP-Gal(f)); recombinant GLF-1 has biochemical activity either in vivo (expressed in E. coli) or in vitro; orthologs of GLF-1 are found in the urochordates Halocynthia and Ciona.
3456	C44H9.7	C44H9.7	14.4760161632925	3.6825	0.254386286838909	0	None
12415	T04C12.1	T04C12.1	14.4660516208111	3.8575	0.266658802354233	0	None
11097	gcy-34	M04G12.3	14.4624257648532	1.63	0.11270585076822	0	gcy-34 encodes a soluble guanylyl cyclase; GCY-34 activity is required for response to molecular oxygen changes under different conditions; gcy-34 is expressed in sensory neurons connected to the pseudocoelom, URXL, URXR, AQR, and PQR; gcy-34 expression is regulated by ahr-1 and aha-1.
16059	Y41D4B.6	Y41D4B.6	14.4041814327517	2.95	0.204801641368693	0	Y41D4B.6 is involved in reproduction.
9339	end-1	F58E10.2	14.376036117609	1.6425	0.114252634492767	0	end-1 encodes a GATA-type transcription factor paralogous to end-3; during early embryonic development, end-1 functions redundnatly with end-3 to specify endodermal fate; when expressed ectopically, however, END-1 is sufficient to initiate endoderm differentiation; END-1 expression bypasses requirement for maternal SKN-1 and the maternal Wnt signaling pathway in endoderm formation and END-1 activ…
16666	Y50D4B.3	Y50D4B.3	14.3496799454405	2.4875	0.173348814012426	0	None
843	C04C11.1	C04C11.1	14.336694518695	2.2575	0.157463074703602	0	non-coding Transcript Isoform
8046	dpy-7	F46C8.6	14.3208489517245	3.06	0.213674483287635	0	dpy-7 encodes a cuticular collagen; DPY-7 functions as a structural constituent of the extracellular cuticle whose activity is required for normal cuticular morphology and hence, proper body form.
1704	C14F11.6	C14F11.6	14.2842924056618	4.2125	0.294904352303114	0	C14F11.6 is predicted to have dTDP-4-dehydrorhamnose 3,5-epimerase activity, based on protein domain information.
11610	R07E4.1	R07E4.1	14.2143214289675	1.61	0.113266047067078	0	R07E4.1 is an ortholog of human ANKFN1 (ankyrin-repeat and fibronectin type III domain containing 1).
6837	F33A8.7	F33A8.7	14.0347774476859	3.99775	0.28484598454813	0	None
10542	atf-2	K08F8.2	13.9988754447	2.5	0.178585773541296	0	atf-2 encodes a cAMP-dependent transcription factor paralogous to CES-2, a bZip-like transcription factor that plays a key role in regulation of apoptosis; atf-2 activity is required for excretory duct cell development and essential for embryonic development; in regulating excretory duct cell development, ATF-2 controls expression of lin-48; in vitro, ATF-2 binds the regulatory regions of LIN-48 …
12899	T08G5.3	T08G5.3	13.8945131520821	2.925	0.210514752692986	0	None
4255	dex-1	D1044.2	13.8510669756914	2.21	0.159554495251416	0	dex-1 encodes a single-pass transmembrane protein with a domain similar to zonaadhesion, a sperm protein that binds the ZP matrix, dex-1 is also predicted to include two domains similar to nidogens, a family of proteins found in especially neural basement membrane; dex-1 share a domain composition with alpha and beta; tectorin, two vertebrate inner ear protein found in matrix that anchors the sen…
13241	nhr-127	T13F3.3	13.6013441840921	4.4025	0.323681243589813	0	nhr-127 encodes a member of the nuclear hormone receptor family; expressed in hypodermal seam cells from the embryonic 1.5-fold stage until the L1 larval stage.
2527	C29F7.2	C29F7.2	13.5482174204611	3.23	0.238407747658516	0	C29F7.2 is expressed in the pharynx and the intestine.
5436	col-165	F14H12.1	13.5158336648089	3.14	0.232320112682031	0	col-165 is an ortholog of human COL20A1 (collagen, type XX, alpha 1), EMID1 (EMI domain containing 1) and members of the COL (Collagens) family including COL25A1; col-165 is a structural constituent of cuticle, based on protein domain information.
291	hlh-1	B0304.1	13.5115183498372	2.1225	0.157088192832567	0	hlh-1 encodes a basic helix-loop-helix (bHLH) transcription factor that is the C. elegans ortholog of the myogenic regulatory factor (MRF) subgroup of bHLH proteins; in C. elegans, HLH-1 activity is required during embryogenesis for proper bodywall muscle development and function, but not for bodywall muscle cell fate specification, per se: hlh-1 null mutants generate the normal number of bodywal…
5531	F15G9.1	F15G9.1	13.5012314975476	1.5875	0.117581866534794	0	F15G9.1 is expressed in the muscle cell and the hypodermis; F15G9.1 is localized to the striated muscle dense body and the striated muscle thin filament.
15504	sri-40	Y27F2A.3	13.4640504895477	1.9725	0.146501233156492	0	sri-40 is involved in reproduction.
14381	mlt-11	W01F3.3	13.3122928138739	3.0575	0.229674935997014	0	mlt-11 encodes one of 13 C. elegans proteins related to the mammalian Tissue Factor Pathway Inhibitors (TFPIs), serine protease inhibitors that function in blood coagulation (OMIM:152310); in C. elegans, genetic analysis indicates that mlt-11 is required for proper molting and, likely, for proper spatial and/or temporal regulation of proteolysis during the molting cycle; a mlt-11::gfp promoter fu…
11259	MTCE.7	MTCE.7	13.296181905553	1.2225	0.0919436879461943	0	MTCE.7 encodes a mitochondrial 18s ribosomal RNA (rRNA).
4926	F09C8.1	F09C8.1	13.2163789071782	3.2475	0.245717834121432	0	F09C8.1 is an ortholog of human PLB1 (phospholipase B1); F09C8.1 is predicted to have hydrolase activity, acting on ester bonds, based on protein domain information; F09C8.1 is expressed in the intestine.
9802	dpy-14	H27M09.4	13.154606343261	4.315	0.328021978568028	0	dpy-14 encodes a type III (alpha 1) collagen that is required for embryonic, larval, and vulval development, proper amphid morphology, and regulation of body shape and size; a dpy-14 promoter-GFP fusion construct is reportedly expressed in embryonic neurons.
7505	F40H7.12	F40H7.12	13.128275695991	2.63	0.200330954414914	0	None
7589	agr-1	F41G3.12	13.064122314997	2.3275	0.178159691396042	0	agr-1 encodes a large (1396-residue) putative agrin, orthologous to human AGRIN (OMIM:103320), EGFLAM, and Q9NQ15; AGR-1 is expressed in buccal epithelium and deposited in pharyngeal basal epithelium; AGR-1 is also expressed in IL1 neurons, distal tip cells, and intestine; an AGR-1 fragment can cluster vertebrate dystroglycan in cell culture; agr-1(eg1770) mutations show no obvious phenotype, inc…
463	nhx-2	B0495.4	13.0605590001788	1.1275	0.0863286173267593	0	nhx-2 encodes a sodium/proton exchanger; NHX-2 promotes normal peptide transporter function and recovery from intracellular acid load via catalysis of the electroneutral exchange of extracellular sodium for an intracellular proton; NHX-2 activity is required for normally high growth rates, and for propagation or maintenance of the germline; NHX-2 is expressed in the apical membranes of intestinal…
19148	lon-3	ZK836.1	13.0286159325668	3.3975	0.260772135550291	0	lon-3 encodes a cuticle collagen; during development, lon-3 acts downstream of the TGF-beta signaling pathway to specify body length; lon-3 reporter fusions are expressed in hypodermal cells and LON-3 appears to localize to the surface of the animal, consistent with a role in cuticle formation.
2939	noah-1	C34G6.6	13.0147347351465	2.835	0.217830025558956	0	noah-1 encodes a PAN and ZP domain-containing protein that is related to the Drosophila extracellular matrix component NompA (no-mechanoreceptor-potential A); loss of noah-1 function via RNAi indicates that NOAH-1 activity is essential for molting; in addition, NOAH-1 appears to be required for embryonic and larval development, vulval development, coordinated locomotion, and normal body morpholog…
15463	Y23H5B.8	Y23H5B.8	12.9674473662128	3.615	0.278774989241061	0	None
18748	ZK287.1	ZK287.1	12.8808285306307	2.98	0.231351577494688	0	ZK287.1 is involved in reproduction; ZK287.1 is predicted to have hydrolase activity, acting on carbon-nitrogen (but not peptide) bonds, in cyclic amidines and zinc ion binding activity, based on protein domain information; ZK287.1 is expressed in the nervous system, tail, and the intestine.
9079	F56D2.3	F56D2.3	12.8555912535015	1.9625	0.15265731161649	0	None
10497	mlc-7	K08E3.10	12.8398721946002	1.16	0.0903435783798409	0	mlc-7 is an ortholog of members of the human MYL (Myosin light chains) family including MYL6B; mlc-7 is involved in reproduction; mlc-7 is predicted to have calcium ion binding activity, based on protein domain information.
5956	tbx-2	F21H11.3	12.7915740509982	1.3125	0.10260660609611	0	tbx-2 encodes one of 21 C. elegans T-box transcription factors; during development, tbx-2 activity is required for normal adaptation, but not chemotaxis, to attractive odorants sensed by the AWC amphid neurons; tbx-2 is required redundantly with unc-3 and unc-31 for negative regulation of dauer formation, and large-scale RNAi screens reveal an essential role for tbx-2 in early larval development,…
12029	R13H4.8	R13H4.8	12.6665265610381	4.8825	0.385464789930526	0	None
9939	K02A2.1	K02A2.1	12.6226415499031	2.165	0.171517189285678	0	K02A2.1 is predicted to have hydrolase activity, based on protein domain information.
6412	spp-18	F27C8.4	12.5839075347193	2.67	0.212175748481417	0	spp-18 is involved in innate immune response.
16312	acl-7	Y46G5A.21	12.5817621129672	1.5725	0.124982493380583	0	Y46G5A.21 is orthologous to the human gene GLYCERONEPHOSPHATE O-ACYLTRANSFERASE (GNPAT; OMIM:602744), which when mutated leads to disease.
289	sdz-1	B0303.8	12.491389392137	2.2255	0.178162727150344	0	sdz-1 is involved in reproduction; sdz-1 is expressed in the MS, E, MSp, MSa, MSpa, MSpp, Ep, MSaa, Ea, and the MSap.
9966	K02B7.3	K02B7.3	12.4531394316746	1.32	0.105997367751507	0	None
1460	mnm-2	C10A4.8	12.3142483619543	1.68	0.136427327971593	0	mnm-2 is an ortholog of members of the human Zinc fingers, C2H2-type family including ZNF557; mnm-2 is involved in axon guidance; mnm-2 is predicted to have metal ion binding activity and nucleic acid binding activity, based on protein domain information; mnm-2 is expressed in certain pharyngeal motor neurons, all ventral cord neurons, certain sensory neurons, intestine, rectum, body wall muscula…
18469	ZC84.1	ZC84.1	12.3037290199493	2.2225	0.180636292980481	0	ZC84.1 is an ortholog of human WFDC8 (WAP four-disulfide core domain 8), SPINT2 (serine peptidase inhibitor, Kunitz type, 2) and TFPI (tissue factor pathway inhibitor (lipoprotein-associated coagulation inhibitor)); ZC84.1 is predicted to have serine-type endopeptidase inhibitor activity, based on protein domain information.
4010	C54C8.4	C54C8.4	12.2606025049888	1.7975	0.146607803268119	0	None
266	mnp-1	B0285.7	12.1840401253138	2.875	0.235964423165912	0	mnp-1 encodes a protein related to the M1 family of metalloproteinases, but whose sequence indicates that it is unlikely to be catalytically active (MNP-1 lacks three of the four essential zinc-binding amino acids); during embryonic development mnp-1 activity is required, likely cell autonomously, for migration of muscle cells from their lateral positions to their final positions close to the dor…
2953	C35A5.11	C35A5.11	12.1827951173839	5.605	0.460075044026809	0	None
14605	lpr-5	W04G3.2	12.1413042969604	4.56	0.375577441143751	0	lpr-5 encodes one of seven C. elegans proteins related to the lipocalin family of structurally related, low molecular weight, secreted proteins that bind and transport lipophilic molecules and participate in intercellular signaling; loss of lpr-5 function via RNAi results in defects in locomotion, body morphology, larval lethality, and yolk endocytosis; lpr-5 appears to be expressed in the hypode…
18016	Y7A9D.1	Y7A9D.1	12.1410616845294	2.04	0.16802484436756	0	None
14507	W03D2.9	W03D2.9	12.1030391260729	2.7175	0.224530382137314	0	None
12562	T05E7.1	T05E7.1	12.0877994144803	1.8125	0.149944579476456	0	T05E7.1 is an ortholog of human BAAT (bile acid CoA:amino acid N-acyltransferase) and members of the ACOT (Acyl-CoA thioesterases) family including ACOT2; T05E7.1 is predicted to have thiolester hydrolase activity, based on protein domain information.
9918	K01D12.9	K01D12.9	12.0408232462576	5.9025	0.490207345401781	0	None
6473	F28B4.4	F28B4.4	12.0366300034003	1.625	0.13500456519316	0	None
14491	W03B1.3	W03B1.3	12.0309606467168	3.0825	0.256213954190034	0	None
11366	R03G8.6	R03G8.6	11.9875542046313	2.355	0.196453751932997	0	R03G8.6 is an ortholog of human ANPEP (alanyl (membrane) aminopeptidase) and ERAP1 (endoplasmic reticulum aminopeptidase 1) and members of the Aminopeptidases family including LNPEP; R03G8.6 is predicted to have metallopeptidase activity and zinc ion binding activity, based on protein domain information.
4017	alh-10	C54D1.4	11.984139411504	1.395	0.116403852800718	0	alh-10 is an ortholog of human ALDH8A1 (aldehyde dehydrogenase 8A1); alh-10 is involved in multicellular organismal homeostasis; alh-10 is predicted to have oxidoreductase activity, acting on the aldehyde or oxo group of donors, based on protein domain information; alh-10 is expressed in the nervous system and the intestine.
9592	ttr-42	H01M10.3	11.9526669012312	2.225	0.18615092500995	0	None
11643	sdz-27	R07H5.4	11.9343849408285	1.51	0.12652516300477	0	sdz-27 is involved in engulfment of apoptotic cell.
8184	F47E1.4	F47E1.4	11.9142220345603	3.1675	0.265858735116053	0	F47E1.4 is an ortholog of human SLCO3A1 (solute carrier organic anion transporter 3A1); F47E1.4 is involved in embryo development; F47E1.4 is predicted to have transporter activity, based on protein domain information.
5842	exc-9	F20D12.5	11.8871230076914	1.4175	0.119246683918626	0	exc-9 encodes one of two C. elegans small LIM domain-containing proteins related to the mammalian CRIP (Cysteine-Rich Intestinal Protein) family of proteins; in C. elegans, exc-9 activity is required cell autonomously for proper organization of the apical cytoskeleton of the excretory canal cell, which is essential for maintaining the diameter of the excretory canal tubules; in addition, exc-9 is…
1305	C08F11.12	C08F11.12	11.8620189052568	2.2575	0.190313303159512	0	UPF0375 protein C08F11.12
12337	cpl-1	T03E6.7	11.8085824518349	0.9625	0.0815085133144357	0	cpl-1 encodes a member of the cathepsin L-like cysteine protease family required for embryonic viability and normal growth; expressed in eggshells and throughout early embryos, accumulates in intestinal cells during late embryogenesis, and expressed in the cuticle, gonad, and pharynx later in development.
11031	M03B6.3	M03B6.3	11.7755068359022	5.325	0.452209834719358	0	None
11681	R08E5.3	R08E5.3	11.7282225301742	2.725	0.23234552320176	0	R08E5.3 is an ortholog of human WBSCR27 (Williams Beuren syndrome chromosome region 27); R08E5.3 is expressed in the intestine.
8073	F46F3.3	F46F3.3	11.6939584208608	2.6325	0.225116244239752	0	None
10455	fmo-1	K08C7.2	11.6563685069208	2.1975	0.188523552485087	0	fmo-1 encodes a flavin-containing monoxygenase homologous to human FMO1, FMO2, and FMO3 (OMIM:602079, mutated in trimethylaminuria).
18394	ZC449.2	ZC449.2	11.6220617195129	3.4525	0.297064331899341	0	None
5280	F13C5.2	F13C5.2	11.59555961625	1.49	0.128497463624948	0	F13C5.2 encodes a bromodomain-containing protein; loss of F13C5.2 activity via RNAi in wild-type or various mutant backgrounds results in embryonic and larval lethality as well as sterility, reduced brood sizes, and uncoordinated locomotion; an F13C5.2::gfp reporter fusion is expressed ubiquitously from early embryogenesis through adulthood with notably stronger expression seen in neurons.
18393	ZC449.1	ZC449.1	11.5493526908345	4.31	0.373181087752251	0	None
112	B0205.13	B0205.13	11.5280485999143	2.05	0.177827147607206	0	B0205.13 encodes a small, novel protein conserved in C. remanei and C. briggsae.
5359	F14B4.1	F14B4.1	11.5139186944438	2.0875	0.181302305096818	0	F14B4.1 is an ortholog of human NID2 (nidogen 2 (osteonidogen)), LRP5L (low density lipoprotein receptor-related protein 5-like) and NID1 (nidogen 1) and members of the LRP (Low density lipoprotein receptors) family including LRP6; F14B4.1 is predicted to have calcium ion binding activity, based on protein domain information.
14355	cwn-2	W01B6.1	11.4738364936413	1.72	0.149906267267553	0	cwn-2 encodes one of five C. elegans Wnt signaling molecules that is homologous to mammalian Wnt5; cwn-2 is required for proper placement of the nerve ring and anterior cells along the anterior/posterior axis; cwn-2 also acts redundantly to specify cell fates during vulval development; CWN-2 appears to be required at the time of nerve ring development (comma stage of embryogenesis) for nerve ring…
3970	odr-10	C53B7.5	11.4632744977223	1.37	0.119512099293462	0	odr-10 encodes a seven transmembrane G protein-coupled olfactory receptor; ODR-10 activity is required, in the AWA neurons, for the attractive response to low concentrations of diacetyl; ODR-10 is strongly expressed in the cilia of the AWA olfactory neurons and, at low levels, in the CEP neurons; expression of odr-10 mRNA and of an odr-10::GFP fusion gene is greatly reduced in odr-7 mutant animal…
16231	Y45F10C.2	Y45F10C.2	11.4328815151075	2.2075	0.193083431948717	0	Y45F10C.2 is expressed in the uterine epithelial cell.
14990	hlh-32	Y105C5B.29	11.4227773189033	2.74	0.239871611211892	0	hlh-32 encodes a basic helix-loop-helix (bHLH) transcription factor similar to the vertebrate Olig2 proteins that play a role in motoneuron and oligodendrocyte development; genetic analyses suggest that, along with hlh-17, hlh-31 and vab-3, hlh-32 may play a redundant role in regulation of ventral cephalic sheath (CEPsh) glia function, as assayed by AWC axonal defects; an hlh-32::gfp promoter fus…
13704	chhy-1	T22C8.2	11.3987745020619	1.6675	0.146287655721093	0	chhy-1 encodes a chondroitin hydrolase orthologous to human HYAL1 (OMIM:607071, mutated in mucopolysaccharidosis type IX) and other hyaluronidases; in COS-7 cells, heterologously expressed CHHY-1 preferentially cleaves chondroitin as an endo-ss-galactosaminidase, with lesser activity on chondroitin sulfate A (CS-A) and CS-C, but almost no activity on hyaluronic acid; the optimum pH for CHHY-1 cle…
8508	let-268	F52H3.1	11.352782487799	1.5325	0.134988933474855	0	let-268 encodes a procollagen lysyl hydroxylase that processes type IV collagen, a collagen secreted and incorporated into the basement membrane during embryogenesis (and encoded partly by emb-9); LET-268 activity is essential for type IV collagen processing and secretion and for the stability, but not the formation of, the basement membrane that provides mechanical support to body wall muscle on…
6669	F31D4.5	F31D4.5	11.3361697307815	2.9075	0.256479928322276	0	F31D4.5 is an ortholog of human PLEKHD1 (pleckstrin y domain containing, family D (with coiled-coil domains) member 1).
15728	cyp-29A3	Y38C9B.1	11.3162933253101	2.005	0.177178157402089	0	cyp-29A3 is an ortholog of human CYP19A1 (cytochrome P450 19A1) and members of the CYP4 (Cytochrome P4504) family including CYP4B1; cyp-29A3 is predicted to have heme binding activity, iron ion binding activity, and oxidoreductase activity, acting on paired donors, with incorporation or reduction of molecular oxygen, based on protein domain information.
8103	F46G11.6	F46G11.6	11.29985529542	2.6975	0.238719871137936	0	None
4657	F02D8.4	F02D8.4	11.2628980123293	0.9825	0.0872333212042296	0	F02D8.4 is an ortholog of human CPB2 (carboxypeptidase B2 (plasma)), CPO (carboxypeptidase O), CPA3 (carboxypeptidase A3 (mast cell)), CPA1 (carboxypeptidase A1 (pancreatic)), CPA4 (carboxypeptidase A4), CPB1 (carboxypeptidase B1 (tissue)), CPA2 (carboxypeptidase A2 (pancreatic)), CPA5 (carboxypeptidase A5) and CPA6 (carboxypeptidase A6); F02D8.4 is predicted to have metallocarboxypeptidase activ…
5191	F11E6.9	F11E6.9	11.2316887923183	2.58	0.229707219253132	0	None
17407	Y62H9A.4	Y62H9A.4	11.2097952771814	1.62	0.144516466174692	0	None
8124	acbp-3	F47B10.7	11.1788749825648	2.96	0.264785142030534	0	acbp-3 encodes a highly conserved protein containing a functional acyl-CoA-binding binding domain required for protein stability and ligand binding; mutant contains approximately 30% fewer lipid droplets and 20% less triglycerides; loss of ACBP-3 results in 35-40% reduction in lipid chain unsaturation; ACBP-3::GFP is predominantly expressed in hypodermis, body wall muscles and pharynx.
2491	C29A12.6	C29A12.6	11.046329622058	3.1775	0.287652107868932	0	None
18202	mab-7	ZC13.4	11.0409269380504	3.05	0.276244921926689	0	mab-7 encodes a protein with a hydrophobic type II transmembrane region at the N-terminus, an EGF-like motif, a ShKT motif and a long C-terminus; mab-7 is involved in morphogenesis of the male tail, specifically affecting the structural cells, neuronal processes and the hypodermal sheath of the sensory rays, as such, it affects mating in males; a mab-7 promoter-gfp construct is expressed in hypod…
2264	C25F6.7	C25F6.7	11.0324224397685	3.3	0.299118350300339	0	C25F6.7 is an ortholog of human ITM2C (integral membrane protein 2C), ITM2A (integral membrane protein 2A) and ITM2B (integral membrane protein 2B).
12284	grl-7	T02E9.2	11.0099413982733	3.495	0.317440381703405	0	grl-7 encodes a hedgehog-like protein, with an N-terminal signal sequence, a central low-complexity region, and a C-terminal Ground-like (Grl) domain; GRL-7 is expressed in intestine, hypodermis, and seam cells; the Grl domain is predicted to form a cysteine-crosslinked protein involved in intercellular signalling, and it has subtle similarity to the N-terminal Hedge domain of HEDGEHOG proteins.
3796	C50D2.1	C50D2.1	11.0087180213889	2.9425	0.267288161462852	0	C50D2.1 is involved in embryo development and lipid storage.
4232	D1022.3	D1022.3	10.994889126242	1.7775	0.16166602314866	0	D1022.3 is predicted to have hydrolase activity, based on protein domain information.
6252	F25H5.8	F25H5.8	10.985015855356	1.5	0.136549643600982	0	None
4405	D2092.8	D2092.8	10.9797676322098	3.374	0.307292477675226	0	None
13831	T23F11.6	T23F11.6	10.9760231023205	2.9725	0.270817578670325	0	T23F11.6 is an ortholog of human FAM46C (family with sequence similarity 46, member C), FAM46D (family with sequence similarity 46, member D), FAM46B (family with sequence similarity 46, member B) and FAM46A (family with sequence similarity 46, member A).
17021	Y54G2A.3	Y54G2A.3	10.9297400558258	1.4375	0.131521883654843	0	None
174	B0228.6	B0228.6	10.8644801570703	1.285	0.118275332222293	0	Uncharacterized protein B0228.6
19132	ZK822.1	ZK822.1	10.83973215492	2.255	0.208030970486342	0	None
18287	nstp-3	ZC250.3	10.818002784964	4.34811111111111	0.401932888865085	0	nstp-3 is an ortholog of human SLC35A1 (solute carrier family 35 (CMP-sialic acid transporter), member A1); nstp-3 is involved in body morphogenesis, determination of adult lifespan, embryo development, locomotion and nematode larval development; nstp-3 is predicted to have nucleotide-sugar transmembrane transporter activity and sugar:proton symporter activity, based on protein domain information.
19044	bus-17	ZK678.8	10.804070301993	1.9025	0.176091042248129	0	bus-17 encodes a putative GT13 glycosyltransferase whose homologs include human B3GALT2 and C. elegans BRE-5; BUS-17 is required for bacterial infection, as well as for cuticle integrity, long-term survival, and traction during movement; specifically, bus-17 is needed both for colonization by Microbacterium nematophilum (and the tail-swelling response to M. nematophilum infection) and for attachm…
4677	ncam-1	F02G3.1	10.6772091230896	2.21	0.206982927328908	0	ncam-1 is an ortholog of human NCAM2 (neural cell adhesion molecule 2) and NCAM1 (neural cell adhesion molecule 1); ncam-1 is expressed in the pharynx, GLRVR, GLRVL, GLRR, GLRL, GLRDR, GLRDL, certain interneurons, certain ventral cord neurons, certain amphid neurons, and the intestine.
7276	pha-4	F38A6.1	10.6644793906138	1.3	0.121899996463416	0	pha-4 encodes a FoxA transcription factor; during embryonic development, PHA-4 functions as an organ identity gene whose activity is necessary and sufficient for development of the pharynx/foregut; in addition, PHA-4 plays a key role in regulation of diet-restriction-induced longevity in adult animals; PHA-4 expression begins early in embryogenesis and is seen in pharyngeal and intestinal cells (…
9885	K01A2.9	K01A2.9	10.6284956756536	2.3175	0.21804590891528	0	None
7580	F41F3.3	F41F3.3	10.6034617919951	4.215	0.397511688416895	0	None
9586	H01G02.1	H01G02.1	10.5915314410216	1.75	0.165226342360855	0	None
9884	mps-2	K01A2.8	10.5869715021511	1.445	0.136488513235952	0	mps-2 encodes single-pass transmembrane proteins that are related to the vertebrate KCNE proteins, also known as MinK-related peptides (MiRPs) that associate with, and regulate, pore-forming ion channels; mps-1 is required for the normal function of several neurons and thus for normal body touch sensation, chemotaxis to select molecules, osmotic avoidance, and nose-touch; when coexpressed in tiss…
19221	vab-23	ZK930.3	10.5829468367657	1.065	0.100633596334448	0	vab-23 encodes a novel 253 amino acid coiled-coil containing a C-terminal C4H2 zinc finger domain; VAB-23 is a conserved protein and has a strong homology to human hepatocellular carcinoma antigen (HCA127) (OMIM: 610334); vab-23 is required in ventral neuroblasts for ventral closure and elongation of the embryo, specifically to regulate proper cell contacts between contralateral pairs of ventral …
5492	fmi-1	F15B9.7	10.5808433942217	1.4375	0.135858735116053	0	fmi-1 encodes a highly conserved cadherin-like protein with unique domain composition of six EGF and two laminin G domains, a GPS cleavage site and seven-pass transmembrane domain; fmi-1 plays a crucial role in pioneer axon navigation as well as pioneer-mediated follower navigation; FMI-1 is required cell autonomously in pioneer and partially non-cell autonomously in the follower; different domai…
2675	linc-95	C32A3.8	10.5629264601272	1.2275	0.116208325849238	0	C. elegans lincRNA gene
5665	F17E9.4	F17E9.4	10.5579474734044	1.52	0.143967376597478	0	None
18334	ZC376.2	ZC376.2	10.5045403041688	1.49	0.141843427399548	0	ZC376.2 is an ortholog of human CEL (carboxyl ester lipase) and members of the CES (Carboxylesterases) family including CES4A.
9771	ugt-8	H23N18.3	10.4829606000402	1.01	0.0963468278222972	0	ugt-8 is an ortholog of human UGT3A2 (UDP glycosyltransferase 3 family, polypeptide A2) and UGT3A1 (UDP glycosyltransferase 3 family, polypeptide A1); ugt-8 is predicted to have transferase activity, transferring hexosyl groups, based on protein domain information; ugt-8 is expressed in the pharynx, nervous system, intestine, and the excretory cell.
5093	clec-7	F10G2.3	10.4699584676025	1.1375	0.108644175000292	0	clec-7 is an ortholog of human CLEC3B (C-type lectin domain family 3, member B) and CLEC3A (C-type lectin domain family 3, member A); clec-7 is involved in defense response to Gram-positive bacterium.
13289	lin-32	T14F9.5	10.4325666888188	3.11	0.298104971936884	0	lin-32 encodes a basic helix-loop-helix transcription factor that is required for development of several types of neurons, including the touch receptor neurons and the male sensory ray neurons.
7405	nep-14	F40B5.1	10.4277716008993	2.62	0.251252146697772	0	None
14086	T26F2.2	T26F2.2	10.4204020887108	0.9925	0.0952458447908889	0	None
3150	tag-297	C38C6.6	10.3760376480857	4.595	0.442847275216637	0	tag-297 is involved in locomotion, the molting cycle and nematode larval development; tag-297 is expressed in the hypodermis and the head neurons.
18950	spp-7	ZK616.9	10.3328398799153	3.7425	0.362194715440678	0	spp-7 encodes an antimicrobial peptide that belongs to the SPP-protein family, called caenopores, with structural similarity to saposin-like proteins (SAPLIPs), the amoebapores and the mammalian NK-lysin and granulysin; caenopores are part of the worm's innate immune system and interact with and eliminate bacteria via membrane pore-forming activity; C. elegans has at least 33 putative SPP protein…
11907	R11G1.7	R11G1.7	10.2899865141082	1.525	0.148202332229409	0	None
12286	T02E9.5	T02E9.5	10.2360855721512	1.4875	0.145319222813745	0	None
4735	flp-6	F07D3.2	10.1668982358039	1.5875	0.15614398444645	0	flp-6 is predicted to have hormone activity, based on protein domain information; flp-6 is expressed in the R7BR, R7BL, R6BR, R6BL, R5BR, R5BL, R2BR, R2BL, certain interneurons, certain amphid neurons, and the head.
1536	C11H1.7	C11H1.7	10.1638825272584	1.5425	0.151762871704114	0	C11H1.7 is an ortholog of human CNPY3 (canopy FGF signaling regulator 3) and CNPY4 (canopy FGF signaling regulator 4).
10702	cwn-1	K10B4.6	10.139821090895	1.7125	0.168888581430468	0	cwn-1 encodes one of five C. elegans Wnt signaling ligands; during embryogenesis cwn-1 likely functions as a downstream target of the PAL-1 homeodomain protein in the regulatory network that specifies cell fates in the C lineage that gives rise to ectodermal and muscle tissue; consistent with this role, loss of cwn-1 activity via RNAi results in rare larval tail defects that may result, in part, …
17429	Y65A5A.1	Y65A5A.1	10.1207176867921	1.965	0.194156191370144	0	None
5876	ddo-3	F20H11.5	10.1149433167475	1.8575	0.183639190238911	0	ddo-3 encodes a putative secreted D-aspartate oxidase (DASPO), paralogous to DDO-1 and DDO-2; recombinant DDO-3 protein is insoluble when expressed in E. coli, and thus has not yet been tested in vitro for activity; ddo-3 is expressed in a head mesodermal cell, hypodermis, other head cells, and vulva.
5729	pes-8	F18G5.2	10.113252131527	1.615	0.159691460174854	0	pes-8 encodes a novel protein that contains a proline-rich region and a predicted transmembrane domain, but no otherwise recognizably conserved domains; pes-8 was identified in promoter trapping screens and based on large-scale RNA-mediated interference (RNAi) screens, appears to be required for egg laying, germline development, locomotion, and regulation of adult lifespan; a pes-8 reporter is ex…
4831	spp-13	F08F1.6	10.0819064892849	2.955	0.29309932631696	0	None
4228	D1014.5	D1014.5	10.0308231249968	3.43	0.341946015522142	0	D1014.5 is expressed in the hypodermis.
1644	C14A4.9	C14A4.9	10.0243493123237	4.71	0.469855933113747	0	C14A4.9 is involved in determination of adult lifespan.
18804	prkl-1	ZK381.5	10.0188853795116	1.915	0.191139026694139	0	prkl-1 encodes a homolog of Drosophila ESPINAS and PRICKLE, and of human PRICKLE1, PRICKLE2, and LMO6; prkl-1 enables Wnt-directed planar cell polarity; prkl-1 is required for the fully asymmetrical division of B.a versus B.p cells, though this requirement is quantitatively weak.
14366	W01C8.5	W01C8.5	9.97922317591291	1.42	0.142295645158782	0	W01C8.5 is an ortholog of human THBD (thrombomodulin).
13273	dpy-10	T14B4.7	9.97660240074809	1.5425	0.154611754386878	0	A cuticle collagen protein that afffects body morphology and movement and genetically interacts with the sqt-1 collagen gene.
14606	lpr-4	W04G3.3	9.94766867342378	3.8925	0.391297712839915	0	lpr-4 encodes one of seven C. elegans proteins related to the lipocalin family of structurally related, low molecular weight, secreted proteins that bind and transport lipophilic molecules and participate in intercellular signaling; loss of lpr-4 via RNAi has been reported to result in defective yolk endocytosis; lpr-4 appears to be expressed in body wall muscle.
3469	ptr-4	C45B2.7	9.93425262622084	3.545	0.356846169851086	0	ptr-4 encodes a nematode-specific member of the sterol sensing domain (SSD) proteins, distantly paralogous to Drosophila PATCHED (PTC) and human PTCH (OMIM:601309, mutated in basal cell nevus syndrome); PTR-4 is strongly required for normal molting from L4 to adult stages male tail development (a role conserved in C. briggsae); PTR-4 is also required for normal endocytosis of yolk by oocytes, adu…
7037	ttr-38	F35G8.2	9.93143487619525	1.4125	0.142225168629524	0	None
8824	F54F7.9	F54F7.9	9.86186179768062	1.93	0.195703411748673	0	None
5822	klp-11	F20C5.2	9.83666491465407	0.91	0.0925110296930352	0	klp-11 encodes a kinesin motor protein that functions as a subunit of C. elegans heterotrimeric kinesin-II; in vitro microtubule gliding assays demonstrate that purified kinesin-II and OSM-3, a homomeric kinesin-II motor, cooperatively generate movement similar to that seen along cilia lacking additional regulatory factors; antibodies to KLP-11 detect high intensity staining in the cilia of chemo…
14370	pqn-73	W01C9.3	9.83657085116697	2.7975	0.284397890517722	0	The protein product of this gene is predicted to contain a glutamine/asparagine (Q/N)-rich ('prion') domain, by the algorithm of Michelitsch and Weissman (as of the WS77 release of WormBase, i.e., in wormpep77).
14799	W08G11.1	W08G11.1	9.82488232817874	3.3525	0.341225460826609	0	None
14907	Y102A11A.6	Y102A11A.6	9.79577855835188	1.34	0.136793619008212	0	Y102A11A.6 is an ortholog of human ERGIC1 (endoplasmic reticulum-golgi intermediate compartment 1); Y102A11A.6 is expressed in the pharynx and the nervous system.
16055	Y41D4B.26	Y41D4B.26	9.79462921468836	3.2125	0.327985871602207	0	None
19037	ZK675.4	ZK675.4	9.78334594006408	4.59869444444444	0.47005334091399	0	Uncharacterized protein ZK675.4
12933	T09B4.5	T09B4.5	9.75166983068883	1.325	0.13587416545115	0	None
7328	che-2	F38G1.1	9.74412764062	2.67638888888889	0.274666854499311	0	che-2 encodes a protein that contains G-protein beta-like WD-40 repeats that affects chemotaxis, dauer formation, and longevity; expressed in the cilia of most ciliated sensory neurons, some head neurons, and male tail rays.
10248	fbxb-46	K05F6.9	9.73336353783769	3.3725	0.346488650802949	0	This gene encodes a protein containing an F-box, a motif predicted to mediate protein-protein interactions either with homologs of yeast Skp-1p or with other proteins; its encoded protein also contains a Pfam-B45 motif of presently unknown function.
13938	nlp-2	T24D8.5	9.71343960262621	0.815	0.0839043668712008	0	nlp-2 is involved in embryo development, locomotion and positive regulation of error-prone translesion synthesis; nlp-2 is expressed in the intestine and the head neurons.
17460	Y66C5A.1	Y66C5A.1	9.70128616286664	1.8575	0.191469457638504	0	None
5917	F21D5.9	F21D5.9	9.69047019750969	2.10375	0.217094728854399	0	F21D5.9 is expressed in the epithelial cell.
5512	pud-2.1	F15E11.1	9.68263880469734	2.495	0.257677689969144	0	pud-2.1, along with pud-2.2, encodes a 17.4 kDa protein (CE16999) with unknown function that is seven-fold more abundant in glp-1 mutant hermaphrodites (which lack a germline) than in normal hermaphrodites; in addition, the protein products of pud-2.1/pud-2.2 are more abundant in daf-2 mutant vs. wild-type adults during a temperature shift from 15 to 25 degrees C; pud-2.1(RNAi) animals have no ob…
12406	dhs-31	T04B2.6	9.64195109911164	1.545	0.160237278131638	0	dhs-31 is an ortholog of human RDH8 (retinol dehydrogenase 8 (all-trans)) and DHRS1 (dehydrogenase/reductase (SDR family) member 1); dhs-31 is predicted to have oxidoreductase activity, based on protein domain information; dhs-31 is expressed in the hypodermis and the vulva.
3638	unc-130	C47G2.2	9.63482444001063	1.345	0.139597769359928	0	A member of the forkhead domain family of transcription factors that affects the generation of the AWA and ASG chemosensory neurons and is partially required for male tail morphogenesis and embryogenesis; it is expressed in the AWA and ASG precursors; it is required for the graded spatial expression of the UNC-129 TGF-beta guidance factor.
163	pitr-3	B0222.3	9.63480647332203	1.1675	0.121175241374356	0	pitr-3 is an ortholog of human SLC20A1 (solute carrier family 20 (phosphate transporter), member 1) and SLC20A2 (solute carrier family 20 (phosphate transporter), member 2); pitr-3 is involved in reproduction; pitr-3 is predicted to have inorganic phosphate transmembrane transporter activity, based on protein domain information; pitr-3 is expressed in the pharynx, hypodermis, and the reproductive…
403	tmc-2	B0416.1	9.63144625526096	0.95	0.0986352386570277	0	tmc-2 is an ortholog of human TMC1 (transmembrane channel-like 1), TMC2 (transmembrane channel-like 2) and TMC3 (transmembrane channel-like 3).
404	B0416.2	B0416.2	9.63140436649758	2.58333333333333	0.268219797968336	0	Uncharacterized protein B0416.2
1525	C11E4.7	C11E4.7	9.60746906019856	1.3825	0.143898459764743	0	None
14057	T26C12.3	T26C12.3	9.59256333405524	1.85	0.19285773109594	0	T26C12.3 is an ortholog of human RIT2 (Ras-like without CAAX 2) and RIT1 (Ras-like without CAAX 1); T26C12.3 is predicted to have GTP binding activity and zinc ion binding activity, based on protein domain information.
9302	ttr-50	F58B3.9	9.58302132716631	2.1725	0.226703032982022	0	None
17738	Y71H2AM.15	Y71H2AM.15	9.58245343689783	2.8075	0.292983422094132	0	Y71H2AM.15 is an ortholog of human KIAA1217 (KIAA1217); Y71H2AM.15 is involved in determination of adult lifespan and embryo development; Y71H2AM.15 is localized to the cell junction and the striated muscle dense body.
12569	dhs-4	T05F1.10	9.58111024223224	3.015	0.314681693851125	0	dhs-4 encodes a short-chain dehydrogenase predicted to be mitochondrial.
16268	nhr-114	Y45G5AM.1	9.57999438007195	1.225	0.127870638687243	0	nhr-114 encodes, by alternative splicing, two isoforms of a nuclear hormone receptor that specifically binds GPA-13 in yeast two-hybrid assays; the interaction of NHR-114 with GPA-13 is independent of whether GPA-13 is constitutively activated or not; NHR-114 is expressed in intestine (and weakly in hypodermal cells), with mainly nuclear localization; NHR-114 has no obvious function or phenotype …
3525	C46C2.5	C46C2.5	9.56002684685275	2.125	0.222279710511438	0	None
2184	C24H10.3	C24H10.3	9.54342791905632	2.465	0.258292934248279	0	None
13671	lam-3	T22A3.8	9.5123179879895	1.935	0.203420449404991	0	lam-3 encodes one of two C. elegans a laminin A subunits and is orthologous to human laminin alpha2; LAM-3 is a basement membrane component required for normal tissue development, including pharyngeal development; lam-3 is expressed in the pharynx and hypodermis, and also weakly in the intestine.
16044	dsl-3	Y41D4B.10	9.50885438756711	3.0175	0.317335809027153	0	dsl-3 encodes a putative secreted protein with single DSL and EGF domains in series, somewhat like Delta/LAG-2; DSL-3 belongs to a nematode-specific family of Delta/LAG-2-like proteins that includes DSL-1, -2, -3, -5, -6, and -7.
5196	ttr-52	F11F1.7	9.50671913945456	1.4925	0.156994224622232	0	ttr-52 encodes a transthyretin-like secreted protein that is required for proper cell corpse engulfment; genetic analysis indicates that ttr-52 functions in the ced-1/CD91 pathway for engulfment; TTR-52 binds to both surface-exposed phosphatidylserine in vivo and the extracellular domain of CED-1, therefore acting like a bridging molecule during the recognition of apoptotic cells during cell corp…
11217	M60.2	M60.2	9.50096731349413	3.2025	0.337070941761006	0	M60.2 is an ortholog of human ENDOU (endonuclease, polyU-specific); M60.2 is involved in defense response to Gram-negative bacterium and innate immune response; M60.2 is predicted to have hydrolase activity, acting on ester bonds, based on protein domain information.
2916	C34E7.4	C34E7.4	9.48053312799002	1.465	0.154527174814123	0	C34E7.4 is involved in locomotion and positive regulation of growth.
11322	R02E4.3	R02E4.3	9.47446001266682	4.88	0.515068931999894	0	None
9353	unc-42	F58E6.10	9.46803626655252	1.13	0.119348930251981	0	unc-42 encodes a paired-like homeodomain protein of the Q50 class; UNC-42 is required to specify the fate of ASH sensory neurons, AVA, AVD, and AVE interneurons, and a subset of motor neurons; unc-42 mutants fail to express cell-surface receptors required for differentiated neuronal function (sra-6, srb-6, glr-1, glr-5, and glr-6); UNC-42 is also required for AVKR and HSNL growth cones to follow …
16400	grl-5	Y47D7A.5	9.45553676613149	5.61	0.593303176620739	0	grl-5 encodes a hedgehog-like protein, with an N-terminal signal sequence, a central proline-rich low-complexity region, and a C-terminal Ground-like (Grl) domain; the Grl domain is predicted to form a cysteine-crosslinked protein involved in intercellular signalling, and it has subtle similarity to the N-terminal Hedge domain of HEDGEHOG proteins.
8071	ceh-27	F46F3.1	9.44843855117159	0.9625	0.101868683887525	0	ceh-27 encodes a homeodomain protein of the NK-2 class that contains Drosophila scarecrow and human NKX-2 (OMIM:606727); CEH-27 activity is essential for embryogenesis and appears to be required for maintaining hypodermal integrity during movement as embryos lacking CEH-27 burst at a breach in the ventral hypodermis upon commencement of muscle contractions; CEH-27 expression is first detected in …
5337	F13H10.5	F13H10.5	9.43480036039613	2.845	0.301543211443273	0	F13H10.5 is an ortholog of human ENPP7 (ectonucleotide pyrophosphatase/phosphodiesterase 7), ENPP6 (ectonucleotide pyrophosphatase/phosphodiesterase 6), ENPP4 (ectonucleotide pyrophosphatase/phosphodiesterase 4 (putative)) and ENPP5 (ectonucleotide pyrophosphatase/phosphodiesterase 5 (putative)); F13H10.5 is predicted to have catalytic activity, based on protein domain information.
8852	wago-2	F55A12.1	9.42293518722326	0.9975	0.105858735116053	0	wago-2 is an ortholog of members of the human AGO, PIWIL (Argonaute/PIWI) family including AGO1; wago-2 is involved in embryo development and reproduction; wago-2 is predicted to have nucleic acid binding activity, based on protein domain information.
19133	ZK822.2	ZK822.2	9.41889763089114	1.2275	0.130323106599457	0	None
16750	Y51H4A.1	Y51H4A.1	9.40460507322222	2.4175	0.25705491949719	0	None
4300	D1086.10	D1086.10	9.38419389678266	1.055	0.11242308200406	0	non-coding Transcript Isoform
10046	K02G10.5	K02G10.5	9.37885093718255	1.415	0.15087136041263	0	K02G10.5 is an ortholog of human SLCO4C1 (solute carrier organic anion transporter 4C1) and SLCO4A1 (solute carrier organic anion transporter 4A1); K02G10.5 is predicted to have transporter activity, based on protein domain information.
11208	nphp-1	M28.7	9.37849630229956	2.8875	0.307885177636846	0	nphp-1 encodes a novel, SH3 domain-containing protein that is orthologous to mammalian nephrocystin-1 (OMIM:607100, mutated in juvenile nephronophthisis); nphp-1 along with nphp-4 is required for the proper assembly and structure of cilia; both NPHP-1 and NPHP-4 but not NPHP-1 alone is required for the proper localization of the IFT-B polypeptide OSM-6, the OSM-3-kinesin, and the BBS proteins BBS…
12738	mam-5	T07C12.8	9.3780961185571	3.7925	0.404399779236162	0	None
5187	elo-2	F11E6.5	9.32296532965881	1.2175	0.130591497120215	0	elo-2 encodes a palmitic acid elongase, homologous to polyunsaturated fatty acid (PUFA) elongases such as ELO-1, that is required for normally rapid growth, normally large body size, fertility, and for the quantitative regulation of the ultradian defecation rhythm; the joint action of ELO-2 with ELO-1 is strongly required for 20-carbon PUFA production and for general viability; loss of el-2 activ…
7143	F36H1.11	F36H1.11	9.29158940257035	4.0725	0.438299608770208	0	None
3618	dhp-2	C47E12.8	9.2276546762092	1.0175	0.110266371651653	0	The dhp-2 gene encodes an ortholog of the human gene DIHYDROPYRIMIDINASE (DPYS), which when mutated leads to dihydropyrimidinuria (OMIM:222748).
9070	dhs-5	F56D1.5	9.21590497386756	1.4425	0.1565228812678	0	dhs-5 encodes a possible steroid dehydrogenase; DHS-5 generally resembles short chain-type alcohol/other dehydrogenases, but has two predicted N-terminal transmembrane sequences, and its closest relatives in vertebrates are known or putative steroid dehydrogenases such as hydroxysteroid (17-beta) dehydrogenase 12 from mouse (also known as KIK-I or DHBK_MOUSE).
12509	phat-5	T05B4.11	9.20169210041337	3.5825	0.389330566694256	0	phat-5 is expressed in the g1AR and the g1AL.
9880	K01A2.3	K01A2.3	9.08278233907097	2.0075	0.221022581523773	0	K01A2.3 is expressed in the intestine.
5723	jmjd-3.1	F18E9.5	9.07572845282354	1.4825	0.163347769570913	0	jmjd-3.1 encodes, by alternative splicing, two isoforms of a histone H3 trimethyllysine-27 (H3K27me3) demethylase that is required for normal gonad migration and organization; JMJD-3.1 demethylates H3K27me3 in vitro; JMJD-3.1 contains an N-terminal TonB domain and a C-terminal JmjC domain, and is homologous to human JMJD3, UTX (OMIM:300128), and UTY (OMIM:400009); null jmjd-3.1(gk384) and jmjd-3.…
9707	tbh-1	H13N06.6	9.07376723333252	1.225	0.13500456519316	0	tbh-1 encodes a tyramine beta-hydroxylase orthologous to human DBH (OMIM:609312, mutated in dopamine beta-hydroxylase deficiency); TBH-1 activity is required for biosynthesis of the octopamine neurotransmitter.
10822	egl-46	K11G9.4	9.04710020278317	1.17	0.129323205643292	0	egl-46 encodes a transcription factor with similarity to the TFIIA-like zinc-finger protein family; egl-46 activity is required for coordinated locomotion, morphology and process formation of the touch cells, male mating efficiency, HSN cell migration, differentiation, and axonal outgrowth, serotonin production and also terminal divisions of the Q neuroblasts; egl-46 acts to inhibit touch cell fa…
18635	wrt-10	ZK1290.8	9.02291265557047	2.81	0.311429369568949	0	wrt-10 encodes a hedgehog-like protein, with an N-terminal signal sequence, a Wart domain, and a C-terminal region of low-complexity sequence; WRT-10 is expressed in both male and hermaphrodite intestine; the Wart domain is predicted to form a cysteine-crosslinked protein involved in intercellular signalling, and it has subtle similarity to the N-terminal Hedge domain of HEDGEHOG proteins; WRT-10…
16830	cutl-2	Y53C12B.6	8.97049882464667	4.1925	0.467365314009183	0	None
3147	C38C6.3	C38C6.3	8.95967855641875	4.11	0.458721813971281	0	None
17070	Y55D5A.1	Y55D5A.1	8.94192618383509	1.4575	0.162996201269791	0	Y55D5A.1 is involved in axonal fasciculation, locomotion and oviposition; Y55D5A.1 is expressed in certain amphid neurons, certain sensory neurons, and the intestine.
15893	Y39B6A.7	Y39B6A.7	8.93516811505995	0.795	0.0889742632441411	0	None
1937	nas-37	C17G1.6	8.92135541530367	0.8975	0.100601305319641	0	nas-37 encodes a Astacin-class metalloprotease required for full ecdysis that is expressed in hypodermal cells 4 hours before each ecdysis; NAS-37 protein has an N-terminal signal sequence followed by an Astacin protease domain and three protein-binding domains (EGF-like, CUB, and thrombospondin); NAS-37 accumulates in anterior cuticle, being shed with it after ecdysis; nas-37 mutants fail to com…
8405	hst-3.2	F52B10.2	8.91269449200512	2.3975	0.268998337388386	0	hst-3.2 is an ortholog of members of the human Sulfotransferases, membrane-bound family including HS3ST4; hst-3.2 is involved in heparan sulfate proteoglycan biosynthetic process; hst-3.2 is predicted to have sulfotransferase activity, based on protein domain information; hst-3.2 is expressed in the epithelial cell, hypodermis, nervous system, and the vulva; hst-3.2 is localized to the Golgi lume…
7445	lbp-3	F40F4.4	8.90735403023379	1.45	0.162786838277488	0	lbp-3 encodes a predicted secreted fatty acid binding protein (FABP) that is similar to the Ascaris suum secreted FABP As-p18; by homology, LBP-3 is predicted to function in sequestering or transporting small hydrophobic molecules such as lipids and steroid hormones; an lbp-3::gfp promoter fusion is expressed in the embryo, with expression seen in presumptive hypodermal cells by the comma stage a…
16853	Y53F4B.27	Y53F4B.27	8.87603135531277	4.135	0.465861355652488	0	None
16020	Y41C4A.11	Y41C4A.11	8.86557363022714	1.6775	0.189215054768771	0	Y41C4A.11 encodes a divergent paralog of F38E11.5, the beta' (beta-prime) subunit of the coatomer (COPI) complex.
16777	Y51H7C.12	Y51H7C.12	8.85383392277822	1.5425	0.174218311914753	0	None
8818	F54F7.3	F54F7.3	8.82016465951128	1.7925	0.203227498487463	0	None
10119	ttr-2	K03H1.4	8.81692928256875	1.8225	0.206704618080937	0	K03H1.4 encodes a protein containing a predicted signal sequence followed by a transthyretin-like domain; the product of K03H1.4 belongs to a family of apparently nematode-specific proteins whose function is not yet known.
12482	cki-1	T05A6.1	8.81625753634265	2.39	0.271090084443186	0	cki-1 encodes a homolog of the mammalian cyclin-dependent kinase inhibitor p27/KIP1 that is required for the arrest of cell division in larval blast lineages, dauer larvae and starved L1 larvae; excess CKI-1 expression prematurely stops cell division while cki-1(RNAi) induces extra cell divisions, indicating that CKI-1 quantitatively regulates the amount of mitosis in postembryonic worms.
2027	C18D11.6	C18D11.6	8.80957490741675	2.12	0.240647252822061	0	None
5516	pud-1.1	F15E11.13	8.78599949500798	2.7775	0.316127948969052	0	pud-1.1, along with pud-1.2, encodes a protein (CE25224) of unknown function; the PUD-1.1/PUD-1.2 proteins are present at significantly higher levels in daf-2 mutant vs. wild-type adults during a temperature shift from 15 to 25 degrees C; pud-1.1(RNAi) animals have no obvious mutant phenotype (i. e., they have no obvious defect in fertility or germline maintenance); the PUD-1.1/PUD-1.2 proteins b…
1599	spin-1	C13C4.5	8.73267839334778	1.015	0.11623009050387	0	spin-1 is an ortholog of human SPNS3 (spinster 3 (Drosophila)), SPNS2 (spinster 2 (Drosophila)) and SPNS1 (spinster 1 (Drosophila)); spin-1 is involved in lipid storage; spin-1 is expressed in the pharynx, hypodermis, nervous system, tail, reproductive system, pharyngeal-intestinal valve, intestine, and the excretory cell.
648	C01G6.9	C01G6.9	8.6994546583286	3.2525	0.373874010238809	0	C01G6.9 is involved in lipid storage.
14906	Y102A11A.5	Y102A11A.5	8.68346004715753	3.485	0.401337713431501	0	None
12842	acs-3	T08B1.6	8.6748491969717	1.595	0.183864867709377	0	acs-3 is an ortholog of human ACSL5 (acyl-CoA synthetase long-chain family member 5); acs-3 is involved in embryo development; acs-3 is predicted to have catalytic activity, based on protein domain information; acs-3 is expressed in the head, tail, seam cell, intestine, excretory cell, and the vulva.
13554	T20F5.4	T20F5.4	8.66994124540771	3.465	0.399656687620039	0	None
12808	bath-46	T07H3.2	8.66612578334277	2.4925	0.287614103731434	0	None
10746	K10D6.2	K10D6.2	8.66470532064846	1.81	0.208893428341605	0	K10D6.2 encodes three isoforms of a claudin homolog that may be required for normal cohesion of apical junctions in epithelia; K10D6.2A-C are worm-specific, with obvious homologs only in C. elegans; K10D6.2A-C are required for embryonic viability in mass RNAi assays; claudins are integral membrane proteins with four transmembrane sequences that are found in mammalian tight junctions (TJs), induce…
16832	eyg-1	Y53C12C.1	8.66301828795892	1.425	0.164492322725518	0	eyg-1 encodes a divergent paired-like homeodomain protein that does not belong to the Q50, K50, or S50 classes; it has no obvious function in mass RNAi assays.
19122	ZK813.1	ZK813.1	8.65477833814502	1.135	0.131141429122177	0	None
12491	hmg-11	T05A7.4	8.64764077126692	1.8325	0.211907507315609	0	hmg-11 is predicted to have DNA binding activity, based on protein domain information; hmg-11 is expressed in the pharynx, anal depressor muscle, hypodermis, nervous system, head, reproductive system, intestine, rectal epithelium, excretory cell, and the body wall musculature.
10236	K05F1.5	K05F1.5	8.63068057382631	1.2275	0.142225168629524	0	K05F1.5 is an ortholog of human LECT2 (leukocyte cell-derived chemotaxin 2); K05F1.5 is involved in striated muscle myosin thick filament assembly.
8987	F55H12.5	F55H12.5	8.61718915071091	1.1875	0.137805957282722	0	F55H12.5 is predicted to have protein tyrosine phosphatase activity, based on protein domain information.
7170	math-28	F36H5.3	8.60610647197873	1.1075	0.128687694441847	0	None
14660	pitr-6	W05H5.3	8.60465237845398	1.08	0.125513495780994	0	pitr-6 is an ortholog of human SLC20A1 (solute carrier family 20 (phosphate transporter), member 1) and SLC20A2 (solute carrier family 20 (phosphate transporter), member 2); pitr-6 is predicted to have inorganic phosphate transmembrane transporter activity, based on protein domain information.
12908	ast-1	T08H4.3	8.60461318924737	1.96	0.227784789030294	0	ast-1 encodes one of ten C. elegans ETS-box transcription factors; AST-1 is required cell autonomously for proper initiation and maintenance of dopamine (DA) neuron fate; AST-1 acts to specify DA neuron fate by positively regulating expression of a number of DA neuron-specific genes such as dat-1 and cat-2, which encodes a dopamine transporter and tyrosine hydroxylase, respectively; AST-1 is also…
11211	M4.1	M4.1	8.59476000516347	1.105	0.128566708010014	0	M4.1 is an ortholog of human SLMAP (sarcolemma associated protein); M4.1 is involved in reproduction.
12192	T01D1.8	T01D1.8	8.59189299776002	2.285	0.265948377219749	0	None
9881	K01A2.4	K01A2.4	8.55910855325008	1.4925	0.174375636284373	0	K01A2.4 is involved in reproduction.
13355	T16G1.6	T16G1.6	8.55364043033837	3.2775	0.383170186623141	0	T16G1.6 is expressed in the intestine and the head neurons.
11961	R12E2.7	R12E2.7	8.53064716288059	4.0475	0.474465761239299	0	R12E2.7 is expressed in the anal depressor muscle, vulval cell, hypodermis, intestinal muscle, anal sphincter muscle, rectal muscle, body wall musculature, and the vulC.
4301	D1086.11	D1086.11	8.52851336115025	1.5575	0.182622683936317	0	None
6976	F35D2.2	F35D2.2	8.52465312225761	2.0325	0.238426123720296	0	None
16907	Y54B9A.1	Y54B9A.1	8.50197472390905	0.9775	0.114973289352543	0	None
3190	C39D10.7	C39D10.7	8.49385030712131	1.13	0.133037428155827	0	C39D10.7 encodes a large (1185-residue) protein with 11 chitin-binding peritrophin-A domains; C39D10.7 transcripts are enriched in hermaphrodites; like CEJ-1 and CPG-2, C39D10.7 might participate in eggshell synthesis and early embryonic development, and C39D10.7's multiple peritrophin-A domains might enable mechanical cross-linking of chitin; however, C39D10.7 alone has no visible function in ma…
10251	aptf-1	K06A1.1	8.49344281237963	2.29925	0.270708833954674	0	aptf-1 encodes one of four C. elegans AP-2-like transcription factors; APTF-1 activity is required in the RIS interneuron for sleep-like quiescence induced by neuropeptide signaling; aptf-1 is expressed in five head interneurons.
4768	F07H5.13	F07H5.13	8.47512264426527	2.425	0.286131552519878	0	None
17546	grd-16	Y69A2AL.1	8.47193298152045	2.7375	0.32312578557588	0	grd-16 is expressed in the hypodermis, nervous system, and the intestine.
5441	F14H12.6	F14H12.6	8.46633403298167	0.955	0.112799707202631	0	None
1455	C10A4.3	C10A4.3	8.43734076562773	1.4525	0.172151397027513	0	None
18762	ZK328.7	ZK328.7	8.43558893741896	2.25	0.266727079364826	0	ZK328.7 is an ortholog of human TTC21A (tetratricopeptide repeat domain 21A) and TTC21B (tetratricopeptide repeat domain 21B); ZK328.7 is expressed in all sensory neurons, head neurons, tail neurons, and the ciliated neurons.
12195	T01D3.3	T01D3.3	8.43196690991742	1.9625	0.232745220773076	0	T01D3.3 is predicted to have metal ion binding activity and peptidase inhibitor activity, based on protein domain information.
9555	F59F4.2	F59F4.2	8.40059443601763	1.055	0.125586350827351	0	F59F4.2 is an ortholog of human SERP2 (stress-associated endoplasmic reticulum protein family member 2) and SERP1 (stress-associated endoplasmic reticulum protein 1); F59F4.2 is expressed in the pharynx, nervous system, seam cell, intestine, and the body wall musculature.
2559	unc-86	C30A5.7	8.37872954036428	2.7175	0.324333180455166	0	unc-86 encodes a transcription factor with a POU-type homeodomain that is required for correct fate determination and differentiaion in diverse neuronal lineages, including those of egg-laying neurons, mechanosensory neurons, and chemosensory interneurons; UNC-86 is orthologous to human BRN-3; UNC-86 is required for tph-1 and cat-1 expression in specific serotonergic neurons, as well as for neuri…
8557	F53B3.3	F53B3.3	8.37712158430088	2.4375	0.29097106631089	0	F53B3.3 is expressed in the pharynx.
1240	C08A9.10	C08A9.10	8.3580429557886	1.9825	0.237196675165083	0	None
373	B0393.5	B0393.5	8.32989603328189	2.0275	0.243400396823583	0	B0393.5 is predicted to have calcium ion binding activity, based on protein domain information.
8787	F54E2.2	F54E2.2	8.32512852248574	1.755	0.210807556334997	0	F54E2.2 is predicted to have peptidase inhibitor activity, based on protein domain information.
14551	W03G11.4	W03G11.4	8.32356556898749	0.83	0.0997168813197641	0	None
2784	C33D9.13	C33D9.13	8.32194199358706	1.38	0.165826678564142	0	C33D9.13 is involved in embryo development, mitotic nuclear division and striated muscle myosin thick filament assembly.
13193	sqst-1	T12G3.1	8.31644414812971	1.1025	0.132568677233039	0	sqst-1 encodes a protein with similarity to mammalian sequestosome 1(SQSTM1)/p62, a signal transduction or adaptor protein involved in receptor-mediated signalling pathways; SQST-1 is weakly expressed in embryos and exhibits a diffuse, cytoplasmic localization; SQST-1 is selectively removed by autophagy during embryogenesis.
14280	jmjc-1	T28F2.4	8.31547002781392	1.1975	0.144008696561295	0	jmjc-1 is an ortholog of human MINA (MYC induced nuclear antigen) and C14orf169 (chromosome 14 open reading frame 169).
14303	srm-1	T28H11.2	8.28991957861185	2.1775	0.262668410634283	0	7TM GPCR, serpentine receptor class M (Srm)
12435	sdz-30	T04D3.2	8.27260510746432	3.3675	0.407066450804176	0	sdz-30 is involved in body morphogenesis, embryo development, hermaphrodite genitalia development, lipid storage, locomotion, nematode larval development and reproduction; sdz-30 is localized to the cytoplasm.
6978	mks-3	F35D2.4	8.26357966811313	1.32	0.159737069528538	0	mks-3 encodes a transmembrane domain protein homologous to the human ciliopathy protein MKS-3/tmem67/meckelin; MKS-3 is required for cilia-mediated chemosensory reception and for the normal length of cilia; in regulating cilia organization and function, mks-3 functions in the same pathway as other mks (Meckel-Gruber Syndrome (MKS) homolog genes), including mks-1, but in parallel to the nphp (neph…
4294	unc-120	D1081.2	8.25585884427915	1.8175	0.220146690281584	0	unc-120 encodes a member of the MADS-box family of transcription factors that is most closely related to Drosophila blistered and the vertebrate serum response factors (SRFs); UNC-120 is required for locomotion and muscle development and for formation of the normal number of muscle A and I bands; UNC-120 is also required for maintaining wild-type expression levels of the muscle components actin a…
4311	D1086.6	D1086.6	8.24655246890626	1.14	0.138239586093508	0	None
7816	ppt-1	F44C4.5	8.24253932358067	2.025	0.245676716907711	0	ppt-1 encodes the C. elegans palmitoyl protein thioesterase-1 ortholog; by homology PPT-1 is predicted to function in degradation of palmitoylated proteins and ppt-1 mutations result in loss of enzymatic activity from mixed-stage extracts; in C. elegans, ppt-1 activity is essential for mitochondrial organization and biogenesis in neuronal and muscle cells, as well as for proper timing of the onse…
19103	inx-8	ZK792.2	8.2422364618749	0.995	0.120719662024069	0	inx-8 encodes an innexin; that affects fertility; inx-8 is expressed in a variety of tissues, including the gonadal sheath cells.
8445	F52D1.2	F52D1.2	8.22517416081669	1.09	0.13251999029912	0	None
14146	fbxa-137	T27B7.7	8.22268763713778	2.365	0.28761885460886	0	non-coding Transcript Isoform
8113	F46H6.5	F46H6.5	8.21787129769231	1.8275	0.222381190188898	0	None
985	C05D12.4	C05D12.4	8.1987680921675	1.725	0.210397462229471	0	None
15735	nspe-7	Y38E10A.15	8.18817566053068	3.3775	0.412485044291429	0	None
8961	F55G1.15	F55G1.15	8.18537706655852	1.475	0.180199395581437	0	None
2665	C31H2.4	C31H2.4	8.18435603678378	1.4475	0.17686180726918	0	C31H2.4 encodes a possible 4-hydroxyphenylpyruvate dioxygenase, orthologous to human HPDL/GLOXD1, and paralogous to HPD-1 and human HPD (OMIM:609695, mutated in tyrosinemia type III); C31H2.4 has no obvious function in mass RNAi experiments.
10342	tos-1	K07B1.6	8.1840506175403	0.93	0.11363566080674	0	tos-1 is involved in nematode larval development.
2349	C26F1.1	C26F1.1	8.17975541204179	1.915	0.234114579658561	0	None
2813	C33G3.4	C33G3.4	8.13480877108467	1.53	0.188080635089839	0	C33G3.4 is orthologous to the human gene BETA-MANNOSIDASE (MANBA; OMIM:248510), which when mutated leads to disease.
2446	nex-3	C28A5.3	8.13319301444397	2.005	0.24652064649631	0	nex-3 encodes an annexin, a member of a family of calcium-dependent phospholipid binding proteins; by homology, NEX-3 could function in a number of processes, such as membrane fusion, cytoskeletal interactions, and intracellular signaling; however, as loss of nex-3 function via RNA-mediated interference (RNAi) does not result in any abnormalities, the precise role of NEX-3 in C. elegans developme…
4841	cyp-14A5	F08F3.7	8.12424032855677	2.7625	0.340031792300603	0	cyp-14A5 encodes one of ~80 C. elegans cytochrome P450s: membrane-associated, heme-containing NADPH-dependent monooxygenases that catalyze the oxidative metabolism of a variety of exogenous compounds and endogenous substrates; cyp-14A5 expression is upregulated in response to stressors such as ionizing radiation and bacterial infection.
11005	aqp-7	M02F4.8	8.12320301412415	0.8275	0.101868683887525	0	aqp-7 encodes an aquaglyceroporin whose expression in Xenopus oocytes increases either water or glycerol permeability five- to seven-fold; AQP-7 has no function in mass RNAi assays, perhaps reflecting genetic redundancy with its several paralogs; AQP-7 is expressed in muscle punctae (perhaps focal adhesions).
14536	W03F9.4	W03F9.4	8.10588803782114	1.8325	0.226070233322958	0	W03F9.4 is an ortholog of human CPT1A (carnitine palmitoyltransferase 1A (liver)) and CPT1C (carnitine palmitoyltransferase 1C); W03F9.4 is predicted to have transferase activity, transferring acyl groups, based on protein domain information.
18446	ZC513.7	ZC513.7	8.04994831904105	0.905	0.11242308200406	0	None
6860	F33D4.6	F33D4.6	8.02967812807112	2.29	0.285192004396084	0	F33D4.6 is an ortholog of human GOLIM4 (golgi integral membrane protein 4); F33D4.6 is involved in body morphogenesis, embryo development, lipid storage, nematode larval development and reproduction.
4167	lron-15	C56E6.6	8.02432024514599	1.9975	0.248930742913496	0	lron-15 is an ortholog of human ELFN2 (extracellular leucine-rich repeat and fibronectin type III domain containing 2), NRROS (negative regulator of reactive oxygen species), LRRC26 (leucine rich repeat containing 26), LRG1 (leucine-rich alpha-2-glycoprotein 1), CPN2 (carboxypeptidase N, polypeptide 2), LRRTM2 (leucine rich repeat transmembrane neuronal 2), LGI3 (leucine-rich repeat LGI 3), LGI1 …
7421	hch-1	F40E10.1	7.99536204852985	3.9375	0.492473008239072	0	hch-1 encodes a member of the zinc-dependent metalloprotease family that contains an epidermal growth factor-like domain, a CUB domain, and a TSP1 domain and affects hatching and QL neuroblast migration.
7848	F44E5.3	F44E5.3	7.9839437805005	1.835	0.229836287735604	0	None
6869	F33E2.5	F33E2.5	7.96342332382443	1.1675	0.146607803268119	0	None
5177	F11D5.1	F11D5.1	7.96248450854934	1.1225	0.140973586673201	0	None
14139	pat-9	T27B1.2	7.95948023463354	1.2825	0.16112861169245	0	pat-9 is an ortholog of members of the human Zinc fingers, C2H2-type family including ZNF740; pat-9 is involved in embryo development, locomotion, nematode larval development and functions in striated muscle contraction involved in embryonic body morphogenesis; pat-9 is predicted to have nucleic acid binding activity, based on protein domain information; pat-9 is expressed in the gonad and the bo…
2253	srsx-34	C25E10.3	7.95759056927265	0.9275	0.116555380919124	0	srsx-34 is predicted to have G-protein coupled receptor activity, based on protein domain information; srsx-34 is expressed in the nervous system.
18375	ZC416.6	ZC416.6	7.95174332001747	1.1825	0.148709528515994	0	ZC416.6 encodes a protein with similarity to bifunctional leukotriene A4 hydrolases/aminopeptidases; loss of ZC416.6 activity via RNAi results in decreased intestinal dipeptide transport, increased fat storage, and increased free fatty acid uptake, a phenotype that mimics loss-of-function mutations in the PEPT-1 intestinal peptide transporter; the product of ZC416.6 is predicted to regulate PEPT-…
4559	EEED8.2	EEED8.2	7.94962410623031	1.725	0.216991391913496	0	EEED8.2 is involved in lipid storage; EEED8.2 is predicted to have lipid binding activity and transporter activity, based on protein domain information; EEED8.2 is expressed in the hypodermis and the intestine.
13498	T19H5.7	T19H5.7	7.94643780517461	1.655	0.208269420912385	0	None
255	B0284.3	B0284.3	7.94509078461299	1.095	0.137820955063302	0	None
17235	anoh-2	Y57G11C.37	7.94005234571516	0.8475	0.106737331581618	0	anoh-2 is an ortholog of human ANO8 (anoctamin 8); anoh-2 is expressed in the spermatheca and the nervous system.
14288	ifta-2	T28F3.6	7.93928830736334	2.69	0.338821301842023	0	ifta-2 encodes a ciliary protein, orthologous to human RABL5, that is required for normally short life span and dauer formation; IFTA-2 is expressed in amphid, labial, and phasmid ciliated sensory neurons; intracellularly, IFTA-2 resides in the bases and axonemes of cilia, colocalizing with DAF-2 and AGE-1; IFTA-2 may be either a cargo or a cargo-docking component of intraflagellar transport (IFT…
9183	F57B1.6	F57B1.6	7.9372745378726	2.31	0.291031888714176	0	None
9859	bus-12	JC8.12	7.90312111152797	2.4225	0.306524468727474	0	bus-12 encodes a predicted nucleotide-sugar transporter and is most similar to sqv-7 within the elegans genome, which encodes a protein that can transport UDP-glucuronic acid, UDP-N acetylgalactosamine, and UDP-galactose, when expressed in yeast cells, and UDP-galactose when expressed in canine cells; bus-12 mutants show little or no infection when grown in the presence of the nematode-specific p…
6648	F31B12.4	F31B12.4	7.89508245552904	2.195	0.278021162206205	0	None
17592	ubc-19	Y69H2.6	7.89418747123634	0.6575	0.0832891291720269	0	ubc-19 encodes a predicted conjgating enzyme (UBCs/E2s) of the ubiquitin-conjugation system with a potentially low effect on embryonic viability, based on RNAi analysis.
14110	T26H5.9	T26H5.9	7.88682856180701	2.4625	0.312229431729374	0	None
14576	W04B5.2	W04B5.2	7.87613144935306	1.0275	0.130457446857924	0	None
1703	hsp-43	C14F11.5	7.86136621423862	1.385	0.176178028380292	0	hsp-43 encodes a member of the hsp20 family.
9478	F59B10.2	F59B10.2	7.82468885534494	2.8075	0.358800209427144	0	Uncharacterized protein F59B10.2
14772	fat-3	W08D2.4	7.80057583742822	0.785	0.100633596334448	0	fat-3 encodes a delta-6 fatty acid desaturase ('linoleoyl-CoA desaturase') containing an N-terminal cytochrome b5 domain that is orthologous to the vertebrate fatty acid desaturases (FADS); FAT-3 expressed in yeast uses linoleic and alpha-linolenic acid as substrates; FAT-3 is absolutely required in vivo for synthesis of delta-6 fatty acids, and also required for fully normal synthesis of C20 fat…
6549	F28H7.3	F28H7.3	7.79809699005788	1.5425	0.197804669776049	0	None
8663	F53H4.2	F53H4.2	7.79605276132181	1.3625	0.174767929580942	0	None
1624	C14A11.2	C14A11.2	7.79405686372551	2.1875	0.280662566138167	0	None
2978	lev-8	C35C5.5	7.78918508937578	1.595	0.204771100146989	0	lev-8 encodes a novel nicotinic acetylcholine receptor (nAChR) alpha subunit that is a member of the ACR-8 group of nAChR subunits; LEV-8 activity is required for normal rates of pharyngeal pumping and for fully wild-type responses (increased egg laying and body wall muscle contraction) to the nAChR agonist and antihelmintic levamisole; expression of a LEV-8::GFP reporter construct begins at the …
18625	wrt-1	ZK1290.12	7.78582982745391	3.8975	0.500588901424082	0	wrt-1 is an ortholog of human IHH (indian hedgehog), DHH (desert hedgehog) and SHH (sonic hedgehog); wrt-1 is involved in locomotion, the molting cycle and positive regulation of growth; wrt-1 is predicted to have peptidase activity, based on protein domain information; wrt-1 is expressed in the hyp10, hyp9, hyp8, hyp6, and the hyp7 syncytium.
9878	cbn-1	K01A2.11	7.78440615515317	2.61	0.335285691416836	0	cbn-1 encodes a protein that contains a predicted signal peptide and calcium-binding EF-hand motifs.
3108	mig-6	C37C3.6	7.76780716650335	1.5325	0.197288625625068	0	mig-6 encodes at least two protein isoforms (long and short) that are highly similar to the extracellular matrix proteins papilin and lacunin; mig-6 is an essential gene required for embryonic hypodermal cell enclosure and normal excretory canal cell function in L1 larvae; MIG-6(S) activity is required cell nonautonomously for the ventral to dorsal phase of distal tip cell (DTC) migration and app…
269	B0286.1	B0286.1	7.74996260437994	1.155	0.149032977184592	0	Uncharacterized protein B0286.1
6614	F30A10.2	F30A10.2	7.74417761919879	2.515	0.324760113167472	0	F30A10.2 is involved in embryo development and nematode larval development.
4492	E02H9.7	E02H9.7	7.73860193110612	1.6075	0.20772485964661	0	None
379	mboa-1	B0395.2	7.73673721559984	2.33025	0.301192858832201	0	mboa-1 encodes a putative acyl-Coenzyme A:cholesterol ('sterol') O-acyltransferase, orthologous to human SOAT1 (OMIM:102642); MBOA-1 is required for normal locomotion and normally long lifespan in mass RNAi assays; mboa-1 is expressed in the seam cells and nervous systems of larvae and adults, and in the adult reproductive system.
8297	fbxb-67	F49B2.2	7.73105318487533	0.8675	0.112209808839129	0	This gene encodes a protein containing an F-box, a motif predicted to mediate protein-protein interactions either with homologs of yeast Skp-1p or with other proteins; its encoded protein also contains a Pfam-B45 motif of presently unknown function.
16277	fbxc-51	Y46B2A.1	7.7298984454348	2.1475	0.277817362693593	0	None
5889	F21C10.10	F21C10.10	7.72902599375815	1.0375	0.134234249029292	0	F21C10.10 is predicted to have 3-hydroxyacyl-CoA dehydrogenase activity, based on protein domain information; F21C10.10 is localized to the mitochondrion.
12160	T01B7.9	T01B7.9	7.69894840497974	2.4125	0.31335448337848	0	None
7391	igcm-1	F39H12.4	7.69785804012044	2.5425	0.330286683223925	0	igcm-1 encodes a protein containing immunoglobulin and fibronectin repeats; igcm-1 promoter::gfp fusions are expressed in the labial neurons, including the sheath and socket cells, as well as in the pharynx and lateral hypodermis.
3218	C40A11.2	C40A11.2	7.69508387735429	2.2425	0.291419825402996	0	C40A11.2 is an ortholog of human KCTD10 (potassium channel tetramerization domain containing 10), TNFAIP1 (tumor necrosis factor, alpha-induced protein 1 (endothelial)) and KCTD13 (potassium channel tetramerization domain containing 13).
2954	ugt-33	C35A5.2	7.69386005237836	2.1125	0.274569589987145	0	ugt-33 is an ortholog of human UGT3A2 (UDP glycosyltransferase 3 family, polypeptide A2) and UGT3A1 (UDP glycosyltransferase 3 family, polypeptide A1); ugt-33 is predicted to have transferase activity, transferring hexosyl groups, based on protein domain information.
8606	F53F1.6	F53F1.6	7.68927889675001	1.845	0.23994447655941	0	None
8044	F46C8.3	F46C8.3	7.68785407911094	0.9775	0.127148615197577	0	None
12966	T09F5.1	T09F5.1	7.6731938792347	1.41	0.183756597603478	0	T09F5.1 is an ortholog of human B3GALT4 (UDP-Gal:betaGlcNAc beta 1,3-galactosyltransferase, polypeptide 4); T09F5.1 is predicted to have galactosyltransferase activity, based on protein domain information.
6058	F22F4.1	F22F4.1	7.66570566960204	3.115	0.4063552834219	0	F22F4.1 is involved in embryo development and oviposition.
13441	T19C4.1	T19C4.1	7.65187656455446	3.8525	0.503471268452736	0	None
2693	C32C4.1	C32C4.1	7.6419344161736	0.8575	0.112209808839129	0	C32C4.1 is an ortholog of human KCNS2 (potassium voltage-gated channel, modifier subfamily S, member 2); C32C4.1 is involved in lipid storage; C32C4.1 is predicted to have voltage-gated potassium channel activity, based on protein domain information.
3526	C46C2.6	C46C2.6	7.63839029457768	1.2875	0.168556456314358	0	None
5254	F13A7.12	F13A7.12	7.62811370128333	2.0325	0.266448571638105	0	None
7444	lbp-1	F40F4.3	7.61992673457131	1.605	0.210631946461923	0	lbp-1 encodes a predicted secreted fatty acid binding protein (FABP) that is similar to the Ascaris suum secreted FABP As-p18; by homology, LBP-1 is predicted to function in sequestering or transporting small hydrophobic molecules such as lipids and steroid hormones; an lbp-1::gfp promoter fusion is expressed in the embryo, beginning at gastrulation, in presumptive hypodermal precursors; lbp-1::g…
2366	ceh-2	C27A12.5	7.60550506959634	1.715	0.225494557469413	0	ceh-2 encodes a homeodomain protein homologous to Drosophila empty spiracles (EMS) and the vertebrate EMX1 and EMX2 proteins (OMIM:600034, 600035); although the exact biological role of CEH-2 in C. elegans development and/or behavior is not yet known, expression in pharyngeal neurons and muscle, as well as vulval cells (vulB1, vulB2, and vulC) at late stages of development suggests that CEH-2 may…
17071	linc-143	Y55D5A.11	7.59106779428842	1.2	0.158080527340685	0	C. elegans lincRNA gene
6430	slc-28.1	F27E11.1	7.58278693895186	1.09	0.14374662096871	0	slc-28.1 is an ortholog of human SLC28A1 (solute carrier family 28 (concentrative nucleoside transporter), member 1), SLC28A2 (solute carrier family 28 (concentrative nucleoside transporter), member 2) and SLC28A3 (solute carrier family 28 (concentrative nucleoside transporter), member 3); slc-28.1 is predicted to have nucleoside:sodium symporter activity, based on protein domain information.
3329	dyf-7	C43C3.3	7.57998087458583	1.4925	0.196900232954948	0	dyf-7 encodes a protein containing a single-pass transmembrane domain, a small cytoplasmic domain, and a large extra-cellular/luminal domain related to that of zona pellucida (ZP) proteins, components of the matrix surrounding vertebrate oocytes to which sperm bind; dyf-7 is required for anchoring dendritic tips during cell body migration: in dyf-7 embryos, neurons are born at the proper position…
13010	cyp-13A9	T10B9.6	7.5787608676854	1.6825	0.222001990744147	0	None
212	asm-1	B0252.2	7.57741214766175	0.825	0.108876221053197	0	asm-1 encodes a protein similar to human acid sphingomyelinase (ASM) or sphingomyelin phosphodiesterase; the ASM-1 protein has a putative secretory signal peptide at the N-terminus, saposin-like and proline-rich domains and putative N-linked glycosylation sites; asm-1 shows phosphodiesterase activity when expressed in COS-7 cells; while mammalian ASM is detected as both intracellular and secreted…
11591	fbxc-24	R07C3.11	7.57111093778005	2.705	0.357279139379926	0	None
18310	cuti-1	ZC328.1	7.56201498796997	1.5475	0.204641223597393	0	cuti-1 is involved in body morphogenesis, collagen and cuticulin-based cuticle development, embryo development, locomotion, the molting cycle, nematode larval development and reproduction; cuti-1 is expressed in the anus, hypodermis, excretory pore, and the vulva; cuti-1 is localized to the cytoplasm.
1899	C17E4.1	C17E4.1	7.53756627330971	1.585	0.210280074831638	0	None
9239	F57F5.1	F57F5.1	7.52779449433829	1.085	0.144132521260515	0	F57F5.1 is an ortholog of human CTSB (cathepsin B); F57F5.1 is involved in embryo development, locomotion, nematode larval development and receptor-mediated endocytosis; F57F5.1 is predicted to have cysteine-type peptidase activity, based on protein domain information.
5054	F10D2.8	F10D2.8	7.52649001340935	2.2525	0.299276288945697	0	F10D2.8 is predicted to have transferase activity, transferring hexosyl groups, based on protein domain information.
8272	F48F7.3	F48F7.3	7.52293847484294	2.065	0.274493804104002	0	F48F7.3 is an ortholog of human B3GALT4 (UDP-Gal:betaGlcNAc beta 1,3-galactosyltransferase, polypeptide 4); F48F7.3 is predicted to have galactosyltransferase activity, based on protein domain information.
6820	F32H2.6	F32H2.6	7.51692829733262	1.3225	0.175936226566015	0	F32H2.6 is an ortholog of human FASN (fatty acid synthase); F32H2.6 is involved in embryo development, locomotion and nematode larval development; F32H2.6 is predicted to have catalytic activity, based on protein domain information.
15	ugt-1	AC3.7	7.51626107380607	1.365	0.181606251645114	0	ugt-1 is an ortholog of human UGT3A2 (UDP glycosyltransferase 3 family, polypeptide A2) and UGT3A1 (UDP glycosyltransferase 3 family, polypeptide A1); ugt-1 is involved in determination of adult lifespan; ugt-1 is predicted to have transferase activity, transferring hexosyl groups, based on protein domain information.
8878	F55B11.2	F55B11.2	7.50838787668019	0.95	0.12652516300477	0	F55B11.2 is involved in embryo development and oogenesis.
12620	T06A1.1	T06A1.1	7.50761330428234	2.64	0.351643044600359	0	None
717	tag-278	C02F12.7	7.50699172224965	1.9475	0.259424823158908	0	tag-278 is an ortholog of human FAM184A (family with sequence similarity 184, member A) and FAM184B (family with sequence similarity 184, member B); tag-278 is expressed in the body wall musculature.
12512	nhr-57	T05B4.2	7.49685302537529	0.8725	0.116382166896799	0	nhr-57 is involved in innate immune response and response to hypoxia; nhr-57 is predicted to have sequence-specific DNA binding activity, transcription factor activity, sequence-specific DNA binding, and zinc ion binding activity, based on protein domain information; nhr-57 is expressed in the pharynx, E lineage cell, all amphid neurons, intestine, excretory gland cell, excretory cell, vulva, pha…
6930	nlp-24	F35B12.7	7.49665628493244	1.0025	0.133726285679514	0	nlp-24 is involved in response to food; nlp-24 is expressed in the spermatheca, certain amphid neurons, all pharyngeal neurons, hypodermis, and the intestine.
13994	act-5	T25C8.2	7.49385519895021	0.855	0.11409347756276	0	act-5 encodes an ortholog of human cytoplasmic actin; act-5 is required for formation of the terminal web and microvilli on the apical surface of intestinal cells; act-5 also plays a role in mediating non-lytic exit of intracellular parasites from the intestine; act-5 is expressed only in intestinal cells and in the excretory cell; in the intestine, ACT-5 localizes to microvilli and the terminal …
9454	F59A6.12	F59A6.12	7.48673530380516	0.7875	0.105186034772693	0	None
13666	hsp-12.1	T22A3.2	7.46334689782654	2.9175	0.390910410562536	0	hsp-12.1 encodes a member of the small heat shock family of proteins.
17520	Y67D8C.12	Y67D8C.12	7.45197838009608	0.9225	0.123792629681261	0	probable non-coding RNA
4197	D1005.2	D1005.2	7.43540115453447	1.4475	0.194676786082651	0	D1005.2 is an ortholog of human UGP2 (UDP-glucose pyrophosphorylase 2); D1005.2 is predicted to have UTP:glucose-1-phosphate uridylyltransferase activity, based on protein domain information.
3324	acn-1	C42D8.5	7.42376970509897	1.4675	0.197675851796973	0	acn-1 encodes an ACE-like protein required for larval development and adult morphogenesis, and probably for cell fusion in larval seam cells; ACN-1 lacks not only the HExxH consensus metallopeptidase motif, but also other active site residues found in the sequence HEAI/VxD of mammalian and insect ACEs; acn-1 is expressed in hypodermal cells, vulval precursor cells, and ray papillae in the male ta…
333	B0348.2	B0348.2	7.41816256973878	1.6175	0.21804590891528	0	B0348.2 is an ortholog of human LITAF (lipopolysaccharide-induced TNF factor).
2884	C34D4.1	C34D4.1	7.41686757951753	1.6	0.215724493237357	0	C34D4.1 is an ortholog of human MAP9 (microtubule-associated protein 9); C34D4.1 is expressed in certain amphid neurons, hypodermis, certain sensory neurons, and the intestine.
1346	ser-7	C09B7.1	7.40430645431383	1.2375	0.167132466441745	0	ser-7 encodes an ortholog of mammalian 5-HT7 metabotropic serotonin receptors; SER-7 is required for stimulation of egg-laying or pharyngeal pumping by serotonin (5-HT), for regular pumping in response to bacteria, and probably also for 5-HT to activate MC neurons; SER-7 and SER-1 are redundantly required for normal egg-laying; SER-7 is expressed in head and tail neurons, pharyngeal neurons (M4, …
13284	T14E8.4	T14E8.4	7.39097634552266	1.6775	0.226965954371672	0	T14E8.4 is involved in lipid storage.
9973	ltd-1	K02C4.4	7.38887297350625	1.27	0.171880069471183	0	ltd-1 encodes a protein with LIM and transglutaminase domains; LTD-1 is homologous to the mouse KY protein (MGI:96709, mutated in kyphoscoliosis), and to the HILLARIN protein of Hirudo medicinalis, found at axon hillocks; ltd-1 is expressed in hypodermal cells from the twofold stage embryo to adulthood.
12380	T04A11.5	T04A11.5	7.38427932275184	1.2075	0.163523066669424	0	T04A11.5 is an ortholog of human PBLD (phenazine biosynthesis-like protein domain containing); T04A11.5 is predicted to have catalytic activity, based on protein domain information.
18224	ncx-3	ZC168.1	7.35304092280239	1.035	0.140758090545964	0	ncx-3 encodes a putative 3Na[+]/1Ca[2+] exchanger, orthologous to human SLC8A1-3 and paralogous to NCX-1/-2; NCX-3 is predicted to export free cytoplasmic Ca[2+] with low affinity but high capacity, being complemented by low-capacity/high-affinity Ca[2+] ATPase pumps such as MCA-1/-3; NCX-3 has tandem Calx-alpha and Calx-beta domains predicted to carry out ion transport and regulation; NCX-3 has …
9264	unc-24	F57H12.2	7.35246498411776	1.85	0.251616295214766	0	unc-24 encodes a protein that contains a stomatin-like domain and a lipid transfer domain; unc-24 activity is essential for normal locomotion and for wild-type sensitivity to lipid-soluble volatile anesthetics; unc-24 is genetically epistatic to unc-79 and to unc-1, which encodes an additional stomatin whose stability and localization to the nerve ring are dependent upon UNC-24; unc-24 is express…
2701	C32D5.12	C32D5.12	7.3520104563829	1.425	0.193824533908659	0	C32D5.12 is involved in body morphogenesis, embryo development, locomotion, nematode larval development and reproduction; C32D5.12 is predicted to have 3-beta-hydroxy-delta5-steroid dehydrogenase activity, based on protein domain information.
1199	C07E3.10	C07E3.10	7.34352973267077	2.235	0.304349554146511	0	None
16294	Y46E12A.3	Y46E12A.3	7.31565403743727	2.23	0.304825787084539	0	Y46E12A.3 is an ortholog of human GRXCR1 (glutaredoxin, cysteine rich 1); Y46E12A.3 is involved in determination of adult lifespan.
7681	fbxc-20	F42G2.3	7.31388827245094	2.045	0.279605036858829	0	fbxc-20 is expressed in the pharyngeal gland cell.
13970	T25B2.3	T25B2.3	7.30713548490182	2.2125	0.30278622923737	0	None
5261	skr-11	F13A7.9	7.30051080546444	1.18	0.161632525646941	0	The skr-11 gene encodes a homolog of Skp1 in S. cerevisiae that has no known function in vivo, since skr-11(RNAi) animals are at least superficially normal.
15019	ech-7	Y105E8A.4	7.28275826825546	0.865	0.118773679990233	0	ech-7 is an ortholog of human ECHS1 (enoyl CoA hydratase, short chain, 1, mitochondrial); ech-7 is predicted to have catalytic activity, based on protein domain information.
4371	D2045.9	D2045.9	7.27704578150253	0.8725	0.119897555436274	0	D2045.9 is an ortholog of human COLGALT2 (collagen beta(1-O)galactosyltransferase 2), COLGALT1 (collagen beta(1-O)galactosyltransferase 1) and CERCAM (cerebral endothelial cell adhesion molecule); D2045.9 is involved in hermaphrodite genitalia development, locomotion and reproduction; D2045.9 is expressed in the mu_int_R, mu_int_L, anal depressor muscle, reproductive system, anal sphincter muscle…
6638	F30H5.3	F30H5.3	7.2752914589638	2.9965	0.411873533438726	0	F30H5.3 is an ortholog of human AMBP (alpha-1-microglobulin/bikunin precursor), LRP11 (low density lipoprotein receptor-related protein 11) and members of the WFDC (WAP four-disulfide core domain containing) family including WFIKKN1; F30H5.3 is predicted to have serine-type endopeptidase inhibitor activity, based on protein domain information.
13463	T19D12.4	T19D12.4	7.26957320695806	1.3725	0.188800629820512	0	T19D12.4 is an ortholog of human VIT (vitrin), MATN1 (matrilin 1, cartilage matrix protein), COCH (cochlin), MATN2 (matrilin 2), VWA2 (von Willebrand factor A domain containing 2), MATN3 (matrilin 3) and MATN4 (matrilin 4) and members of the Fibronectin type III domain containing family including VWA1 and COL (Collagens) family including COL6A5; T19D12.4 is involved in defense response to Gram-ne…
14001	T25D10.4	T25D10.4	7.26807587128038	1.2725	0.175080725977043	0	Uncharacterized protein T25D10.4
5658	col-116	F17E9.1	7.2606360008564	1.1725	0.161487230576179	0	col-116 is an ortholog of human SFTPD (surfactant protein D); col-116 is a structural constituent of cuticle, based on protein domain information.
4644	cyp-13B1	F02C12.5	7.25992129402972	2.16	0.297523886626195	0	cyp-13B1 encodes one of ~80 C. elegans cytochrome P450s: membrane-associated, heme-containing NADPH-dependent monooxygenases that catalyze the oxidative metabolism of a variety of exogenous compounds and endogenous substrates.
11996	R13D11.10	R13D11.10	7.25780158324232	0.925	0.127449061453506	0	None
646	acs-7	C01G6.7	7.2532948599108	1.06	0.146140481046573	0	acs-7 is predicted to have catalytic activity, based on protein domain information.
15114	ift-20	Y110A7A.20	7.23576049734728	1.9975	0.276059441261538	0	Y110A7A.20 encodes an ortholog of Chlamydomonas and human IFT20; Y110A7A.20 undergoes intraflagellar transport (IFT) in a manner consistent with its being a component of the OSM-3-driven IFT-particle B subcomplex; Y110A7A.20 is expressed in amphid and phasmid neurons, mechanosensory neurons, and other unidentified head neurons and tail cells; by orthology with human IFT20, Y110A7A.20 may deliver …
5663	F17E9.2	F17E9.2	7.22723070784224	1.69	0.233837837522772	0	None
6437	F27E5.7	F27E5.7	7.22303694161288	1.64	0.227051310031621	0	None
8346	F49E12.1	F49E12.1	7.20986702222132	1.095	0.151875200558503	0	skpo-1 is involved in body morphogenesis, defense response and determination of adult lifespan; skpo-1 is predicted to have heme binding activity and peroxidase activity, based on protein domain information.
173	trx-1	B0228.5	7.19705990977978	0.95	0.131998345422842	0	trx-1 encodes a thioredoxin, a small redox protein that functions as a protein-disulfide reductase; loss of trx-1 activity via a deletion mutation and RNAi indicates that trx-1 is required for normal adult lifespan; in vitro, TRX-1 is capable of reducing protein disulfide bonds in the presence of a mammalian thioredoxin reductase; a TRX-1::GFP fusion protein is expressed in the ASJL/R amphid chem…
2820	C33G8.2	C33G8.2	7.17836138648951	2.395	0.333641603013699	0	C33G8.2 is involved in embryo development and mitotic nuclear division.
3393	pmp-1	C44B7.8	7.16979471991107	0.635	0.0885659945376897	0	pmp-1 encodes an ATP-binding cassette (ABC) transporter most closely related to the peroxisomal membrane proteins; pmp-1 activity is required for efficient RNA interference (RNAi) of a germline-expressed target, pop-1.
6814	F32H2.11	F32H2.11	7.16846660317182	1.96	0.273419701660152	0	None
18912	ZK550.6	ZK550.6	7.16758933933604	1.24	0.173000982798335	0	The ZK550.6 gene encodes an ortholog of the human gene PHYTANOYL-COA HYDROXYLASE (PHYH; PAHX; OMIM:602026), which when mutated leads to Refsum disease (OMIM:266500).
3700	snf-9	C49C3.1	7.1657152068528	0.985	0.137460109921479	0	snf-9 is an ortholog of human SLC6A7 (solute carrier family 6 (neurotransmitter transporter), member 7) and SLC6A5 (solute carrier family 6 (neurotransmitter transporter), member 5); snf-9 is predicted to have neurotransmitter:sodium symporter activity, based on protein domain information.
1700	C14F11.2	C14F11.2	7.15876988518689	1.0325	0.14422868964352	0	lrch-1 is an ortholog of human LRCH1 (leucine-rich repeats and calponin y (CH) domain containing 1), LRCH4 (leucine-rich repeats and calponin y (CH) domain containing 4), LRCH2 (leucine-rich repeats and calponin y (CH) domain containing 2) and LRCH3 (leucine-rich repeats and calponin y (CH) domain containing 3).
5080	mig-10	F10E9.6	7.15136749381098	0.98	0.137036727709508	0	mig-10 encodes proteins that contain, from N- to C-terminus, an RA-like (Ras association) domain, a PH (pleckstrin homology) domain, and a proline-rich motif, and that are homologous to the vertebrate RIAM, lamellopodin, and Grb7, Grb10, and Grb14 cytoplasmic adaptor proteins; during development, mig-10 activity is required for cell migration and for outgrowth of axons and excretory cell canals; …
2139	C24A8.5	C24A8.5	7.14547047592455	1.03225	0.144462146121517	0	None
10615	pxn-2	K09C8.5	7.12620258117887	1.345	0.188740073647682	0	pxn-2 encodes a member of the peroxidasin family of extracellular peroxidases containing several LLRs, two of four Ig domains and a heme peroxidase catalytic domain, PXN-2 is closely related to human PXDN and PXDNL (OMIM: 605158); PXN-2 function becomes critical soon after the twofold stage of epidermal elongation in embryos; pxn-2 mutants display defects in late stages of epidermal elongation, i…
13650	T21F4.1	T21F4.1	7.11585920650922	0.8025	0.112776261686841	0	T21F4.1 is orthologous to the human gene Arginase Type I Erythroid Variant (ARG1), which contributes most of the arginase activity in the liver.
5285	hbl-1	F13D11.2	7.1142680275632	1.405	0.197490450817502	0	hbl-1 encodes a C2H2-type zinc finger transcription factor related to Drosophila hunchback; hbl-1 is a heterochronic gene that plays an essential role in regulating developmental timing during postembryonic development; accordingly, mutations in hbl-1 affect locomotion, egg laying, body morphology, and hypodermal differentiation; hbl-1 is expressed in hypodermal precursor cells, neuronal precurso…
8874	rncs-1	F55A4.9	7.10099451526767	0.8875	0.124982493380583	0	rncs-1 is expressed in the hyp12, hyp11, hyp10, hyp9, hyp8, hyp6, hyp5, hyp4, hyp3, hyp2, hyp1, hyp7 syncytium, and the vulva.
4023	C54D10.13	C54D10.13	7.1006682270696	0.755	0.106328020949034	0	None
2826	nhr-140	C33G8.9	7.09303678358088	0.905	0.127589920595776	0	nhr-140 is involved in lipid storage and reproduction; nhr-140 is predicted to have sequence-specific DNA binding activity, transcription factor activity, sequence-specific DNA binding, and zinc ion binding activity, based on protein domain information.
2964	C35B1.4	C35B1.4	7.09213751695236	0.995	0.140296207965744	0	None
5572	F16C3.2	F16C3.2	7.09181995214068	0.985	0.138892415014382	0	None
13756	pgrn-1	T22H2.6	7.09140682645717	0.595	0.0839043668712008	0	pgrn-1 encodes an ortholog of human progranulin with three predicted granulin domains; pgrn-1 regulates the clearance of apoptotic cells, as loss of pgrn-1 results in an increased rate of apoptotic cell clearance; genetic studies indicate that the pgrn-1 activity requires the normal functioning of existing cell engulfment pathways; pgrn-1 is a secreted protein found in intestinal organelles, in t…
11955	R12E2.15	R12E2.15	7.08781233391613	2.41	0.340020289260175	0	None
10792	cpt-4	K11D12.4	7.06045742349349	1.6325	0.231217313848236	0	cpt-4 is an ortholog of human CPT1C (carnitine palmitoyltransferase 1C) and CPT1A (carnitine palmitoyltransferase 1A (liver)); cpt-4 is predicted to have transferase activity, transferring acyl groups, based on protein domain information.
10773	K10H10.4	K10H10.4	7.04997442679024	2.61	0.370214108874193	0	None
17327	ttr-17	Y5F2A.2	7.04131496356246	1.875	0.266285489244948	0	None
4556	EEED8.15	EEED8.15	7.03471511386049	1.235	0.175557926655293	0	None
5517	pud-2.2	F15E11.14	7.03391775305128	1.4075	0.200101856378607	0	pud-2.2, along with pud-2.1, encodes a 17.4 kDa protein (CE16999) with unknown function that is seven-fold more abundant in glp-1 mutant hermaphrodites (which lack a germline) than in normal hermaphrodites; in addition, the protein products of PUD-2.2/PUD-2.1 are more abundant in daf-2 mutant vs. wild-type adults during a temperature shift from 15 to 25 degrees C; pud-2.2(RNAi) animals have no ob…
6793	F32D8.7	F32D8.7	7.03384365893045	3.02	0.429352733219438	0	F32D8.7 is an ortholog of human WFDC8 (WAP four-disulfide core domain 8), SPINT2 (serine peptidase inhibitor, Kunitz type, 2) and TFPI (tissue factor pathway inhibitor (lipoprotein-associated coagulation inhibitor)); F32D8.7 is predicted to have serine-type endopeptidase inhibitor activity, based on protein domain information.
4287	cpn-2	D1069.2	7.02562706904299	2.2775	0.324170352001083	0	cpn-2 encodes a calponin homolog, more similar to the calponin paralogs transgelin (SM22 alpha) or neuronal protein NP25 than to calponin per se.
15120	Y110A7A.7	Y110A7A.7	7.02526941245233	0.665	0.0946582915128186	0	Y110A7A.7 is involved in reproduction and secretion by cell.
5701	F18C5.9	F18C5.9	7.00823801076152	2.685	0.383120549826796	0	F18C5.9 is an ortholog of human FAM46C (family with sequence similarity 46, member C), FAM46D (family with sequence similarity 46, member D), FAM46B (family with sequence similarity 46, member B) and FAM46A (family with sequence similarity 46, member A).
2722	C32E8.6	C32E8.6	7.0048099199411	1.06	0.151324591547077	0	C32E8.6 is predicted to have catalytic activity, based on protein domain information.
13943	T24E12.13	T24E12.13	6.98979249330949	1.31075	0.187523449552276	0	None
9295	lys-5	F58B3.2	6.9841551632514	1.2775	0.182914034717017	0	lys-5 is involved in defense response to Gram-positive bacterium; lys-5 is predicted to have lysozyme activity, based on protein domain information.
10352	K07C11.4	K07C11.4	6.98012962217635	0.8425	0.120699764274193	0	K07C11.4 is an ortholog of human CEL (carboxyl ester lipase) and members of the CES (Carboxylesterases) family including CES3; K07C11.4 is expressed in the pharynx, gonad, and the intestine.
13724	igdb-3	T22E5.3	6.97775246588963	1.1825	0.169467175251714	0	None
2097	C23G10.5	C23G10.5	6.9757795064272	0.8625	0.123642096084793	0	None
9605	H03E18.1	H03E18.1	6.97339652939697	2.1025	0.301503003756738	0	None
5497	dys-1	F15D3.1	6.97275127340274	0.8175	0.117242099702928	0	The dys-1 gene encodes an ortholog of human DMD, which when mutated leads to Duchenne muscular dystrophy (OMIM:310200).
16719	grdn-1	Y51A2D.15	6.97012737704301	0.705	0.101145927737563	0	grdn-1 is an ortholog of human CCDC88B (coiled-coil domain containing 88B), CCDC88A (coiled-coil domain containing 88A) and CCDC88C (coiled-coil domain containing 88C); grdn-1 is involved in body morphogenesis, hermaphrodite genitalia development, locomotion, oviposition and receptor-mediated endocytosis.
5316	sdz-13	F13E9.6	6.9636670156956	1.3575	0.194940395188382	0	None
8533	F53A9.2	F53A9.2	6.96276398342535	0.77	0.110588266647119	0	F53A9.2 encodes a novel protein containing polyhistidine stretches; F53A9.2 activity is required for the stress response to copper ion, and in that pathway, is a downstream target of the FOS-1 transcription factor that binds directly to the F53A9.2 promoter; an F53A9.2 promoter fusion is weakly expressed in the intestine, but expression is upregulated in the intestine following exposure to copper…
6220	F25F8.1	F25F8.1	6.95861646075896	1.2275	0.176400008093867	0	None
6573	pqn-32	F29C12.1	6.94568232519622	2.5425	0.366054748973589	0	The protein product of this gene is predicted to contain a glutamine/asparagine (Q/N)-rich ('prion') domain, by the algorithm of Michelitsch and Weissman (as of the WS77 release of WormBase, i.e., in wormpep77).
7566	tag-196	F41E6.6	6.94159674472306	1.3225	0.190518125531471	0	tag-196 is an ortholog of human CTSF (cathepsin F); tag-196 is predicted to have cysteine-type endopeptidase inhibitor activity and cysteine-type peptidase activity, based on protein domain information; tag-196 is expressed in the pharynx, nervous system, tail, reproductive system, intestine, and the body wall musculature.
13409	nhr-44	T19A5.4	6.93900689265633	1.515	0.218330954765782	0	nhr-44 is involved in reproduction; nhr-44 is predicted to have sequence-specific DNA binding activity, transcription factor activity, sequence-specific DNA binding, and zinc ion binding activity, based on protein domain information; nhr-44 is expressed in the pharynx, all sensory neurons, intestine, head neurons, tail neurons, head muscle, and the ciliated neurons.
13118	aat-6	T11F9.4	6.93706377687768	1.0975	0.158208146169585	0	aat-6 encodes a predicted amino acid transporter catalytic subunit; unlike catalytic subunits in other organisms, however, AAT-6 does not contain the highly conserved cysteine residue known to facilitate covalent interaction with a glycoprotein subunit, suggesting that AAT-6 does not require this residue for heterodimer formation or alternatively, does not require the glycoprotein subunit for fun…
12496	T05A8.3	T05A8.3	6.93692346141685	1.0825	0.156049004435592	0	None
7771	F43G6.4	F43G6.4	6.93409114222801	0.8325	0.12005899301354	0	F43G6.4 is an ortholog of human HDAC10 (histone deacetylase 10).
11444	R05D3.9	R05D3.9	6.92985805402837	0.635	0.0916324685223343	0	R05D3.9 is an ortholog of human PDIA3 (protein disulfide isomerase family A, member 3).
2188	C24H11.2	C24H11.2	6.92026820880356	1.125	0.162565953523137	0	C24H11.2 is an ortholog of human PPP1CB (protein phosphatase 1, catalytic subunit, beta isozyme); C24H11.2 is involved in receptor-mediated endocytosis and reproduction; C24H11.2 is predicted to have hydrolase activity, based on protein domain information.
2688	fbxc-15	C32B5.4	6.91423541278638	1.8625	0.269371794393305	0	None
16557	Y48G1C.6	Y48G1C.6	6.91315128128958	0.7525	0.108850503826907	0	Y48G1C.6 is an ortholog of members of the human Helix-turn-helix CENPB type domain containing family including CENPB; Y48G1C.6 is predicted to have DNA binding activity, based on protein domain information.
746	C03A3.1	C03A3.1	6.90767412411	1.1875	0.171910252085466	0	None
10118	ttr-3	K03H1.3	6.90521621679547	1.4925	0.216140951005967	0	K03H1.3 encodes a protein containing a predicted signal sequence followed by a transthyretin-like domain; the product of K03H1.3 belongs to a family of apparently nematode-specific proteins whose function is not yet known.
14162	T27C5.9	T27C5.9	6.89984701779348	1.32	0.191308589392773	0	None
16083	osm-5	Y41G9A.1	6.89764363245272	2.075	0.300827370993383	0	osm-5 encodes the ortholog of the murine polycystic kidney disease gene Tg737 (which encodes the protein Polaris) and human IFT88; osm-5 is required for the proper morphology of the cilia of chemosensory neurons and is involved in intraflagellar transport; the abnormalities in cilia structure in osm-5 mutants lead to defects in several processes like osmotic avoidance, chemotaxis, dauer formation…
2981	C35C5.9	C35C5.9	6.89538630700707	0.8025	0.116382166896799	0	None
12539	T05C3.6	T05C3.6	6.88513901007149	0.8025	0.116555380919124	0	The T05C3.6 gene encodes a paralog of T05C3.2, a protein with NACHT and WD domains that may be involved in apoptosis.
15934	epg-2	Y39G10AR.10	6.87583400237196	2.5125	0.36541021774715	0	epg-2 is involved in embryo development, growth, macroautophagy, mitotic spindle organization, nematode larval development, protein catabolic process and receptor-mediated endocytosis; epg-2 is localized to the cytoplasm.
7082	ttr-20	F36A4.8	6.87198955400659	1.31	0.190628927722428	0	None
11391	nhr-205	R04B5.3	6.87019866586056	1.0675	0.155381241783389	0	nhr-205 is predicted to have sequence-specific DNA binding activity, transcription factor activity, sequence-specific DNA binding, and zinc ion binding activity, based on protein domain information.
6742	eva-1	F32A7.3	6.86810874518962	1.0375	0.151060508575473	0	eva-1 encodes, by alternative splicing, two isoforms of a cell-surface protein that acts cell-autonomously with SAX-3 as a SLT-1 receptor subunit, and is required for guidance of the AVM pioneer axon to the ventral nerve cord; EVA-1's long isoform is predicted to have a signal sequence, an ectodomain with two lectinlike galactose-binding sequences, a single transmembrane sequence, and a cytodomai…
2752	C33A12.19	C33A12.19	6.86321913480382	1.5925	0.232033972501961	0	None
17354	Y60A3A.27	Y60A3A.27	6.86141575736408	1.5075	0.219706843792706	0	None
10162	pept-1	K04E7.2	6.85847950226847	1.2575	0.183349676788285	0	pept-1 encodes a low affinity/high capacity oligopeptide transporter; pept-1 is required for uptake of intact peptides from the intestine and thus for normal development, growth, and reproduction; genetic studies indicate that pept-1 interacts with both the daf-2/insulin- and let-363/TOR-signaling pathways to regulate lifespan and with the daf-2 pathway to influence stress response; PEPT-1 is exp…
10184	irk-3	K04G11.5	6.85604719569288	1.2025	0.175392608259091	0	irk-3 is an ortholog of members of the human Potassium channels, inwardly rectifying sub J family including KCNJ12; irk-3 is predicted to have inward rectifier potassium channel activity, based on protein domain information.
9904	K01D12.1	K01D12.1	6.85206164259803	3.5	0.510795171228631	0	None
13823	T23F1.5	T23F1.5	6.84440036134181	3.005	0.439045035555297	0	None
8543	F53B1.4	F53B1.4	6.8433322152208	2.8475	0.41609846058133	0	F53B1.4 is an ortholog of human TGDS (TDP-glucose 4,6-dehydratase); F53B1.4 is involved in endoplasmic reticulum unfolded protein response; F53B1.4 is predicted to have coenzyme binding activity and dTDP-glucose 4,6-dehydratase activity, based on protein domain information.
2553	C29H12.6	C29H12.6	6.84051132013599	1.3675	0.199911956285281	0	C29H12.6 is involved in lipid storage; C29H12.6 is expressed in the marginal cell.
14380	W01F3.2	W01F3.2	6.8125358306823	1.3675	0.200732889189522	0	W01F3.2 is an ortholog of human HPX (hemopexin) and members of the MMP (Matrix metallopeptidases) family including MMP19.
15925	zig-8	Y39E4B.8	6.81133815695954	1.5125	0.222056219372194	0	zig-8 encodes a predicted secreted protein that is a member of the immunoglobulin superfamily of proteins; a zig-8::gfp reporter fusion is expressed in the PVT neuron and in pharyngeal muscle.
18667	ZK154.1	ZK154.1	6.80346387848657	3.14	0.461529605518901	0	None
8949	ptr-10	F55F8.1	6.80252704284092	0.9225	0.13561136827392	0	ptr-10 encodes an ortholog of Drosophila and human PTCHD3, which defines one of seven paralogous families of sterol sensing domain (SSD) proteins; PTR-10 is weakly required for normal molting from L4 to adult stages; however, PTR-10 in conjunction with PTR-1 and PTR-6 is strongly required for both molting and viability, with triple ptr-1/-6/-10 RNAi animals showing pronounced molting defects and …
2358	syg-2	C26G2.1	6.80244775461811	1.6625	0.244397319901699	0	syg-2 encodes a transmembrane protein that is a member of the immunoglobulin superfamily of proteins; during larval development, SYG-2 activity is required in vulval epithelial cells for proper synaptic specificity of the HSNL neuron; in regulating synapse formation, SYG-2 acts as a guidepost protein for the SYG-1 receptor that interacts with SYG-2 and acts within HSNL to regulate synaptic specif…
4271	D1054.10	D1054.10	6.80196126926962	0.79	0.116142972405491	0	None
16184	dyf-19	Y43F8C.4	6.80148618928424	2.365	0.347718121331491	0	dyf-19 encodes the C. elegans ortholog of mammalian transition fibre protein FBF1 (Fas (TNFRSF6)-binding factor 1); DYF-19 is required for actively regulating transit of assembled intraflagellar transport (IFT) particles through the ciliary base, and thus for proper ciliogenesis; DYF-19 physically interacts with DYF-11, a component of the IFT-B subcomplex orthologous to mammalian IFT54; DYF-19 lo…
9294	lys-4	F58B3.1	6.79802502137911	1.225	0.180199395581437	0	lys-4 is predicted to have lysozyme activity, based on protein domain information.
3461	C45B11.6	C45B11.6	6.7963567141572	0.69	0.101524983019607	0	C45B11.6 is an ortholog of human EPHX1 (epoxide hydrolase 1, microsomal (xenobiotic)); C45B11.6 is predicted to have cis-stilbene-oxide hydrolase activity, based on protein domain information.
12829	spp-2	T08A9.12	6.79528033422486	0.52	0.07652370092533	0	spp-2 encodes an antimicrobial peptide that belongs to the SPP-protein family, called caenopores, with structural similarity to saposin-like proteins (SAPLIPs), the amoebapores and the mammalian NK-lysin and granulysin; caenopores are part of the worm's innate immune system and interact with and eliminate bacteria via membrane pore-forming activity; C. elegans has at least 33 putative SPP protein…
9314	gadr-1	F58D2.1	6.78358753038582	1.4	0.206380472534475	0	gadr-1 is an ortholog of human FBXL16 (F-box and leucine-rich repeat protein 16); gadr-1 is expressed widely.
10086	kal-1	K03D10.1	6.78109392637091	1.4025	0.206825036672304	0	kal-1 encodes a cell surface protein that contains a WAP-type protease inhibitor domain and Type III fibronectin domains and is the C. elegans ortholog of human KAL-1, mutated in the X-linked form of the neurological disorder Kallmann syndrome; in C. elegans, both kal-1 loss-of-function mutations and kal-1 overexpression result in similar phenotypes that indicate KAL-1 activity is required for ep…
7779	ces-1	F43G9.11	6.7809584216264	1.175	0.173279340019634	0	ces-1 encodes a C2H2-type zinc finger transcription factor that is a member of the Snail family of proteins that includes Drosophila Scratch, Snail, and Slug, and human SNAIL and SLUG; during development, CES-1 functions as a transcriptional repressor that blocks programmed cell death in specific neurons by inhibiting expression of the cell-death activator EGL-1; in addition, CES-1 functions to r…
10321	K07A1.6	K07A1.6	6.77450745705803	0.7825	0.115506552315438	0	K07A1.6 encodes a putative secreted TIL-domain protease inhibitor paralogous to SWM-1, ISL-1, and the products of 11 other C. elegans genes; K07A1.6 and its relatives are collectively similar to other TIL-domain protease inhibitors from nematodes, insects, and vertebrates; K07A1.6 has no obvious function in mass RNAi assays.
2941	odd-2	C34H3.2	6.76378601897125	0.945	0.139714650544745	0	odd-2 encodes a protein with homology to the Drosophila ODD-SKIPPED family members and affects larval viability; expressed in the intestine.
6097	daf-10	F23B2.4	6.76367715770018	2.204	0.325858249678702	0	daf-10 encodes a WD- and WAA-repeat containing protein that is the C. elegans ortholog of intraflagellar transport (IFT) complex A component IFT122; daf-10 activity is required for intraflagellar transport and thus for proper development of amphid and phasmid neurons, dauer development, chemotaxis, and normal lifespan; a DAF-10::GFP fusion protein undergoes both anterograde and retrograde intrafl…
17196	tag-273	Y57G11A.1	6.76223384993673	1.64	0.242523408150895	0	tag-273 encodes a LIM-type zinc finger domain-containing protein with similarity to human LIM domain and actin-binding protein 1 (HGNC:LIMA1); RNAi experiments indicate that TAG-273 is required for normal reproduction; about 3% to 10% of tag-273 transcripts are RNA edited to change A to G resulting in a change to residue 688 from an N to a S.
11168	his-24	M163.3	6.76063812381667	2.335	0.345381598191768	0	his-24 encodes one of eight C. elegans H1 linker histones; HIS-24, along with the histone deacetylase SIR-2.1 and the Enhancer of zeste E(Z) ortholog MES-2, plays a key role in heterochromatin regulation and thus, in regulation of fertility and embryonic development; specifically, HIS-24 and SIR-2.1 are essential for maintenance of the histone H3K27me3 mark at subtelomeric regions in the C. elega…
9988	K02E10.1	K02E10.1	6.75765071591582	0.965	0.142801106563144	0	K02E10.1 is an ortholog of human RAB4B-EGLN2 (RAB4B-EGLN2 readthrough (NMD candidate)) and members of the RAB, member RAS oncogene GTPases family including RAB4A; K02E10.1 is predicted to have GTP binding activity and GTPase activity, based on protein domain information.
13011	cyp-13A2	T10B9.7	6.75601346699024	1.19	0.176139376544218	0	cyp-13A2 encodes one of ~80 C. elegans cytochrome P450s: membrane-associated, heme-containing NADPH-dependent monooxygenases that catalyze the oxidative metabolism of a variety of exogenous compounds and endogenous substrates.
6717	sssh-1	F31F6.8	6.74620151805228	1.47055555555556	0.217982749495471	0	None
8499	F52G3.5	F52G3.5	6.74208781692634	1.265	0.187627339534818	0	None
6644	F31A9.2	F31A9.2	6.74155526227594	0.7775	0.115329470686193	0	F31A9.2 is involved in embryo development.
6696	F31E9.6	F31E9.6	6.73959193401203	0.5575	0.0827201417323978	0	None
15295	nhr-91	Y15E3A.1	6.73070180050304	1.365	0.20280203171354	0	nhr-91 encodes a conserved nuclear receptor that is orthologous to members of the NR6 subfamily of nuclear receptors that includes Drosophila HR4 and human germ cell nuclear factor (GCNF, OMIM:600281, human and mouse GCNF are expressed primarily in the testis); by homology, NHR-91 is predicted to function as a transcription factor that may activate or repress transcription in response to a hormon…
8267	srd-70	F48F5.4	6.72069773404682	0.7925	0.11791930412005	0	7TM GPCR, serpentine receptor class d (Srd)
10631	rig-1	K09E2.4	6.71096243604348	1.165	0.173596561015299	0	rig-1 is an ortholog of human BOC (BOC cell adhesion associated, oncogene regulated) and TMIGD1 (transmembrane and immunoglobulin domain containing 1); rig-1 is involved in embryo development and reproduction; rig-1 is expressed in the AMsoR, AMsoL, lateral ganglion, certain interneurons, all pharyngeal neurons, pharyngeal muscle cell, hypodermis, and certain head motor neurons.
8751	F54D11.3	F54D11.3	6.69217949334945	0.95	0.141956742335451	0	None
18595	ZK1240.3	ZK1240.3	6.68939596115441	0.6975	0.104269504160078	0	ZK1240.3 is an ortholog of human RFPL3 (ret finger protein-like 3), RFPL4AL1 (ret finger protein-like 4A-like 1) and TRIML2 (tripartite motif family-like 2) and members of the TRIM (Tripartite motif-containing) family including TRIM38 and RNF (Ring finger proteins) family including TRIML1; ZK1240.3 is predicted to have zinc ion binding activity, based on protein domain information.
6525	zag-1	F28F9.1	6.68348045282595	1.0775	0.161218396254066	0	zag-1 encodes a homeodomain protein of the ZFH class which consists of a homeodomain flanked by two clusters of C2H2-type zinc fingers and is related to transcriptional repressors encoded by Drosophila zfh-1 and the vertebrate ZEB genes; ZAG-1 is required for locomotion, for neuronal differentiation, and for proper axonal branching and fasciculation; from late embryogenesis through adult stages o…
1463	C10B5.3	C10B5.3	6.6667972570446	1.6125	0.241870262110659	0	None
2945	col-107	C34H4.4	6.66404237692125	2.545	0.38190033256898	0	col-107 is an ortholog of human SFTPD (surfactant protein D); col-107 is a structural constituent of cuticle, based on protein domain information.
5404	acp-2	F14E5.4	6.65556516326423	0.99175	0.149010636312904	0	acp-2 is an ortholog of human ACPT (acid phosphatase, testicular), ACPP (acid phosphatase, prostate) and ACP2 (acid phosphatase 2, lysosomal); acp-2 is predicted to have acid phosphatase activity, based on protein domain information; acp-2 is expressed in the spermatheca, nervous system, and the intestine.
18467	lfi-1	ZC8.4	6.65233122445625	0.6475	0.097334299533909	0	lfi-1 encodes, by alternative splicing, at least four isoforms of a large coiled-coil protein paralogous to F35D11.11, and possibly orthologous to rootletin (the structural protein comprising ciliary rootlets); LFI-1 is also homologous to the Parascaris univalens Mitotic Antigen, PUMA1; LFI-1 was initially identified in yeast two-hybrid screens for proteins that interact with the coiled-coil prot…
9937	K02A11.3	K02A11.3	6.65014944425743	0.7225	0.108644175000292	0	K02A11.3 is an ortholog of human ENDOU (endonuclease, polyU-specific); K02A11.3 is predicted to have hydrolase activity, acting on ester bonds, based on protein domain information.
1118	C06E4.8	C06E4.8	6.63115668886069	1.085	0.163621529532341	0	None
2261	dpyd-1	C25F6.3	6.62899156732222	1.1925	0.17989161517092	0	dpyd-1 encodes the C. elegans ortholog of human DihydroPYrimidine Dehydrogenase (DPYD), which when mutated leads to thymine-uraciluria (OMIM:274270); DPYD-1 is the first and rate-limiting enzyme for uracil and thymine metabolism to 5,6-dihydrouracil and 5,6-dihydrothymine, respectively, and in humans, functions in metabolism of the anti-cancer pyrimidine antagonist 5-fluorouracil (5-FU); in C. el…
3834	magu-3	C50F2.8	6.62858159481025	1.5775	0.237984548796243	0	magu-3 is an ortholog of human MPP6 (membrane protein, palmitoylated 6 (MAGUK p55 subfamily member 6)) and MPP2 (membrane protein, palmitoylated 2 (MAGUK p55 subfamily member 2)); magu-3 is expressed in the pharynx, tail, and the intestine.
8848	bus-18	F55A11.5	6.6271923313731	1.165	0.175790884245942	0	bus-18 encodes a lysocardiolipin acyltransferase; bus-18 is required for colonization by Microbacterium nematophilum and the tail-swelling response to M. nematophilum infection, as well as for cuticle integrity, traction during movement, full body size, normally rapid growth, and vulval morphogenesis; bus-18 is also needed for normal cuticle antigens and resistance to emetine or colchicine, perha…
474	valv-1	B0496.7	6.61862308373793	2.395	0.361857741360821	0	valv-1 encodes one of two C. elegans small LIM domain-containing proteins related to the mammalian CRIP (Cysteine-Rich Intestinal Protein) family of proteins; in C. elegans, valv-1 activity is required for normal functioning of the valves connecting the pharynx to the intestine, the intestine to the rectum, and the uterus to the spermatheca; a valv-1::gfp promoter fusion is expressed in the phary…
16383	Y47D3B.12	Y47D3B.12	6.60106982846139	1.74	0.263593636367511	0	None
13357	grl-2	T16G1.8	6.59787481941526	1.37	0.207642617887894	0	grl-2 encodes a hedgehog-like protein, with an N-terminal signal sequence, a central proline-rich low-complexity region, and a C-terminal Ground-like (Grl) domain; GRL-2 is expressed in neurons, amphid socket cells, and other cells; the Grl domain is predicted to form a cysteine-crosslinked protein involved in intercellular signalling, and it has subtle similarity to the N-terminal Hedge domain o…
7775	F43G6.8	F43G6.8	6.59593238986382	0.865	0.131141429122177	0	F43G6.8 is an ortholog of human RNF224 (ring finger protein 224) and RNF182 (ring finger protein 182); F43G6.8 is predicted to have zinc ion binding activity, based on protein domain information.
3014	C35E7.4	C35E7.4	6.58303055369178	1.8075	0.274569589987145	0	C35E7.4 is expressed in the intestine, vulval muscle, head neurons, and the tail neurons.
4833	tth-1	F08F1.8	6.58271303803718	0.9325	0.141658917016691	0	tth-1 encodes a thymosin beta ortholog that contains four functionally distinct thymosin beta repeats; in vitro, TTH-1 binds multiple actin monomers as well as filamentous actin suggesting that, as its homology predicts, TTH-1 plays a direct role in regulating actin polymerization and cytoskeletal organization in C. elegans; consistent with this, loss of tth-1 activity via a deletion mutation tha…
998	C05D9.3	C05D9.3	6.57928529170098	1.33	0.202149616718649	0	C05D9.3 is involved in striated muscle myosin thick filament assembly; C05D9.3 is localized to the plasma membrane.
9411	F58H1.5	F58H1.5	6.57865165448858	0.935	0.142126388370488	0	None
18022	cyp-42A1	Y80D3A.5	6.57255575636993	1.4375	0.218712484653602	0	cyp-42A1 is an ortholog of human CYP4V2 (cytochrome P450 4V2); cyp-42A1 is involved in body morphogenesis, determination of adult lifespan, embryo development, locomotion, nematode larval development, positive regulation of growth and reproduction; cyp-42A1 is predicted to have heme binding activity, iron ion binding activity, and oxidoreductase activity, acting on paired donors, with incorporati…
17399	Y62F5A.9	Y62F5A.9	6.56181940793204	1.995	0.304031530887365	0	Y62F5A.9 is expressed in the pharyngeal gland cell.
7684	ceh-86	F42G2.6	6.56147196039544	0.9925	0.151261790950362	0	ceh-86 encodes a homeodomain-containing protein; ceh-86(RNAi) performed in the background of C. elegans retinoblastoma pathway mutants results in a number of phenotypes that suggest ceh-86 plays a role in the normal development and/or survival of the animal; a ceh-86::gfp promoter fusion is expressed in the adult intestine.
1248	nrf-6	C08B11.4	6.55789000807897	0.72	0.109791411431573	0	nrf-6 encodes a protein with 12 predicted transmembrane domains that is highly similar to NDG-4 and affects embryonic viability, yolk transport, locomotion, body morphology, and affects sensitivity to fluoxetine with respect to nose-contraction response in a common pathway with ndg-4 and nrf-5; expressed in the most anterior cells of the hypodermis and in the intestine and is required in the inte…
7446	tba-9	F40F4.5	6.54988669279057	1.13	0.172522068396051	0	tba-9 encodes one of nine C. elegans alpha tubulins; by homology, TBA-9 is predicted to be a component of microtubules; as loss of tba-9 function via RNA-mediated interference (RNAi) does not result in any obvious abnormalities, TBA-9 likely functions redundantly with other alpha tubulins as a basic component of cellular architecture that may play additional roles in processes such as cell divisi…
7608	F41G4.8	F41G4.8	6.54416133041959	0.9725	0.14860574959842	0	None
6199	ifd-2	F25E2.4	6.53305625407683	0.9	0.137760944494909	0	ifd-2 encodes a nonessential intermediate filament protein; IFD-2 is predicted to function as a structural component of the cytoskeleton; IFD-2 has no obvious function in RNAi assays.
13224	T13C5.3	T13C5.3	6.52620523094063	1.8175	0.278492621007881	0	None
8803	nep-17	F54F11.2	6.52182492194755	0.6475	0.0992820273081852	0	nep-17 encodes a neprilysin; neprilysins are thermolysin-like zinc metallopeptidases, found on the outer surface of animal cells, that negatively regulate small signalling peptides (e.g., enkephalin, tachykinin, insulin, and natriuretic peptides) by cleaving them; NEP-17 has no clear orthologs in other organisms.
10174	K04F10.2	K04F10.2	6.51752307335671	1.0425	0.159953403810979	0	K04F10.2 is an ortholog of human KIAA0556 (KIAA0556); K04F10.2 is expressed in the nervous system.
881	C04F12.2	C04F12.2	6.50549719928972	0.755	0.1160556951869	0	None
18420	ZC477.7	ZC477.7	6.50077061078839	1.61	0.247662945886464	0	non-coding Transcript Isoform
18686	ZK180.5	ZK180.5	6.49779971357831	0.7	0.107728774486112	0	None
3528	gcy-36	C46E1.2	6.48914497169375	1.435	0.221138533082494	0	gcy-36 encodes a soluble guanylate cyclase; GCY-36 activity is required in the URX sensory neurons to sense increases in O2 levels and effect corresponding behavioral changes; gcy-36 genetically interacts with npr-1 with respect to feeding behavior; a gcy-36 reporter fusion is expressed in the AQR, PQR, and URX neurons.
11759	R09F10.5	R09F10.5	6.47969537467927	1.3425	0.207185665740722	0	R09F10.5 is involved in reproduction; R09F10.5 is expressed in certain ventral cord neurons, intestine, gonadal sheath cell, head neurons, tail neurons, and the head muscle.
11605	cut-5	R07E3.3	6.472199718776	1.3775	0.212833358031867	0	cut-5 is involved in body morphogenesis; cut-5 is expressed in the seam cell.
14336	VZK822L.2	VZK822L.2	6.4661505493414	1.3125	0.202980117766309	0	None
9380	dct-18	F58G1.4	6.4548768638443	0.9025	0.139816764755835	0	dct-18 is expressed in the intestine.
6055	hil-3	F22F1.1	6.45362308542589	2.4225	0.375370542706575	0	hil-3 is an ortholog of members of the human Histones family including H1F0; hil-3 is predicted to have DNA binding activity, based on protein domain information; hil-3 is expressed in several tissues including the tail.
8996	efn-4	F56A11.3	6.44434351960117	1.1125	0.172632013891905	0	efn-4 encodes a divergent member of the ephrin family of ligands; efn-4 is required for neuroblast migrations during closure of the ventral gastrulation cleft and subsequent epidermal morphogenesis, possibly functioning independently of EFN-1, EFN-2, EFN-3, and the VAB-1 receptor during morphogenesis; EFN-4 can interact weakly with VAB-1 in vitro; EFN-4 is expressed in neural and epidermal precur…
7759	insc-1	F43E2.3	6.4428579032658	1.37	0.212638555834914	0	insc-1 is an ortholog of human INSC (inscuteable (Drosophila)).
483	fkb-7	B0511.1	6.44156174086353	2.495	0.387328430646313	0	fkb-7 encodes a peptidylprolyl cis/trans isomerase homologous to mammalian FK506-binding proteins; by homology, FKB-7 could function in a number of different processes including protein folding, signal transduction, and regulation of muscle contraction; however, as loss of fkb-7 function via RNA-mediated interference (RNAi) does not result in any obvious abnormalities, the precise role of FKB-7 i…
5026	dmd-5	F10C1.5	6.43525797430839	0.8975	0.139466048382692	0	dmd-5 is an ortholog of human DMRTA2 (DMRT-like family A2); dmd-5 is involved in hermaphrodite genitalia development, locomotion, the molting cycle, oviposition and receptor-mediated endocytosis; dmd-5 is predicted to have sequence-specific DNA binding activity and transcription factor activity, sequence-specific DNA binding, based on protein domain information; dmd-5 is expressed in the nervous …
12425	T04C4.3	T04C4.3	6.42837489097287	1.075	0.167227334782479	0	None
3744	phat-3	C49G7.4	6.4261988558123	0.8125	0.126435552062806	0	phat-3 is expressed in the g1P, g1AR, and the pharyngeal gland cell.
9773	H23N18.5	H23N18.5	6.42414262008171	3.32	0.516800481611626	0	None
16775	Y51H7C.10	Y51H7C.10	6.42123349877986	0.6725	0.104730656520711	0	None
499	B0513.4	B0513.4	6.41327036144894	0.8625	0.134486767497689	0	None
4894	mlt-9	F09B12.1	6.40694294362904	1.7125	0.267288161462852	0	mlt-9 is involved in locomotion, the molting cycle, nematode larval development and reproduction; mlt-9 is expressed in the hypodermis.
3090	best-8	C37A5.1	6.40277086326736	1.1225	0.175314722949055	0	best-8 is an ortholog of members of the human BEST (Bestrophins) family including BEST1; best-8 is involved in lipid storage.
3220	C40A11.4	C40A11.4	6.40201467139716	2.4925	0.389330566694256	0	C40A11.4 is an ortholog of human KCTD10 (potassium channel tetramerization domain containing 10), TNFAIP1 (tumor necrosis factor, alpha-induced protein 1 (endothelial)) and KCTD13 (potassium channel tetramerization domain containing 13).
2012	glb-5	C18C4.1	6.39625731509845	0.595	0.093023149427634	0	glb-5 encodes, by alternative splicing, two isoforms of a globin; GLB-5 participates in oxygens (O2) sensing; glb-5 expression is induced by anoxia in a HIF-1 dependent manner, although glb-5 is also paradoxically upregulated in a hif-1 mutant background.
7359	tsp-14	F39C12.3	6.39611901573506	1.445	0.22591824768194	0	tsp-14 is an ortholog of members of the human TSPAN (Tetraspanins) family including TSPAN10.
2314	C26B9.3	C26B9.3	6.39388510184939	1.6225	0.253758078876128	0	C26B9.3 is involved in determination of adult lifespan, hermaphrodite genitalia development, locomotion and oviposition.
16897	clec-100	Y53H1A.3	6.39008824085139	1.1745	0.183800278764776	0	None
12507	T05B11.7	T05B11.7	6.38554607974979	1.345	0.210631946461923	0	T05B11.7 is involved in embryo development.
18955	pmt-1	ZK622.3	6.38508878954155	0.8875	0.138995717875322	0	pmt-1 encodes, by alternative splicing, four isoforms of an experimentally validated phosphoethanolamine N-methyltransferase required for phosphocholine biosynthesis and viability; PMT-1 lacks known mammalian orthologs, but has orthologs in parasitic nematodes, fish, amphibians, echinoderms, plants, alveolata, and bacteria; PMT-1 is distantly paralogous to PMT-2; PMT-1 catalyses the conversion of…
2458	spp-10	C28C12.7	6.38414769748598	1.1475	0.17974208216578	0	spp-10 encodes two protein isoforms that are orthologous to the human gene PROSAPOSIN (PSAP; OMIM:176801, mutated in Gaucher disease and metachromatic leukodystrophy); SPP-10A and -10B are predicted to have 3 and 4 embedded saposin sequences, that are likely to be split into individual saposin peptides by proteolysis; in mammals, saposins activate the enzymes sphingomyelinphosphodiesterase and be…
10708	K10C2.7	K10C2.7	6.37496493000432	1.7175	0.269413246795514	0	None
10390	K07E3.4	K07E3.4	6.36536528077194	0.8825	0.138640904500139	0	K07E3.4 is an ortholog of human MTHFD1L (methylenetetrahydrofolate dehydrogenase (NADP+ dependent) 1-like) and MTHFD1 (methylenetetrahydrofolate dehydrogenase (NADP+ dependent) 1, methenyltetrahydrofolate cyclohydrolase, formyltetrahydrofolate synthetase); K07E3.4 is predicted to have ATP binding activity and formate-tetrahydrofolate ligase activity, based on protein domain information; K07E3.4 i…
7702	cyn-6	F42G9.2	6.35838615226524	0.78	0.122672637572054	0	cyn-6 encodes a cyclophilin most similar to human secreted cyclophilin type B isoforms that is functional when expressed in E. coli; it is expressed in the intestine.
7595	F41G3.2	F41G3.2	6.34636124033297	1.8825	0.296626669789322	0	None
7535	unc-6	F41C6.1	6.3439590321019	1.4475	0.22816982150662	0	unc-6 encodes a netrin orthologous to the human and mouse netrin-1 precursor proteins; UNC-6 functions as a guidance molecule that regulates circumferential axon migrations as well as migration of mesodermal cells, such as the gonadal distal tip cell, along the dorsoventral axis; in addition, UNC-6 mediates anchor cell (AC) invasion by regulating localization of the UNC-40 netrin receptor to the …
1432	C09G9.8	C09G9.8	6.34112206965415	1.84	0.290169465244241	0	None
19150	ZK836.3	ZK836.3	6.34104288351664	1.41	0.222360899603006	0	None
7125	F36G3.1	F36G3.1	6.33358895858721	0.5525	0.0872333212042296	0	Uncharacterized protein F36G3.1
15422	cht-4	Y22D7AL.14	6.33333959170161	1.2875	0.203289272801189	0	cht-4 is predicted to have chitinase activity, based on protein domain information.
9587	dyf-18	H01G02.2	6.31753227248885	2.36	0.37356358435669	0	dyf-18 is predicted to have ATP binding activity and protein kinase activity, based on protein domain information; dyf-18 is expressed in the nervous system and the head.
9882	K01A2.5	K01A2.5	6.30561653856513	1.265	0.200614799879324	0	K01A2.5 is an ortholog of human BPHL (biphenyl hydrolase-like (serine hydrolase)); K01A2.5 is expressed in the hypodermis.
12554	T05E11.9	T05E11.9	6.29305493764313	1.15	0.182741134694543	0	Possible non-coding RNA gene
81	B0035.13	B0035.13	6.29196335954018	0.505	0.0802611158302909	0	None
14710	W06F12.2	W06F12.2	6.28948870863846	1.255	0.199539272290335	0	None
11098	somi-1	M04G12.4	6.28492098179529	0.9475	0.150757663102607	0	somi-1 is expressed in the hyp7 syncytium, seam cell, intestine, somatic gonad, body wall musculature, head neurons, tail neurons, DTC, and the vulval precursor cell; somi-1 is localized to the nuclear chromosome.
8514	lec-2	F52H3.7	6.28318057186415	0.76	0.120957847909584	0	lec-2 encodes a 'tandem repeat' type galectin (beta-galactosyl-binding lectin) containing two, tandemly arranged carbohydrate recognition domains; by homology, LEC-2 may play roles in cell adhesion and aggregation, proliferation, or programmed cell death.
11140	cut-6	M142.2	6.28305547602274	1.495	0.237941556573102	0	cut-6 is an ortholog of human VIT (vitrin), MATN1 (matrilin 1, cartilage matrix protein), COCH (cochlin), MATN2 (matrilin 2), VWA2 (von Willebrand factor A domain containing 2), MATN3 (matrilin 3) and MATN4 (matrilin 4) and members of the Fibronectin type III domain containing family including VWA1 and COL (Collagens) family including COL6A5; cut-6 is involved in body morphogenesis; cut-6 is expr…
5810	nlr-1	F20B10.1	6.27976394858774	0.8325	0.132568677233039	0	nlr-1 is an ortholog of human CNTNAP3B (contactin associated protein-like 3B), CNTNAP4 (contactin associated protein-like 4), CNTNAP3 (contactin associated protein-like 3), CNTNAP5 (contactin associated protein-like 5), CNTNAP2 (contactin associated protein-like 2) and CNTNAP1 (contactin associated protein 1); nlr-1 is involved in embryo development, nematode larval development and reproduction; …
13007	cyp-13A6	T10B9.3	6.2691317732984	1.6	0.255218754025039	0	cyp-13A6 encodes one of ~80 C. elegans cytochrome P450s: membrane-associated, heme-containing NADPH-dependent monooxygenases that catalyze the oxidative metabolism of a variety of exogenous compounds and endogenous substrates; loss of cyp-13A6 activity in large-scale RNAi screens results in decreased and/or slow growth and cadmium hypersensitivity; cyp-13A6 expression is upregulated in response t…
8984	F55H12.2	F55H12.2	6.26352400499224	1.8675	0.298154840392013	0	None
9085	F56D3.1	F56D3.1	6.25538627055249	2.805	0.448413555723116	0	None
253	B0284.1	B0284.1	6.25194148792149	0.775	0.123961492841427	0	B0284.1 is an ortholog of human ALS2CR12 (amyotrophic lateral sclerosis 2 (juvenile) chromosome region, candidate 12); B0284.1 is involved in nematode larval development, positive regulation of growth and reproduction; B0284.1 is expressed in the pharynx, hypodermis, nervous system, reproductive system, coelomocyte, intestine, rectal gland cell, rectal epithelium, and the body wall musculature.
7931	sdpn-1	F45E1.7	6.25182986205902	0.8675	0.138759374317696	0	sdpn-1 encodes the C. elegans syndapin ortholog; an SDPN-1::GFP fusion protein is highly expressed in the intestine, where it localizes to basolateral recycling endosomes; SDPN-1 localization to basolateral recycling endosomes is dependent upon ALX-1, one of two C. elegans Bro1 domain-containing proteins, and RME-1.
6215	F25E5.8	F25E5.8	6.25141626714734	0.9	0.143967376597478	0	None
6672	F31D4.8	F31D4.8	6.24745166532433	0.8225	0.131653679621914	0	None
14313	VC5.2	VC5.2	6.24588558199732	0.96	0.153701182546	0	VC5.2 is an ortholog of human LAMA2 (laminin, alpha 2) and LAMA1 (laminin, alpha 1).
14994	Y105C5B.5	Y105C5B.5	6.2346156875156	0.805	0.129117822227913	0	non-coding Transcript Isoform
10435	K08A2.1	K08A2.1	6.22125229040777	0.7	0.112517539447692	0	None
15781	fbxa-149	Y38H6C.10	6.2207438161825	0.5925	0.0952458447908889	0	This gene encodes a protein containing an F-box, a motif predicted to mediate protein-protein interactions either with homologs of yeast Skp-1p or with other proteins.
18391	ugt-16	ZC443.6	6.2191062454767	2.51	0.40359497022994	0	ugt-16 is an ortholog of human UGT3A2 (UDP glycosyltransferase 3 family, polypeptide A2) and UGT3A1 (UDP glycosyltransferase 3 family, polypeptide A1); ugt-16 is predicted to have transferase activity, transferring hexosyl groups, based on protein domain information; ugt-16 is expressed in the pharynx and the intestine.
1262	C08B6.4	C08B6.4	6.21778545754966	3.1325	0.503796732998644	0	C08B6.4 is predicted to have chitinase activity, based on protein domain information.
5549	F16A11.5	F16A11.5	6.21558719634838	1.9375	0.31171632523123	0	Possible non-coding RNA gene
17935	grl-15	Y75B8A.20	6.20758794217602	3.14	0.505832543855883	0	grl-15 encodes a hedgehog-like protein, with an N-terminal signal sequence, a central proline-rich low-complexity region, and a C-terminal Ground-like (Grl) domain; GRL-15 is expressed in the reproductive system, vulva, and larval hypodermis; the Grl domain is predicted to form a cysteine-crosslinked protein involved in intercellular signalling, and it has subtle similarity to the N-terminal Hedg…
18513	ZK1055.4	ZK1055.4	6.20461661379302	2.566	0.413563022459069	0	None
3357	efn-2	C43F9.8	6.20358715400179	0.94	0.151525234781884	0	efn-2 is an ortholog of human EFNB3 (ephrin-B3); efn-2 is involved in inductive cell migration and negative regulation of ovulation; efn-2 is expressed in the pm6VR, pm5VR, M cell, exc_gl_R, exc_gl_L nucleus, arc ant V, hyp2, G1, certain interneurons, certain inner labial neurons, certain ventral cord neurons, certain amphid neurons, hyp7 syncytium, MSappapp, certain outer labial neurons, neurobl…
16084	Y41G9A.10	Y41G9A.10	6.19180901848762	1.83	0.295551751440646	0	None
3442	lron-1	C44H4.1	6.19017665981545	1.755	0.283513718015977	0	lron-1 is an ortholog of human GP5 (glycoprotein V (platelet)), LRRC15 (leucine rich repeat containing 15) and LRRC32 (leucine rich repeat containing 32); lron-1 is expressed in the pharynx.
3207	trim-9	C39F7.2	6.18706333524382	0.8375	0.13536308820847	0	madd-2 encodes a protein containing RBCC/TRIM, fibronectin type III, and SPRY domains that is the sole C. elegans member of the C1 subfamily of tripartite motif (TRIM) proteins and is homologous to mammalian TRIM9, TRIM67, and MID1/TRIM18, mutations in which result in Opitz G/BBB syndrome, a congenital malformation disorder affecting ventral midline structures and resulting in mental retardation;…
6428	F27D9.7	F27D9.7	6.18188398819862	1.9	0.307349669393206	0	F27D9.7 is an ortholog of human ADAM8 (ADAM metallopeptidase domain 8) and members of the ADAM (ADAM metallopeptidase domain containing) family including ADAM30; F27D9.7 is predicted to have metalloendopeptidase activity, based on protein domain information.
5886	F21A9.1	F21A9.1	6.17345064975274	1.3675	0.221513069041019	0	None
11085	ins-23	M04D8.3	6.17210616269512	1.085	0.175790884245942	0	ins-23 encodes an insulin-like peptide of the insulin superfamily of proteins (OMIM:176730, 147440); INS-23 is one of 38 insulin-like peptides in C. elegans, and is expressed in amphid sensory neurons, labial neurons, the nerve ring, and ventral nerve cord neurons; as loss of INS-23 function via RNA-mediated interference does not results in any abnormalities, the precise role of INS-23 in C. eleg…
2789	C33D9.6	C33D9.6	6.16393878082902	1.19	0.193058374249452	0	C33D9.6 is involved in embryo development; C33D9.6 is expressed in the muscle cell, all ventral cord neurons, and the hypodermis.
14320	VF13D12L.3	VF13D12L.3	6.15879819843558	0.8275	0.134360629028273	0	VF13D12L.3 is orthologous to the human gene ARGININOSUCCINATE SYNTHETASE (ASS; OMIM:603470), which when mutated leads to classic citrullinemia.
14711	W06F12.3	W06F12.3	6.15604862669667	1.6575	0.269247385865666	0	W06F12.3 is an ortholog of human TTBK2 (tau tubulin kinase 2) and TTBK1 (tau tubulin kinase 1); W06F12.3 is predicted to have ATP binding activity and protein kinase activity, based on protein domain information.
13218	T13C2.3	T13C2.3	6.1551228195229	1.775	0.288377673694834	0	None
18883	grl-11	ZK512.9	6.14590895855703	2.345	0.38155462695799	0	grl-11 encodes a hedgehog-like protein, with an N-terminal signal sequence and a C-terminal Ground-like (Grl) domain; GRL-11 is expressed in larval pharynx; the Grl domain is predicted to form a cysteine-crosslinked protein involved in intercellular signalling, and it has subtle similarity to the N-terminal Hedge domain of HEDGEHOG proteins.
6613	F30A10.14	F30A10.14	6.14329183901745	0.8575	0.139583145725525	0	None
3629	C47E8.9	C47E8.9	6.126235716192	1.385	0.226076838071928	0	None
19136	ZK822.5	ZK822.5	6.12622829625807	0.8975	0.146501233156492	0	ZK822.5 is an ortholog of human SLC5A5 (solute carrier family 5 (sodium/iodide cotransporter), member 5), SLC5A6 (solute carrier family 5 (sodium/multivitamin and iodide cotransporter), member 6) and SLC5A12 (solute carrier family 5 (sodium/monocarboxylate cotransporter), member 12); ZK822.5 is involved in striated muscle myosin thick filament assembly; ZK822.5 is predicted to have transporter ac…
10832	K11H12.6	K11H12.6	6.11917759015308	0.7925	0.129510867812577	0	None
10270	nmtn-1	K06A5.8	6.11752393174631	0.895	0.146301021456652	0	nmtn-1 is an ortholog of human WDR47 (WD repeat domain 47).
11328	R02F2.2	R02F2.2	6.11509157744974	1.2275	0.200732889189522	0	R02F2.2 encodes a guanine nucleotide exchange factor of the Dbl family; R02F2.2 plays a role in aging, and appears to be recruited, under conditions of oxidative stress, to effect loss of neuronal function via dysregulation of RHO-1 GTPase-mediated signaling and subsequent effects on the actin cytoskeleton and actin dynamics; an R02F2.2::GFP reporter fusion is expressed in body wall muscles, head…
18658	cyp-13A10	ZK1320.4	6.11361331223112	1.0975	0.179517405493131	0	cyp-13A10 encodes one of ~80 C. elegans cytochrome P450s: membrane-associated, heme-containing NADPH-dependent monooxygenases that catalyze the oxidative metabolism of a variety of exogenous and endogenous compounds.
5275	F13B9.2	F13B9.2	6.10504671696986	2.2725	0.372233023816715	0	None
11596	fbxc-34	R07C3.5	6.09972163534797	2.5375	0.416002590232176	0	None
6246	F25H5.2	F25H5.2	6.09919304316308	0.8125	0.133214343971417	0	None
3401	C44C1.1	C44C1.1	6.07998013273606	0.98	0.161184737220348	0	C44C1.1 is involved in locomotion, nematode larval development and positive regulation of growth.
16169	Y43F8B.7	Y43F8B.7	6.066519392317	1.94	0.319787982950641	0	None
4622	lipl-7	F01G10.7	6.06336647383639	0.64	0.105551924456755	0	lipl-7 is an ortholog of members of the human Lipases family including LIPF; lipl-7 is predicted to have hydrolase activity, acting on ester bonds, based on protein domain information.
5896	F21C10.7	F21C10.7	6.0626961013501	0.9725	0.160407182504733	0	None
1973	ceh-48	C17H12.9	6.06266798171632	1.09	0.179788832785698	0	ceh-48 encodes a ONECUT class CUT homeobox protein with a single N-terminal cut domain; the cut domain may be a compact DNA-binding domain composed of alpha helices; CEH-48 is strongly affiliated with, and may be orthologous to, Drosophila ONECUT and mammalian HNF6 proteins; ceh-48 has no obvious function in mass RNAi assays.
2670	C31H5.6	C31H5.6	6.06049341490472	0.7475	0.123339792460075	0	C31H5.6 is an ortholog of human BAAT (bile acid CoA:amino acid N-acyltransferase) and members of the ACOT (Acyl-CoA thioesterases) family including ACOT2; C31H5.6 is involved in reproduction; C31H5.6 is predicted to have thiolester hydrolase activity, based on protein domain information.
3565	phat-2	C46H11.9	6.05214852196717	3.075	0.50808402814948	0	phat-2 is expressed in the g2R, g2L, g1P, g1AR, and the g1AL.
9946	bcat-1	K02A4.1	6.04999117880692	0.7925	0.130991926529765	0	bcat-1 encodes a branched-chain amino acid aminotransferase that, by homology, is predicted to catalyze the first reaction in the catabolism of essential branched-chain amino acids such as leucine, isoleucine, and valine; in C. elegans, large-scale RNA-mediated interference (RNAi) screens indicate that bcat-1 activity is required for embryonic and larval development.
2010	C18B2.5	C18B2.5	6.04109691827769	0.6625	0.109665514220699	0	C18B2.5 is an ortholog of human SEPT5 (septin 5), SEPT1 (septin 1) and SEPT4 (septin 4); C18B2.5 is predicted to have GTP binding activity, based on protein domain information.
8256	F48E3.8	F48E3.8	6.0355848209768	1.215	0.201306093119136	0	F48E3.8 encodes a polysaccharide deacetylase.
17927	osm-12	Y75B8A.12	6.03536044986517	1.3625	0.225752879437456	0	osm-12 encodes a protein that is an ortholog to human BBS7; osm-12 along with bbs-8 is required for cilia biogenesis and function, accordingly, osm-12 mutant animals display odorant chemotaxis defects; oms-12 and bbs-8 are required for intraflagellar transport (IFT) and the motility and function of IFT proteins like OSM-5, CHE-11 and CHE-2; in addition to the sensory defects exhibited by bbs muta…
16722	slo-1	Y51A2D.19	6.03257775486099	1.635	0.271028417111165	0	slo-1 encodes a voltage- and calcium-activated potassium (BK) channel; SLO-1 activity is required for muscle inactivation: mutants have wild-type levels of motor activity, but have less smooth movement and tend to stop and reverse direction; SLO-1 is expressed in neurons and in body wall and vulval muscle; SLO-1 localization in proximity to the EGL-19 L-type calcium channel in muscle membrane is …
16764	Y51H4A.7	Y51H4A.7	6.02830113874051	0.825	0.136854477076168	0	Y51H4A.7 is an ortholog of human UROC1 (urocanate hydratase 1); Y51H4A.7 is predicted to have urocanate hydratase activity, based on protein domain information.
7553	tbc-18	F41D9.1	6.02413293787821	0.92	0.152719073348345	0	tbc-18 is an ortholog of human SGSM3 (small G protein signaling modulator 3); tbc-18 is involved in lipid storage; tbc-18 is expressed in the nervous system.
17560	Y69A2AR.25	Y69A2AR.25	6.02058857338147	0.8275	0.137445033805928	0	None
13573	dod-6	T20G5.7	6.01750314789223	0.8725	0.144993692326628	0	dod-6 is involved in determination of adult lifespan.
12129	R90.1	R90.1	6.01523704143506	1.385	0.230248615384504	0	R90.1 is an ortholog of human TTBK2 (tau tubulin kinase 2) and TTBK1 (tau tubulin kinase 1); R90.1 is involved in locomotion and nematode larval development; R90.1 is predicted to have ATP binding activity and protein kinase activity, based on protein domain information.
4909	pes-7	F09C3.1	6.00394333590314	0.6175	0.102849071927011	0	pes-7 encodes an IQGAP ortholog; IQGAP proteins bind actin and CLIP-170, effect activities of the Rho family GTPases Rac1 and Cdc42, and function in cytokinesis; PES-7 is required for completing meiosis and mitosis, and for germline formation and maintenance; IQGAP's alpha-actinin domain is related distantly to alpha-actinin domains in calponin, transgelin (SM22 alpha), and the proto-oncogene Vav…
6368	F26G1.11	F26G1.11	6.00184261110656	1.955	0.32573330003393	0	None
18792	ZK370.6	ZK370.6	6.00017509606182	1.0425	0.173744929657843	0	None
13398	T18D3.7	T18D3.7	5.99155988176114	0.6275	0.104730656520711	0	T18D3.7 is an ortholog of human TSC22D3 (TSC22 domain 3); T18D3.7 is predicted to have transcription factor activity, sequence-specific DNA binding, based on protein domain information; T18D3.7 is expressed in the pharyngeal muscle cell, body wall musculature, and the nerve ring.
15184	Y116A8B.1	Y116A8B.1	5.98137122292269	1.3125	0.219431289429094	0	None
5922	F21D9.4	F21D9.4	5.97655639439526	1.31	0.219189766406036	0	None
7110	F36F12.1	F36F12.1	5.97393272352509	2.39	0.400071462235971	0	None
10354	K07C11.7	K07C11.7	5.97141478024882	1.835	0.307297360429472	0	K07C11.7 encodes one of three C. elegans metallophoshopesterase that are related to human 239FB, which is encoded by a gene in the 11p13-p14 chromosomal region associated with various tumors and WAGR (Wilms' tumor, aniridia, genitourinary anomalies, and mental retardation) syndrome.
9501	F59C6.14	F59C6.14	5.9706907720888	1.0825	0.181302305096818	0	None
4269	D1053.4	D1053.4	5.96562082938125	0.6275	0.105186034772693	0	D1053.4 is predicted to have transmembrane receptor protein serine/threonine kinase activity, based on protein domain information.
15315	Y17D7C.3	Y17D7C.3	5.96384664791443	1.01	0.169353784499674	0	None
8162	clec-78	F47C12.2	5.95935173897215	1.16	0.194652044519204	0	clec-78 is predicted to have calcium ion binding activity, based on protein domain information; clec-78 is expressed in the pharyngeal muscle cell.
14254	col-117	T28C6.4	5.95710475816655	3.11	0.522065688997079	0	col-117 is an ortholog of members of the human COL (Collagens) family including COL4A2; col-117 is involved in body morphogenesis, lipid storage, locomotion, nematode larval development and receptor-mediated endocytosis; col-117 is a structural constituent of cuticle, based on protein domain information.
6931	glb-15	F35B12.8	5.95291600176044	0.695	0.116749505585913	0	glb-15 encodes a globin with no obvious function in mass RNAi assays.
4874	ugt-65	F08G5.5	5.95169329312082	0.835	0.140296207965744	0	ugt-65 is an ortholog of members of the human UGT (UDP glucuronosyltransferases) family including UGT3A1; ugt-65 is predicted to have transferase activity, transferring hexosyl groups, based on protein domain information.
18332	ZC374.2	ZC374.2	5.9464820295594	2.485	0.417894141047984	0	ZC374.2 is an ortholog of human NCAM1 (neural cell adhesion molecule 1), VSIG10L (V-set and immunoglobulin domain containing 10 like) and IGDCC4 (immunoglobulin superfamily, DCC subclass, member 4).
13012	cyp-13A1	T10B9.8	5.93385381468808	0.7425	0.125129472883556	0	cyp-13A1 encodes one of ~80 C. elegans cytochrome P450s, membrane-associated, heme-containing NADPH-dependent monooxygenases that catalyze the oxidative metabolism of a variety of exogenous and endogenous compounds.
6596	ceh-22	F29F11.5	5.9329270504221	1.52	0.256197318302078	0	ceh-22 encodes an NK-2 family homeodomain factor homologous to Drosophila TINMAN and vertebrate Nkx2-5 proteins; CEH-22 activates pharyngeal muscle gene expression in combination with PHA-1 and is required for normal pharyngeal development; ceh-22 is the first gene known to be expressed in pharyngeal muscles, being exclusively active in that tissue.
14198	T27F6.10	T27F6.10	5.92892394265598	1.1845	0.199783301566419	0	None
1938	cysl-1	C17G1.7	5.92879488626177	1.22	0.205775376514878	0	cysl-1 encodes a homolog of sulfhydrylases/cysteine synthases; CYSL-1 functions in neurons to transduce signals from H2S (hydrogen sulfide), which accumulates during hypoxia, to the EGL-9 proline hydroxylase to regulate O2-dependent behavioral plasticity in C. elegans via neuronal activation of the HIF-1 hypoxia-inducible transcription factor.; specifically, CYSL-1 physically interacts with EGL-9…
2877	C34C6.7	C34C6.7	5.92566597698804	1.43	0.241323085970981	0	None
13725	mup-2	T22E5.5	5.92045072992797	0.6775	0.11443385493865	0	mup-2 encodes the muscle contractile protein troponin T ( TnT ) homologous to vertebrate and invertebrate TnT and contains an invertebrate- specific COOH -terminal tail; mup-2 affects embryonic body wall muscle cell contraction, sarcomere organization, cell positioning, regulated muscle contraction in larval and adult body wall muscle, epidermal morphogenesis, and is required for proper function …
6789	F32D8.3	F32D8.3	5.91231585865062	0.8475	0.143344844940917	0	F32D8.3 encodes a putative secreted TIL-domain protease inhibitor paralogous to SWM-1, ISL-1, and the products of 11 other C. elegans genes; F32D8.3 and its relatives are collectively similar to other TIL-domain protease inhibitors from nematodes, insects, and vertebrates; F32D8.3 has no obvious function in mass RNAi assays.
7624	nfm-1	F42A10.2	5.90431736541102	0.6475	0.109665514220699	0	nfm-1 encodes a homolog of human merlin/schwannomin (NF2), which when mutated leads to neurofibromatosis, type 2 (OMIM:101000); at the same time, it is also homologous to the ERM family of cytoskeletal linkers with approximately equal similarity to ezrin, radixin and moesin.
17699	tln-1	Y71G12B.11	5.89996488995201	0.825	0.139831340590691	0	tln-1 is an ortholog of human TLN1 (talin 1); tln-1 is involved in body morphogenesis, embryo development, germ cell development, hermaphrodite genitalia development, inductive cell migration, nematode larval development, ovulation, protein catabolic process and receptor-mediated endocytosis; tln-1 is predicted to have actin filament binding activity, insulin receptor binding activity, and is a s…
1971	C17H12.7	C17H12.7	5.89804779789392	0.49	0.0830783365599325	0	C17H12.7 is involved in embryo development and nematode larval development.
8537	F53A9.6	F53A9.6	5.89275542005619	1.0675	0.181154642252201	0	F53A9.6 is involved in innate immune response.
12522	T05C1.3	T05C1.3	5.89149592707649	2.875	0.487991511084121	0	None
5680	F18A11.2	F18A11.2	5.89047569491596	0.88	0.149393706990341	0	F18A11.2 is an ortholog of members of the human SEC14 (SEC14) family including SEC14L2.
4351	gstk-2	D2024.7	5.89030116126471	1.1125	0.188869799614989	0	gstk-2 encodes one of two C. elegans kappa class glutathione transferases; while gstk-2(RNAi) animals exhibit no obvious developmental or morphological abnormalities, animals doubly mutant for gstk-2 and gstk-1 exhibit decreased respiration and a lower concentration of the monounsaturated fatty acid cis-vaccenic acid; GSTK-2 is expressed primarily in the pharynx, muscles, and epidermis and locali…
1802	C16B8.4	C16B8.4	5.89027864079962	0.975	0.165526974097042	0	C16B8.4 is involved in embryo development; C16B8.4 is expressed in certain interneurons.
4904	ggr-3	F09C12.1	5.88640342737545	0.655	0.111273379081332	0	ggr-3 encodes a predicted member of the GABA/ glycine receptor family of ligand-gated chloride channels; expressed in the AVA, AVB, SMDD, DVA, SIAD, and in some other neurons of the nerve ring.
8725	iff-2	F54C9.1	5.87923755090535	0.7425	0.126291886247335	0	iff-2 is an ortholog of human EIF5AL1 (eukaryotic translation initiation factor 5A-like 1), EIF5A (eukaryotic translation initiation factor 5A) and EIF5A2 (eukaryotic translation initiation factor 5A2); iff-2 is involved in embryo development, gamete generation, gonad morphogenesis, growth, hermaphrodite genitalia development, locomotion, nematode larval development, nematode male tail tip morpho…
15064	madf-10	Y106G6H.4	5.87506458184469	0.7025	0.119573153658751	0	madf-10 is expressed in all motor neurons, ventral nerve cord, head neurons, and the head muscle.
9307	F58B4.5	F58B4.5	5.87466517133351	1.34	0.228098106176123	0	None
7035	F35G2.5	F35G2.5	5.86832080493723	2.0825	0.354871532968668	0	None
14324	cnc-10	VK10D6R.1	5.86661008505242	0.985	0.167899346593647	0	cnc-10 encodes one of eleven C. elegans caenacin peptides.
15964	bkip-1	Y39G8C.3	5.8650836858735	1.7225	0.293687199067385	0	bkip-1 encodes a novel transmembrane protein conserved amongst nematodes; genetic studies indicate that BKIP-1 functions to regulate the activity of the SLO-1 Ca2+- and voltage-gated potassium channel; BKIP-1 and SLO-1 interact in vitro; a BKIP-1::GFP fusion protein is expressed in most neurons, body wall muscles cells, and the head mesodermal cell, and localizes to the nerve ring and the dense b…
6897	F33H2.8	F33H2.8	5.86297573182395	0.9	0.153505666945685	0	F33H2.8 is involved in determination of adult lifespan and locomotion.
9215	mrp-1	F57C12.5	5.85955898752429	0.9525	0.162554895688906	0	mrp-1 encodes an ATP-binding cassette (ABC) transporter most closely related to the multidrug resistance-associated proteins; mrp-1 activity is required for efficient RNA interference (RNAi) of a germline-expressed target, pop-1.
4600	tsp-16	F01E11.4	5.85496814000151	1.2225	0.208797037109016	0	None
17636	Y71A12B.11	Y71A12B.11	5.84966128106769	2.7175	0.46455681268164	0	None
10140	K04B12.2	K04B12.2	5.84961869038928	0.5625	0.0961601139787399	0	None
18528	sym-2	ZK1067.6	5.84409365825567	0.8875	0.151862727036599	0	sym-2 encodes a predicted RNA binding protein that contains three RNA recognition motifs (RRMs) similar to those of Drosophila Fusilli and mammalian hnRNP F and H; genetic analyses indicate that, during embryonic development, sym-2 functions redundantly with mec-8, which also encodes an RRM-containing protein, to affect the structure of body wall muscles or their attachment to the body cuticle, p…
17562	ngn-1	Y69A2AR.29	5.84381561996999	1.135	0.19422241799029	0	ngn-1 encodes a member of the neurogenein family that is required for axonal guidance and connectivity of a subset of neurons, and also affects locomotion.
9830	H36L18.1	H36L18.1	5.83496328317641	1.5725	0.26949612597116	0	H36L18.1 is an ortholog of members of the human MMP (Matrix metallopeptidases) family including MMP19; H36L18.1 is predicted to have calcium ion binding activity, metalloendopeptidase activity, and zinc ion binding activity, based on protein domain information.
19216	ces-2	ZK909.4	5.83176116974484	2.0475	0.351094624831761	0	ces-2 encodes a basic region leucine-zipper (bZIP) transcription factor, most similar in sequence and binding specificity to the PAR (proline- and acid-rich) subfamily of bZIP proteins; ces-2 is required to activate programmed cell death in the sister cells of the serotoninergic neurosecretory motor (NSM) neurons, and is transcriptionally inhibited by activated LET-60(G12V); in regulating program…
8327	F49D11.6	F49D11.6	5.82742402387789	3.2725	0.561568883024629	0	F49D11.6 is predicted to have sulfotransferase activity, based on protein domain information.
461	cpna-5	B0495.10	5.82351625590152	1.4475	0.248561167582062	0	cpna-5 is an ortholog of human CPNE9 (copine family member IX), CPNE5 (copine V) and CPNE8 (copine VIII); cpna-5 is expressed in the nervous system.
14684	nmat-1	W06B3.1	5.82288043474084	0.73	0.12536750637101	0	nmat-1 is an ortholog of human NMNAT3 (nicotinamide nucleotide adenylyltransferase 3), NMNAT1 (nicotinamide nucleotide adenylyltransferase 1) and NMNAT2 (nicotinamide nucleotide adenylyltransferase 2); nmat-1 is predicted to have nucleotidyltransferase activity, based on protein domain information.
8160	F47C12.12	F47C12.12	5.82004163429107	0.835	0.143469764044344	0	None
5277	cutl-29	F13B9.6	5.81359941703826	1.67	0.287257494058781	0	None
7618	elo-5	F41H10.7	5.8133290428017	0.5675	0.0976204848928518	0	The elo-5 gene encodes a paralog of elo-1 and elo-2, each of which encodes a polyunsaturated fatty acid (PUFA) elongase; ELO-5 is required for normally rapid growth and for normal fatty acid composition.
11323	R02F11.1	R02F11.1	5.81277172690739	2	0.34406993667788	0	None
3937	cpr-1	C52E4.1	5.81244984374705	0.94	0.161721825610459	0	cpr-1 encodes a cysteine protease of the cathepsin B-like cysteine protease family; cpr-1 appears to be required for embryogenesis; cpr-1 is specifically expressed in the gut of all stages except the embryo and around developing embryos in the gonad; expression of cpr-1 is regulated by three promoter GATA motifs.
4829	F08F1.4	F08F1.4	5.81181296629531	0.9275	0.159588755759844	0	None
17547	Y69A2AL.2	Y69A2AL.2	5.81029233088179	1.275	0.219438184413434	0	Y69A2AL.2 is an ortholog of members of the human Phospholipases family including PLA2G2F; Y69A2AL.2 is predicted to have calcium ion binding activity and phospholipase A2 activity, based on protein domain information.
3988	unc-129	C53D6.2	5.80946138659669	1.24	0.213444916401522	0	unc-129 encodes a member of the TGF-beta family of secreted growth factor signaling molecules; in C. elegans, UNC-129 functions as a guidance cue that is required for dorsalward axonal guidance as well as for proper migration of the distal tip cells of the somatic gonad; in regulating axon guidance and cell migration, UNC-129 functions by promoting UNC-5/UNC-40 signaling pathways at the expense o…
4512	clec-17	E03H4.10	5.80455565966812	3.3525	0.577563589112294	0	clec-17 is an ortholog of human CLEC3B (C-type lectin domain family 3, member B) and CLEC3A (C-type lectin domain family 3, member A).
17806	sfrp-1	Y73B6BL.21	5.80410685191158	1.5075	0.259729884108441	0	sfrp-1 is an ortholog of human SFRP1 (secreted frizzled-related protein 1), SFRP5 (secreted frizzled-related protein 5) and SFRP2 (secreted frizzled-related protein 2); sfrp-1 is expressed in all ventral cord neurons and the head muscle; sfrp-1 is localized to the nucleus.
16381	dpy-18	Y47D3B.10	5.80116171533399	0.7075	0.121958330885673	0	dpy-18 encodes a catalytic alpha subunit of collagen prolyl 4-hydroxylase (P4H) orthologous to human P4H alpha (I) isoform (OMIM: 176710), an alpha subunit of prolyl-4-hydroxylase which is a procollagen modifying enzyme required for exoskeleton formation, morphogenesis and maintenance of body shape; dpy-18 has a critical role in hydroxylation of cuticle collagens during collagen synthesis; dpy-18…
8709	dyf-1	F54C1.5	5.80075977054868	1.5575	0.268499310712307	0	dyf-1 encodes a ciliary protein, belonging to a conserved but unfamiliar protein family, specifically required for the kinesin OSM-3 to dock onto and move intraflagellar transport (IFT) particles; DYF-1 affects development of the amphid and phasmid neurons, chemotaxis, and dauer formation; DYF-1 function is downstream of BBS-8, which is required for IFT particles to stably bind both kinesin-II an…
3687	eya-1	C49A1.4	5.80070060319179	1.405	0.24221212162319	0	eya-1 encodes a protein orthologous to the Eyes absent/Eya Drosophila protein which is involved in eye development and has protein tyrosine phosphatase ; RNA interference and mutant studies indicate that eya-1 is involved in embryonic and larval tissue morphogenesis as well as larval viability; eya-1 mutants show increased embryonic cell deaths due to activation of the cell death pathway; eya-1 f…
409	B0416.7	B0416.7	5.79382755720958	1.175	0.20280203171354	0	Uncharacterized protein B0416.7
2504	let-653	C29E6.1	5.78892433275745	1.1025	0.190449889586801	0	let-653 encodes a mucin-like protein similar to the highly glycosylated mucins secreted by the apical surface of epithelia and believed to provide a protective barrier to exposed cellular surfaces; LET-653 is required for viability, locomotion, and for maintaining the tubular epithelial structure of the excretory cell canals.
12657	T06D8.10	T06D8.10	5.78829850689357	2.6975	0.466026414634182	0	T06D8.10 is predicted to have heme binding activity and peroxidase activity, based on protein domain information.
4454	E01G6.1	E01G6.1	5.7876207957657	3.32675	0.574804417461817	0	E01G6.1 is predicted to have chitin binding activity and serine-type endopeptidase inhibitor activity, based on protein domain information.
17996	Y79H2A.2	Y79H2A.2	5.78566903850082	1.13	0.195310169399666	0	None
1485	dhs-16	C10F3.2	5.78301739235636	1.9975	0.345407918475253	0	dhs-16 encodes a short-chain dehydrogenase predicted to be mitochondrial.
9542	F59E12.15	F59E12.15	5.7740193685012	0.7225	0.125129472883556	0	F59E12.15 is predicted to have ATP binding activity and protein kinase activity, based on protein domain information.
2595	C30G12.4	C30G12.4	5.76932798206143	1.9825	0.343627543132266	0	Uncharacterized protein C30G12.4
10706	grl-6	K10C2.5	5.76868588028421	1.615	0.279959774811041	0	grl-6 encodes a hedgehog-like protein, with an N-terminal signal sequence, a central proline-rich low-complexity region, and a C-terminal Ground-like (Grl) domain; GRL-6 is expressed in larval intestine, amphid socket cells, and neurons; the Grl domain is predicted to form a cysteine-crosslinked protein involved in intercellular signalling, and it has subtle similarity to the N-terminal Hedge dom…
14685	sma-5	W06B3.2	5.76322130879776	0.945	0.163970798511143	0	sma-5 encodes a serine/threonine kinase homologous to the mammalian MAP kinase MAPK7/ERK5 (OMIM:602521, required for development of extraembryonic vasculature and embryonic cardiovasculature); SMA-5 is required for normal body size morphogenesis, growth rates, and intestinal granule distribution, and for regulating the size of the intestine, body wall muscle, and hypodermis, as well as the number…
13547	T20D4.7	T20D4.7	5.75625603635095	1.205	0.20933745691477	0	T20D4.7 is an ortholog of human NXNL2 (nucleoredoxin-like 2).
16901	cutl-10	Y53H1B.1	5.75366437772511	1.27	0.220728898424578	0	None
10799	asah-1	K11D2.2	5.74861911112746	0.9025	0.156994224622232	0	K11D2.2 is orthologous to the human gene N-ACYLSPHINGOSINE AMIDOHYDROLASE (ASAH; OMIM:228000), which when mutated leads to Farber lipogranulomatosis.
10202	K04H4.2	K04H4.2	5.74111338569604	1.96	0.341397193945574	0	K04H4.2 encodes, by alternative splicing, three proteins ranging from 628 to 1446 residues in length; K04H4.2 proteins are predicted to be secreted, with an N-terminal chitin-binding peritrophin-A domain followed by up to 15 cysteine-rich domains; the general organization of K04H4.2 protein resembles that of T10E10.4; in mass RNAi assays, K04H4.2 is required for larval growth and locomotion; K04H…
7213	folt-2	F37B4.7	5.73657505879314	0.7575	0.132047431130338	0	folt-2 encodes a putative folate transporter; FOLT-2 is orthologous to the human folate transporters SLC19A1, SLC19A2, and SLC19A3 (Solute Carrier Family 19 (thiamine transporter), Member 1, 2 or 3); heterologously expressed FOLT-2 does not significantly transport folate; FOLT-2 does not seem to have any obvious function, perhaps because of genetic redundancy with its paralogs, FOLT-1 and FOLT-3.
2912	tag-241	C34E11.3	5.73640201733263	1.1725	0.204396413720181	0	tag-241 is an ortholog of human SOGA1 (suppressor of glucose, autophagy associated 1) and MTCL1 (microtubule crosslinking factor 1); tag-241 is involved in reproduction.
10720	K10C9.3	K10C9.3	5.73288611321309	0.945	0.164838439372095	0	K10C9.3 is an ortholog of human RNASET2 (ribonuclease T2); K10C9.3 is predicted to have RNA binding activity and ribonuclease T2 activity, based on protein domain information.
6753	F32B5.1	F32B5.1	5.72915542176197	0.7075	0.123491151472796	0	F32B5.1 is an ortholog of human CKB (creatine kinase, brain), CKMT2 (creatine kinase, mitochondrial 2 (sarcomeric)), CKM (creatine kinase, muscle) and CKMT1B (creatine kinase, mitochondrial 1B); F32B5.1 is involved in reproduction; F32B5.1 is predicted to have kinase activity, based on protein domain information.
14340	lec-10	W01A11.4	5.71440260858235	0.615	0.107622798414019	0	lec-10 encodes a galectin, a soluble galactose-binding lectin; recombinant lec-10 can bind to sugar in an in vitro assay.
6153	sqt-3	F23H12.4	5.71323239497996	1.4025	0.245482750050975	0	sqt-3 encodes a cuticle collagen; during development, sqt-3 activity is essential for viability and normal body morphology; genetic and expression studies indicate that SQT-3 is a cuticle component at all stages of development and that SQT-3 likely forms higher order cuticular structures with the DPY-17 cuticular collagen, both of which are candidate substrates for the DPY-31 procollagen C-protei…
4018	lam-2	C54D1.5	5.71277227391762	0.8125	0.142225168629524	0	lam-2 encodes a laminin gamma subunit; lam-2 activity is required for embryonic development and for regulation of muscle arm extension; loss of lam-2 function via large-scale RNAi screens results in embryonic, larval, and adult lethality, sterility, body morphology defects, and abnormal locomotion.
11229	M7.8	M7.8	5.71267808266566	0.76	0.133037428155827	0	None
14339	unc-83	W01A11.3	5.71225378112242	0.5875	0.102849071927011	0	unc-83 encodes a KASH domain-containing transmembrane protein; during development, UNC-83 is required for nuclear migrations in P cells, hyp7 hypodermal precursors, and intestinal cells and thus, for ventral nerve cord development, locomotion, and vulval formation; specifically, UNC-83 functions to recruit kinesin and dynein motor complexes to the nuclear envelope to regulate the directionality a…
12260	T02B5.3	T02B5.3	5.710609867954	1.56	0.273175726598693	0	T02B5.3 is an ortholog of human CEL (carboxyl ester lipase) and members of the CES (Carboxylesterases) family including CES4A.
18995	cuc-1	ZK652.11	5.70808775372244	0.6225	0.109055786606302	0	cuc-1 encodes a copper chaperone orthologous to Saccharomyces cerevisiae Atx1p and the vertebrate ATOX1 proteins; by homology, CUC-1 copper chaperone is predicted to function in the cytosol by transferring copper to the CUA-1 ATPase for transport into the post-Golgi compartment; when overexpressed in S. cerevisiae atx1 mutants, a cuc-1 cDNA is able to complement observed growth defects on iron-de…
8775	zig-7	F54D7.4	5.70249950416039	1.0675	0.187198613383689	0	zig-7 encodes a predicted secreted protein that is a member of the immunoglobulin superfamily of proteins; loss of zig-7 activity via RNAi has been reported to result in aldicarb resistance; a zig-7::gfp reporter fusion is expressed in body wall muscle.
17223	eps-8	Y57G11C.24	5.7020348270439	0.8625	0.151261790950362	0	eps-8 is encodes a cell signaling adaptor protein that contains and N-terminal PTB domain, and C-terminal SH3 and actin-binding domains; EPS-8 is essential for epidermal and intestinal cells morphogenesis; eps-8 is also involved in trafficking of the LET-23 EGF receptor during vulval development; EPS-8 physically interacts with the ankyrin repeat protein VAB-19 and demonstrates a novel actin barb…
19259	ceh-45	ZK993.1	5.69674321217742	0.965	0.169395032224237	0	ceh-45 encodes a homeodomain-containing protein; loss of ceh-45 activity via large-scale RNAi results in variable embryonic lethality.
14904	Y102A11A.2	Y102A11A.2	5.69657431256052	0.88	0.154478806334478	0	Y102A11A.2 is expressed in the nervous system, head, tail, reproductive system, intestine, rectal gland cell, and the body wall musculature.
18464	lim-4	ZC64.4	5.69573914307386	1.365	0.239652829195991	0	lim-4 encodes a LIM homeodomain protein homologous to murine Lhx6 and L3/Lhx7, and to Drosophila ARROWHEAD; LIM-4 is required for differentiation of AWB chemosensory neurons, for several but not all aspects of RID motor neuron differentiation, expression of ser-2, repulsion from chemosensory repellants, SAA neurite outgrowth, and normal locomotion and head foraging; lim-4 is expressed in AWB, RID…
10016	K02E7.5	K02E7.5	5.69408033825906	3.13	0.549693684328484	0	None
10795	K11D12.7	K11D12.7	5.69222224912467	0.9475	0.166455201243364	0	K11D12.7 is predicted to have serine-type endopeptidase inhibitor activity, based on protein domain information.
712	tsp-17	C02F12.1	5.69004631876391	0.84	0.14762621478668	0	tsp-17 is an ortholog of human TSPAN32 (tetraspanin 32), TSPAN2 (tetraspanin 2) and CD9 (CD9 molecule); tsp-17 exhibits D2 dopamine receptor binding activity; tsp-17 is localized to the axon, the dendrite, the perinuclear region of cytoplasm and the plasma membrane.
4807	sto-1	F08C6.4	5.68819954633712	1.2175	0.214039607802438	0	sto-1 is an ortholog of human NPHS2 (nephrosis 2, idiopathic, steroid-resistant (podocin)); sto-1 is expressed in the pharynx and the nervous system.
7325	nas-39	F38E9.2	5.68239011753977	0.5925	0.104269504160078	0	nas-39 encodes an astacin family zinc metalloprotease and the only BMP-1/Tolloid homolog in C. elegans; in Drosophila and vertebrates nas-39 homologues activate TGF-beta signals by cleaving chordin/SOG, an inhibitor keeping the TGF-beta in inactive form; however developmental processes known to be affected by TGF-beta signaling are unaffected in nas-39 mutants, suggesting that nas-39 is not requi…
7378	F39G3.2	F39G3.2	5.68176533433946	1.0075	0.177321649296368	0	None
6532	F28G4.4	F28G4.4	5.68161812106455	2.025	0.356412549532734	0	None
5090	pqn-29	F10F2.9	5.6804371902661	1.7825	0.313796269599541	0	The protein product of this gene is predicted to contain a glutamine/asparagine (Q/N)-rich ('prion') domain, by the algorithm of Michelitsch and Weissman (as of the WS77 release of WormBase, i.e., in wormpep77).
5835	iglr-1	F20D1.7	5.68010596702534	1.5225	0.268040774034596	0	iglr-1 is expressed in the ventral nerve cord and the head neurons.
4663	asb-2	F02E8.1	5.6747030599144	0.4975	0.0876697854931469	0	asb-2 encodes the B subunit of the membrane-bound F0 proton channel portion of ATP synthase (mitochondrial respiratory chain [MRC] complex V) that is closely similar to its paralog ASB-1; RNAi experiments indicate that asb-2 activity is required for larval development as well as for normal body morphology, lifespan, and growth rate.
12122	R74.2	R74.2	5.67262600102282	2.9025	0.511667788335888	0	None
13745	lbp-7	T22G5.2	5.67001809031927	1.6325	0.28791795264062	0	lbp-7 encodes a predicted intracellular fatty acid binding protein (iFABP) that is most similar to the vertebrate muscle and heart FABPs; by homology, LBP-7 is predicted to function as an intracellular transporter for small hydrophobic molecules such as lipids and steroid hormones; as loss of lbp-7 activity via large-scale RNAi screens does not result in any obvious abnormalities, the precise rol…
5044	F10D2.10	F10D2.10	5.66429823260316	1.6375	0.289091416580911	0	F10D2.10 is an ortholog of human ABHD14B (abhydrolase domain containing 14B).
18285	cyn-17	ZC250.1	5.66194459796117	3.125	0.55193051537899	0	None
18231	cln-3.3	ZC190.1	5.65946606542644	1.39	0.245606208064658	0	cln-3.3 encodes a predicted transmembrane protein that comprises one of three C. elegans homologs of human CLN3, (OMIM:607042, mutations are associated with Batten disease (also known as juvenile neuronal ceroid lipofuscinosis), a recessively inherited childhood neurodegenerative lysosomal storage disease); as loss of cln-3.3 via large-scale RNAi screens results in no obvious abnormalities, the p…
11555	lec-8	R07B1.10	5.65915972197431	1.12	0.197909240068111	0	lec-8 encodes a glycolipid-binding galectin; LEC-8 binds glycolipids and can inhibit Bacillus thuringiensis Cry5B from binding glycolipids; lec-8 mutants are more susceptible to Cry5B; lec-8 is expressed in the pharyngeal-intestinal valve, the intestinal-rectal valve, and in some vesicles of the intestine; lec-8 expression in the intestine is induced in response to bacterial infection and Cry5B, …
3282	ahr-1	C41G7.5	5.65832914510953	1.22	0.215611352523464	0	ahr-1 encodes an aryl hydrocarbon receptor (ligand-activated basic helix-loop-helix transcription factor) ortholog that biochemically resembles its vertebrate relatives (OMIM:600253) which mediate the carcinogenic and teratogenic effects of environmental toxins; AHR-1 activity is required for specification of RMEL and RMER GABAergic neuron cell fate and negative regulation of spontaneous movement…
11397	ugt-47	R04B5.9	5.65451036172849	0.9675	0.171102348056225	0	ugt-47 is predicted to have transferase activity, transferring hexosyl groups, based on protein domain information.
4239	D1025.1	D1025.1	5.65277291035731	0.5275	0.0933170336691727	0	None
4154	C56C10.4	C56C10.4	5.64907582518846	3.35	0.593017354283475	0	C56C10.4 is an ortholog of human FAM46C (family with sequence similarity 46, member C), FAM46D (family with sequence similarity 46, member D), FAM46B (family with sequence similarity 46, member B) and FAM46A (family with sequence similarity 46, member A).
3076	irx-1	C36F7.1	5.64713028142765	1.0975	0.194346499072187	0	irx-1 encodes a homeodomain-containing protein that is most similar to members of the Iroquois subclass of TALE (three amino acid loop extension) superclass atypical homeodomain proteins; IRX-1 functions downstream of the UNC-55 nuclear receptor in a transcriptional regulatory network that controls remodeling of the GABAergic DD neuron synapses during larval development.
13349	pqn-68	T16G1.10	5.64562154959279	0.74	0.131075027523475	0	The protein product of this gene was predicted to contain a glutamine/asparagine (Q/N)-rich ('prion') domain, by the algorithm of Michelitsch and Weissman (as of the WS72 release of WormBase, i.e., in wormpep77).
18300	ZC302.3	ZC302.3	5.64431593154887	1.344375	0.238182096166096	0	None
8568	frpr-9	F53B7.2	5.64352578657328	1.0775	0.190926743448842	0	F53B7.2 encodes a homolog of the functionally active Fmrf Receptor (FR; CG2114) of D. melanogaster; it is thus possible that F53B7.2 is a receptor for one of the FMRF-like neurotransmitters in C. elegans (e.g., FLP-1 through FLP-12).
3390	C44B7.5	C44B7.5	5.63816258225221	0.835	0.148097893208757	0	Uncharacterized protein C44B7.5
13709	cutl-12	T22C8.7	5.63519350003217	0.9475	0.168139745333428	0	None
11826	R10E4.6	R10E4.6	5.63464694953617	1.1775	0.208974938544629	0	R10E4.6 is involved in reproduction.
4984	F09F9.4	F09F9.4	5.63282153575607	1.0425	0.185075986054664	0	F09F9.4 is an ortholog of human ISM1 (isthmin 1, angiogenesis inhibitor); F09F9.4 is involved in embryo development, hermaphrodite genitalia development, locomotion, nematode larval development and reproduction.
9817	lin-33	H32C10.2	5.63202285796411	1.15	0.204189512188114	0	lin-33 encodes a novel protein; animals carrying a gain-of-function lin-33 mutation exhibit defects in vulval development such that some Pn.p cells that normally make up the vulva undergo inappropriate cytotoxic cell death while others adopt inappropriate cell fates; the cytotoxic cell death seen in lin-33 mutant animals is dependent upon lin-24 and a number of programmed cell death genes, includ…
368	fbxa-139	B0391.9	5.63018115281024	1.075	0.190935241837365	0	None
10447	K08B4.2	K08B4.2	5.62854734601543	3.745	0.6653581767685	0	None
7027	mab-21	F35G12.6	5.62522692685369	0.6225	0.110662202271043	0	mab-21 encodes a novel protein that is a member of a highly conserved family of proteins with Drosophila and vertebrate orthologs; MAB-21 is cell-autonomously required for specifying the identity of sensory ray 6 in the male tail, and also for backward locomotion, normal body morphology, fecundity, and embryonic morphogenesis; MAB-21 expression begins in embryonic hypodermal cells and continues i…
15043	Y106G6D.8	Y106G6D.8	5.62485972437396	0.8125	0.144448046673809	0	None
224	tbb-4	B0272.1	5.62143918265693	0.585	0.104065877258767	0	tbb-4 is an ortholog of members of the human TUB (Tubulins) family including TUBB3; tbb-4 is involved in chemotaxis, embryo development and mitotic nuclear division; tbb-4 is predicted to have GTP binding activity, GTPase activity, and is a structural constituent of cytoskeleton, based on protein domain information; tbb-4 is expressed in certain amphid neurons, certain motor neurons, certain sens…
3600	C47D12.5	C47D12.5	5.61442719509165	0.565	0.100633596334448	0	None
4576	fut-2	EGAP9.2	5.60679577733951	2.0325	0.362506515435175	0	fut-2 encodes a unique alpha 1,2-fucosyltransferase specifically expressed in intestinal cells of larval and adult animals; recombinant FUT-2 expressed in human 293T cells exhibits a novel acceptor specificity profile compared with mammalian alpha 1,2-fucosyltransferases and the predicted protein shares very low amino acid identity with human alpha 1,2-fucosyltransferases, but its predicted type …
11291	R01H2.8	R01H2.8	5.60383255045261	0.8675	0.154804768377659	0	None
8531	F53A9.1	F53A9.1	5.60283892077862	0.6	0.107088568578127	0	F53A9.1 is expressed in the intestine.
11866	R11A5.3	R11A5.3	5.60262011168278	1.6625	0.296736163948238	0	None
8253	F48E3.4	F48E3.4	5.60147486062555	0.9625	0.171829745548927	0	F48E3.4 is an ortholog of human PRSS45 (protease, serine, 45), GZMK (granzyme K (granzyme 3; tryptase II)) and GZMA (granzyme A (granzyme 1, cytotoxic T-lymphocyte-associated serine esterase 3)); F48E3.4 is predicted to have serine-type endopeptidase activity, based on protein domain information.
18877	ced-11	ZK512.3	5.60044443978454	1.4725	0.262925561682145	0	The ced-11 gene encodes a predicted transmembrane ion channel related to the long transient receptor potential channel (LTRPC) subfamily of TRP channels found in Drosophila and mammals; CED-11 functions as a downstream effector in the programmed cell death pathway and may play a role in affecting the morphological changes seen in the nucleus, cytoplasm, and plasma membrane of apoptotic cells.
9056	glb-19	F56C4.3	5.59948974388963	0.815	0.145548976295449	0	glb-19 encodes a globin.
754	abu-8	C03A7.14	5.59826206569084	3.8	0.678782085477641	0	abu-8 encodes a transmembrane protein with a predicted signal sequence, a glutamine/asparagine-rich domain and multiple cysteine-rich repeats (DUF139); abu-8 expression is induced by blockage of the unfolded-protein response in the endoplasmic reticulum, and ABU-8 may help protect the organism from damage by improperly folded nascent protein.
16639	linc-11	Y49F6C.11	5.59626754916047	1.0175	0.181817611660229	0	C. elegans lincRNA gene
11398	cyp-14A4	R04D3.1	5.58745314645367	1.8575	0.332441266407566	0	cyp-14A4 encodes one of ~80 C. elegans cytochrome P450s: membrane-associated, heme-containing NADPH-dependent monooxygenases that catalyze the oxidative metabolism of a variety of exogenous compounds and endogenous substrates.
6311	F26D11.6	F26D11.6	5.58615282893773	0.7875	0.140973586673201	0	None
17111	cutl-26	Y55F3C.7	5.58512212994256	1.3975	0.250218342139346	0	None
7829	magu-4	F44D12.1	5.57058534001024	0.9225	0.165601986809936	0	magu-4 is an ortholog of human DLG5 (discs, large 5 (Drosophila)); magu-4 is expressed in the pharynx, spermatheca, hypodermis, nervous system, vulC, and the vulD.
4041	C54E10.6	C54E10.6	5.56804916578687	1.5125	0.271639124398115	0	None
13661	hlb-1	T21H8.1	5.5672527898601	0.6675	0.119897555436274	0	hlb-1 encodes the C. elegans ortholog of human beta-liprin, a coiled-coil domain-containing protein that interacts with alpha-liprin, a transmembrane protein-tyrosine phosphatase-interacting protein; hlb-1 functions cell non-autonomously in the organization and proper function of neuromuscular junctions and hence, is also required for wild type locomotory behavior; an hlb-1 reporter fusion constr…
10187	K04G2.11	K04G2.11	5.5671837504177	0.795	0.142801106563144	0	scbp-2 gene encodes the C. elegans SECIS-binding protein 2; SCBP-2 binds selenoproteins mRNA allowing selenocysteine (Sec) to be incorporated to the growing polypeptide chain instead of ending the protein translation; strains carrying scbp-2 mutations are unable to incorporate Sec; SCBP-2 contains an L7Ae domain; SCBP-2 translation initiates at a non-AUG codon.
9982	K02D7.1	K02D7.1	5.56610177840031	0.8475	0.152260959957432	0	K02D7.1 is orthologous to the human gene PURINE NUCLEOSIDE PHOSPHORYLASE (NP; OMIM:164050), which when mutated leads to disease.
2775	twk-26	C33D12.3	5.56504997304357	1.1825	0.212486860985595	0	twk-26 is an ortholog of human KCNK10 (potassium channel, two pore domain subfamily K, member 10) and members of the Potassium channels, two pore domain sub K family including KCNK4; twk-26 is involved in embryo development; twk-26 is predicted to have potassium channel activity, based on protein domain information.
3674	spp-15	C48E7.10	5.56453919434626	0.8275	0.148709528515994	0	None
18801	ZK381.2	ZK381.2	5.55705878293822	1.91	0.343706999440829	0	UPF0392 protein ZK381.2
16048	Y41D4B.14	Y41D4B.14	5.55666622039769	1.2375	0.222705476794219	0	None
11954	R12E2.14	R12E2.14	5.5557060608913	4.1725	0.751029653885362	0	None
1205	C07E3.9	C07E3.9	5.55368445758402	1.0775	0.194015343908958	0	C07E3.9 is an ortholog of members of the human Phospholipases family including PLA2G2F; C07E3.9 is predicted to have calcium ion binding activity and phospholipase A2 activity, based on protein domain information.
10664	K09G1.1	K09G1.1	5.55316701358916	0.5975	0.107596259672698	0	K09G1.1 is an ortholog of human MAL (mal, T-cell differentiation protein), MALL (mal, T-cell differentiation protein-like), MARVELD1 (MARVEL domain containing 1), PLLP (plasmolipin), PLP2 (proteolipid protein 2 (colonic epithelium-enriched)) and CKLF (chemokine-like factor) and members of the CMTM (CKLF-like MARVEL transmembrane domain containing) family including CMTM8.
15263	pes-4	Y119D3B.17	5.5519246535022	1.105	0.199030078569773	0	pes-4 encodes a protein that contains two type 1 KH domains, RNA-binding domains that are present in a diverse group of nucleic acid-binding proteins; pes-4 was identified in promoter-trapping screens and by homology, is predicted to function as an RNA-binding protein; however, the precise role of PES-4 in C. elegans development and/or behavior is not yet known; a pes-4 reporter is expressed in t…
688	tyr-1	C02C2.1	5.55049171565511	1.48	0.266643042782259	0	C02C2.1 encodes a tyrosinase homolog with a glutamine/asparagine-rich domain.
10048	aqp-8	K02G10.7	5.54854154700544	1.965	0.354147118364918	0	aqp-8 encodes, by alternative splicing, two isoforms of a putative aquaglyceroporin with no known substrate, since AQP-8 expressed in Xenopus oocytes has no effect on water, glycerol, or urea permeability; loss of AQP-8 activity via mutation or RNAi results in no obvious defects; however, AQP-8, in conjunction with AQP-2, AQP-3, and AQP-4, is weakly required for recovery from hypotonic stress; AQ…
1933	C17G1.2	C17G1.2	5.54585510213082	0.61	0.109992055105375	0	None
13928	T24D3.2	T24D3.2	5.5370244244756	1.4525	0.262325012253772	0	None
9403	del-2	F58G6.6	5.53514330376544	1.4725	0.266027439433825	0	del-2 encodes an unfamiliar protein whose promoter drives expression in IL1, ASH, and OLQ.
18020	ceh-51	Y80D3A.3	5.53257065555419	1.885	0.340709611743979	0	ceh-51 encodes a homeodomain transcription factor most closely related to those of NK-2 subfamily proteins containing multiple serine residues in the N-terminus; ceh-51 is expressed in the early MS lineage downstream of TBX-35; TBX-35 directly activates ceh-51 and TBX-35 is sufficient, but not necessary, for ceh-51 activation; activation of ceh-51 in a tbx-35 mutant background is POP-1-dependent;…
825	clec-10	C03H5.1	5.5302504284241	1.2575	0.227385724439668	0	clec-10 is an ortholog of human CLEC3B (C-type lectin domain family 3, member B) and CLEC3A (C-type lectin domain family 3, member A).
3779	C50B8.4	C50B8.4	5.52963681353527	1.37	0.247755873703415	0	C50B8.4 is involved in embryo development.
17687	lin-17	Y71F9B.5	5.51994627311242	0.8075	0.146287655721093	0	lin-17 encodes one of four C. elegans Frizzled homologs, integral membrane proteins that contain an external cysteine rich domain (CRD) and seven transmembrane domains and that function in a wide variety of species as receptors for Wnt glycoprotein signaling molecules; LIN-17 activity is required for specifying the polarity of a number of asymmetric cell divisions that, in C. elegans, are essenti…
6950	F35C5.12	F35C5.12	5.51561573848569	0.55	0.0997168813197641	0	None
4204	D1007.13	D1007.13	5.51299441901387	1.5975	0.289769928750581	0	None
6196	gtr-1	F25E2.1	5.50905311207542	0.88	0.159737069528538	0	gtr-1 is an ortholog of members of the human EDNR (Endothelin receptors) family including EDNRB, G protein-coupled receptors, Class A orphans family including GPR37 and Bombesin receptors family including NMBR; gtr-1 is expressed in certain interneurons, certain amphid neurons, ventral nerve cord, chemosensory neurons, head neurons, and the tail neurons.
14852	W09G12.7	W09G12.7	5.50765242887375	2.735	0.496581807824659	0	None
10996	M02D8.6	M02D8.6	5.49850768509341	0.8775	0.159588755759845	0	None
4838	rhr-1	F08F3.3	5.49770164593751	0.76	0.138239586093508	0	rhr-1 encodes an ortholog of human Rhesus blood-group associated glycoprotein (RHAG; OMIM:180297, mutated in chronic hemolytic anemia), a member of the ammonium transporter family, and affects general levels of mRNA transcripts, and embryonic viability in a large-scale RNAi screen.
10463	col-65	K08C9.4	5.49643787137205	1.8725	0.340675187061212	0	col-65 is an ortholog of human SFTPD (surfactant protein D); col-65 is a structural constituent of cuticle, based on protein domain information.
476	B0507.1	B0507.1	5.4954947245158	1.49	0.271131185578798	0	B0507.1 is expressed in the gon_herm_dtc_P, gon_herm_dtc_A, spermatheca, pharyngeal-intestinal valve, pharyngeal gland cell, and the rectal gland cell.
14582	cutl-13	W04C9.3	5.49285204932411	1.28	0.233030125061807	0	cutl-13 is involved in nematode larval development.
223	B0261.8	B0261.8	5.49248924407339	1.0875	0.197997656740694	0	None
2088	ift-74	C18H9.8	5.49081839912524	1.4425	0.262711292770092	0	ift-74 encodes a protein that interacts with the intraflagellar transport (IFT) component IFT-81; ift-74 along with ift-81 is involved in growth, chemotaxis, intraflagellar transport and the morphogenesis of cilia; ift-74 colocalizes with ift-81 in the ciliary transition zone; ift-74 binds ift-81 in protien binding assays; the physical interaction of ift-74 and ift-81 and their co-localization in…
9355	F58E6.13	F58E6.13	5.49045009458126	3.695	0.672986719913316	0	F58E6.13 is an ortholog of human CLEC14A (C-type lectin domain family 14, member A) and FBLN7 (fibulin 7) and members of the CD (CD molecules) family including CD248.
337	unc-44	B0350.2	5.48410091886472	0.53	0.0966430063635147	0	The unc-44 gene encodes an ankyrin-like protein required for proper sex myoblast and axonal guidance during development.
7862	vet-6	F44F1.7	5.47843843877916	2.205	0.402486954018118	0	vet-6 encodes a protein that contains a spectrin repeat; vet-6 is preferentially transcribed in embryos prior to gastrulation.
11218	M60.4	M60.4	5.47783282693184	1.355	0.247360597303759	0	M60.4 is an ortholog of human MAL (mal, T-cell differentiation protein), MALL (mal, T-cell differentiation protein-like), MARVELD1 (MARVEL domain containing 1), PLLP (plasmolipin), PLP2 (proteolipid protein 2 (colonic epithelium-enriched)) and CKLF (chemokine-like factor) and members of the CMTM (CKLF-like MARVEL transmembrane domain containing) family including CMTM8.
3743	C49G7.3	C49G7.3	5.47565935583526	0.7675	0.140165768197778	0	None
2187	C24H11.1	C24H11.1	5.47183399270549	0.58	0.105997367751507	0	C24H11.1 is an ortholog of human PPP1CB (protein phosphatase 1, catalytic subunit, beta isozyme); C24H11.1 is predicted to have hydrolase activity, based on protein domain information.
9875	K01A12.4	K01A12.4	5.46783270510576	0.965	0.176486745671443	0	None
10711	zig-1	K10C3.3	5.46519464054914	0.8975	0.164221049574516	0	zig-1 encodes a predicted transmembrane protein that is a member of the immunoglobulin superfamily of proteins; a zig-1::gfp reporter fusion is expressed in most neurons, including the PVT interneuron, as well as in body wall muscle; zig-1::gfp expression begins during the L1 larval stage of development.
10687	K10B2.2	K10B2.2	5.46440765510511	1.0125	0.185289982721929	0	ctsa-1 is an ortholog of human CTSA (cathepsin A); ctsa-1 is predicted to have serine-type carboxypeptidase activity, based on protein domain information.
7926	F45E1.1	F45E1.1	5.46329435662904	1.3625	0.249391651091758	0	None
19198	sdz-38	ZK892.7	5.45881721874372	1.165	0.213416194995463	0	sdz-38 is involved in embryo development; sdz-38 is expressed in the MSp, MSa, MSpa, MSpp, MSaa, and the MSap.
18763	tbx-7	ZK328.8	5.44921991173895	2.2825	0.418867294212689	0	tbx-7 encodes one of 21 C. elegans T-box transcription factors; in large-scale RNAi screens for early embryonic defects, loss of tbx-7 activity results in no obvious abnormalities; thus, the precise role of tbx-7 in C. elegans development and/or behavior is not yet known.
19003	ZK662.2	ZK662.2	5.44919678062208	1.885	0.345922541594251	0	None
12254	T02B11.6	T02B11.6	5.44099120476508	0.8125	0.149329408819561	0	T02B11.6 is an ortholog of members of the human SLC (Solute carriers) family including SLC37A1.
14458	W02D9.6	W02D9.6	5.43903186452806	1.5775	0.290033233724561	0	None
7562	F41E6.15	F41E6.15	5.42977036366661	0.92	0.169436263116428	0	None
11359	eef-1A.2	R03G5.1	5.42428125790388	0.56	0.10323948434348	0	eef-1A.2 encodes a translation elongation factor 1-alpha homolog that is required for embryonic viability, fertility, and a normal postembryonic growth rate; eef-1A.2 encodes at least one alternatively spliced coding sequence identical to that of eef-1A.1.
18067	Y82E9BR.23	Y82E9BR.23	5.41904667711037	2.075	0.38290867815637	0	Y82E9BR.23 is an ortholog of human ALS2CR12 (amyotrophic lateral sclerosis 2 (juvenile) chromosome region, candidate 12).
15755	ptr-18	Y38F1A.3	5.41826944637261	2.3825	0.439716042840029	0	ptr-18 encodes a nematode-specific member of the sterol sensing domain (SSD) proteins, distantly paralogous to Drosophila PATCHED (PTC) and human PTCH (OMIM:601309, mutated in basal cell nevus syndrome); PTR-18 is strongly required for normal molting from L3 to adult stage (a role conserved in C. briggsae); PTR-18 is also required for male tail development and vulval morphogenesis, and (partly) f…
14368	W01C9.1	W01C9.1	5.41738645813176	2.135	0.394101476145432	0	None
5735	pab-2	F18H3.3	5.41279499311814	0.7	0.129323205643292	0	pab-2 encodes a polyadenylate-binding protein 1 homolog with high similarity to human PABP 1.
9992	K02E10.6	K02E10.6	5.41060945276295	0.6325	0.116899954713422	0	None
716	C02F12.5	C02F12.5	5.40913375172053	0.9525	0.176091042248129	0	C02F12.5 encodes a putatively secreted protein with a Kunitz/bovine pancreatic trypsin inhibitor domain; C02F12.5 has no obvious function in mass RNAi assays.
8043	col-174	F46C8.2	5.40652662109072	2.1325	0.394430685253851	0	col-174 is an ortholog of human MARCO (macrophage receptor with collagenous structure); col-174 is a structural constituent of cuticle, based on protein domain information.
9674	H10E21.4	H10E21.4	5.40544570541638	3.9825	0.736757007106638	0	H10E21.4 is predicted to have calcium ion binding activity, based on protein domain information.
2819	nhr-163	C33G8.12	5.40154898647383	0.9725	0.180040947964235	0	nhr-163 is predicted to have sequence-specific DNA binding activity, transcription factor activity, sequence-specific DNA binding, and zinc ion binding activity, based on protein domain information.
4998	F09G8.5	F09G8.5	5.40136827163409	1.63	0.301775386907079	0	F09G8.5 is an ortholog of human C21orf2 (chromosome 21 open reading frame 2).
9514	F59D6.1	F59D6.1	5.40118893229152	1.195	0.221247583630259	0	non-coding Transcript Isoform
6374	F26G1.9	F26G1.9	5.39774076023651	1.2925	0.23945203325092	0	F26G1.9 is an ortholog of human FAM46C (family with sequence similarity 46, member C), FAM46D (family with sequence similarity 46, member D), FAM46B (family with sequence similarity 46, member B) and FAM46A (family with sequence similarity 46, member A).
14480	W02H5.8	W02H5.8	5.39686078471833	0.51	0.0944993803516496	0	W02H5.8 is an ortholog of human DAK; W02H5.8 is predicted to have ATP binding activity and glycerone kinase activity, based on protein domain information; W02H5.8 is expressed in the intestine.
18401	fkb-4	ZC455.10	5.39076826052848	1.8775	0.348280599213876	0	fkb-4 encodes a peptidylprolyl cis/trans isomerase homologous to mammalian FK506 immunosuppressant-binding protein 9; FKB-4 expression is positively regulated by signaling through the DAF-2 insulin receptor-like pathway and in part, through the activity of the DAF-16 fork-head transcription factor suggesting that FKB-4 could play a role in metabolism and longevity; as loss of FKB-4 function via R…
1468	C10C5.5	C10C5.5	5.38751776320737	1.2225	0.226913404972646	0	C10C5.5 is an ortholog of human ACY1 (aminoacylase 1); C10C5.5 is predicted to have aminoacylase activity, based on protein domain information.
7660	F42C5.9	F42C5.9	5.38449629837225	0.7	0.130002875145743	0	F42C5.9 is involved in nematode larval development, receptor-mediated endocytosis, reproduction and striated muscle myosin thick filament assembly; F42C5.9 is localized to the plasma membrane and the striated muscle dense body.
11214	ifc-2	M6.1	5.38367535300972	0.39	0.0724412180206914	0	ifc-2 encodes three isoforms of an intermediate filament protein dispensable for viability but required for normal movement, growth rate, body size, body shape, and cuticle strength; IFC-2 is present in the cytoplasm of intestinal cells, and at the desmosomes of intestinal and pharyngeal cells.
13240	nhr-218	T13F3.2	5.38273421182603	1.66	0.308393454826904	0	nhr-218 is predicted to have sequence-specific DNA binding activity, transcription factor activity, sequence-specific DNA binding, and zinc ion binding activity, based on protein domain information.
10521	K08E7.6	K08E7.6	5.37795226561144	1.6775	0.311921697543977	0	None
1894	unc-75	C17D12.2	5.37749884557294	1.43857142857143	0.267516827038604	0	unc-75 encodes an RNA-binding protein with two N-terminal RNA recognition motifs (RRMs), a glutamine/asparagine-rich linker domain, and a third C-terminal RRM that is orthologous to the mammalian CELF/BrunoL proteins that control pre-mRNA splicing; UNC-75 is required for neuron-specific splicing of unc-32 mRNA; UNC-75 binds the unc-32 intron 7a in vitro; both UNC-75 and EXC-7 are required in para…
6997	F35E2.8	F35E2.8	5.37329449623355	1.645	0.306143651935154	0	This gene encodes a protein containing an F-box, a motif predicted to mediate protein-protein interactions either with homologs of yeast Skp-1p or with other proteins.
7496	fkh-8	F40H3.4	5.37194930054492	0.5525	0.102849071927011	0	fkh-8 encodes one of 15 C. elegans forkhead transcription factors; loss of fkh-8 activity via RNAi has been reported to result in either no defects or a weakly penetrant aldicarb resistance phenotype; an FKH-8 reporter fusion is expressed in nerve cells in the head and tail ganglia of both males and hermaphrodites with expression beginning in the later stages of embryogenesis and continuing throu…
9795	nhr-97	H27C11.1	5.37024624313708	0.4975	0.0926400722566086	0	nhr-97 is an ortholog of human NR5A1 (nuclear receptor 5A1) and NR5A2 (nuclear receptor 5A2); nhr-97 is involved in reproduction; nhr-97 is predicted to have sequence-specific DNA binding activity, steroid hormone receptor activity, transcription factor activity, sequence-specific DNA binding, and zinc ion binding activity, based on protein domain information.
12429	mlp-1	T04C9.4	5.36977806643556	0.815	0.151775360157667	0	mlp-1 encodes a LIM domain-containing protein that is a member of the MLP/CRP family of muscle LIM domain proteins.
12275	T02D1.8	T02D1.8	5.36964172328534	0.8525	0.158762920122427	0	None
19021	ZK669.3	ZK669.3	5.36582693262509	0.93	0.173319045074945	0	ZK669.3 is an ortholog of human IFI30 (interferon, gamma-inducible protein 30).
9777	H24G06.1	H24G06.1	5.36519117164574	1.2375	0.230653477277755	0	H24G06.1 is an ortholog of human KIAA1875 (KIAA1875) and members of the WDR (WD repeat domain containing) family including WDR62; H24G06.1 is involved in body morphogenesis, embryo development, hermaphrodite genitalia development and reproduction.
5142	F11A5.6	F11A5.6	5.3591906572661	0.4675	0.0872333212042296	0	None
17180	Y57A10C.11	Y57A10C.11	5.35806263321509	1.2725	0.237492557871881	0	None
11103	M05B5.2	M05B5.2	5.35557853126369	1.62	0.302488328859916	0	let-522 is involved in determination of adult lifespan, growth, locomotion, nematode larval development, positive regulation of growth and reproduction; let-522 is expressed in the pharynx.
4836	F08F3.10	F08F3.10	5.35482571440653	1.2675	0.236702381664811	0	None
17905	lgc-27	Y74E4A.1	5.35413321377176	1.69	0.315643995493617	0	lgc-27 is an ortholog of human ZACN (zinc activated ligand-gated ion channel) and members of the Cholinergic receptors, nicotinic family including CHRNG and 5-hydroxytryptamine (serotonin) receptors, ionotropic family including HTR3B; lgc-27 is predicted to have extracellular ligand-gated ion channel activity, based on protein domain information; lgc-27 is expressed in certain interneurons.
8141	F47B8.10	F47B8.10	5.35300711610774	0.505	0.0943394972295859	0	F47B8.10 is orthologous to the human gene GLUCOSE-6-PHOSPHATE TRANSPORTER 1 (G6PT1; OMIM:602671), which when mutated leads to type Ib glycogen storage disease.
11970	skr-20	R12H7.5	5.35243700676145	0.6125	0.11443385493865	0	The skr-20 gene encodes a homolog of Skp1 in S. cerevisiae that has no known function in vivo, since skr-20(RNAi) animals are at least superficially normal.
7424	slt-1	F40E10.4	5.35063694105509	1.8675	0.349023867732605	0	slt-1 encodes the sole C. elegans homolog of Drosophila Split, a secreted extracellular protein containing leucine-rich and EGF-like repeats that functions as a ligand for the Robo receptor; during C. elegans larval development, slt-1 acts via the SAX-3/Robo receptor, and in parallel with UNC-6/Netrin, to direct ventral axon guidance and guidance at the midline; during embryonic development, slt-…
210	dhcr-7	B0250.9	5.34738591923683	0.5875	0.109866766467427	0	dhcr-7 encodes a protein orthologous to the human 7-DEHYDROCHOLESTEROL REDUCTASE (DHCR7; OMIM:602858), which when mutated leads to disease.
3851	C50F4.9	C50F4.9	5.34642205860888	1.005	0.187976180889374	0	C50F4.9 is involved in innate immune response.
5024	ifb-1	F10C1.2	5.34554005950903	0.8075	0.151060508575473	0	ifb-1 (also known as vab-21) encodes two isoforms of an essential intermediate filament protein that is coexpressed with the essential IF proteins IFA-1, IFA-2, and IFA-3, along with IFA-4; IFB-1 is required for embryonic development and epidermal morphogenesis; IFB-1 forms heteropolymeric intermediate filaments in vitro with an equimolar mixture of IFA-1, IFA-2, or IFA-3, and binds IFA-4 in blot…
12456	trap-2	T04G9.5	5.33874081165889	0.6375	0.119410179757708	0	trap-2 is an ortholog of human SSR2 (signal sequence receptor, beta (translocon-associated protein beta)); trap-2 is involved in embryo development; trap-2 is expressed in several tissues including the pharynx.
6798	clec-180	F32E10.3	5.33578475044987	1.31	0.245512152620016	0	C-type lectin domain-containing protein 180
9639	H06A10.1	H06A10.1	5.3342093900155	1.4025	0.262925561682146	0	None
7158	msp-19	F36H12.7	5.33250196320666	0.6	0.112517539447692	0	msp-19 encodes a protein that belongs to a family of proteins called the Major Sperm Proteins (MSPs) that is conserved in nematodes; msp-19 has a homolog in C. briggsae as predicted by the Wobble Aware Bulk Aligner (WABA); the msp gene family consists of closely related, small, basic proteins that make up 15% of sperm protein; this multigene family consists of over fifty genes, including many pse…
5768	F19C7.2	F19C7.2	5.33151114019101	0.635	0.119103192941514	0	F19C7.2 is an ortholog of human PRSS16 (protease, serine, 16 (thymus)); F19C7.2 is predicted to have serine-type peptidase activity, based on protein domain information.
8248	hlh-13	F48D6.3	5.32762720515717	1.31	0.245888075414119	0	hlh-13 is an ortholog of human FERD3L (Fer3-like bHLH transcription factor); hlh-13 is involved in embryo development, locomotion, nematode larval development and response to oxidative stress; hlh-13 is predicted to have protein dimerization activity, based on protein domain information; hlh-13 is expressed in all ventral cord neurons, tail neurons, and certain mechanosensory neurons.
16969	Y54F10AM.6	Y54F10AM.6	5.32045193515545	1.27	0.238701526764736	0	None
11028	gei-15	M03A8.4	5.31658212154531	0.74	0.139187166318972	0	gei-15 is involved in determination of adult lifespan; gei-15 is localized to the cell junction and the striated muscle dense body.
19129	ZK816.1	ZK816.1	5.31371627230154	0.665	0.125147818574055	0	None
4281	D1054.9	D1054.9	5.31348668929135	2.14	0.402748726991807	0	None
13111	T11F9.12	T11F9.12	5.30712367822178	1.1175	0.210566036850762	0	None
7528	F41C3.11	F41C3.11	5.30414482461465	0.8575	0.16166602314866	0	None
12348	T03F1.6	T03F1.6	5.29545490405575	0.5775	0.109055786606302	0	None
1780	C15H9.9	C15H9.9	5.29451293477686	0.47	0.0887711496392459	0	C15H9.9 is expressed in the marginal cell.
15624	Y37D8A.6	Y37D8A.6	5.2928837105571	0.485	0.0916324685223343	0	Y37D8A.6 is an ortholog of human LITAF (lipopolysaccharide-induced TNF factor).
13891	T24A6.2	T24A6.2	5.29208040738998	0.6075	0.11479417416857	0	None
18676	ZK177.2	ZK177.2	5.28740931352495	0.7	0.132389977490381	0	ZK177.2 is predicted to have ATP binding activity and protein kinase activity, based on protein domain information.
17395	rab-19	Y62E10A.9	5.28229460408082	0.6175	0.116899954713422	0	rab-19 encodes a small GTPase homologous to the Rab GTPases that function in endocytosis, membrane fusion, and vesicular trafficking events; the precise biological role and expression pattern of rab-19 are not yet known.
6937	F35B3.7	F35B3.7	5.28156050397047	1.0275	0.194544775020103	0	F35B3.7 is an ortholog of human LZTS1 (leucine zipper, putative tumor suppressor 1) and LZTS2 (leucine zipper, putative tumor suppressor 2).
6715	nac-1	F31F6.6	5.27744983008654	0.8025	0.152062080329969	0	nac-1 encodes a low-affinity sodium-coupled dicarboxylate transporter homologous to INDY in D. melanogaster and to mammalian NaDC1 and NaDC3; nac-1 is expressed in the intestine, in larvae and adults.
13408	T19A5.3	T19A5.3	5.27419785551817	1	0.189602291645874	0	T19A5.3 is involved in the molting cycle and nematode larval development.
19070	srw-101	ZK697.13	5.27137876439881	0.5925	0.112399435988465	0	srw-101 is an ortholog of human GPR142 (G protein-coupled receptor 142) and GPR139 (G protein-coupled receptor 139).
7979	sptf-1	F45H11.1	5.27133598734985	1.715	0.325344467534541	0	sptf-1 is an ortholog of members of the human Zinc fingers, C2H2-type family including SP9; sptf-1 is involved in nematode larval development and reproduction; sptf-1 is predicted to have nucleic acid binding activity, based on protein domain information; sptf-1 is expressed in certain amphid neurons, pharyngeal cell, seam cell, intestinal cell, and the rectal epithelial cell.
9585	nhr-3	H01A20.1	5.26654454483202	1.4925	0.283392647170253	0	nhr-3 encodes a member of the superfamily of nuclear receptors which is one of the most abundant class of transcriptional regulators; nuclear receptors have a well conserved DNA binding domain and a less conserved C-terminal ligand binding domain; nhr-3 has been identified and characterised as a gene affected by ethanol exposure in a microarray analysis of all C. elegans ORFs.
8200	F47G4.5	F47G4.5	5.26439823789876	2.0575	0.390832894287502	0	F47G4.5 encodes a paralog of MEI-2 that, like MEI-2, binds MEI-1 in vitro; F47G4.5 might thus be an alternative ligand of MEI-1 in vivo.
8538	F53A9.7	F53A9.7	5.26297291216012	0.89	0.169105943514102	0	None
5993	F22B5.4	F22B5.4	5.26257295750139	1.6875	0.320660637605907	0	None
12145	oat-1	T01B11.7	5.25656759580923	1.1825	0.224956681037022	0	oat-1 encodes a transmembrane organic anion transporter; although loss of oat-1 activity via large-scale RNAi screens results in no obvious abnormalities, when expressed in mammalian cells OAT-1 can transport a variety of structurally diverse organic anions via an anion exchange mechanism that is functionally coupled to a sodium-coupled dicarboxylate transporter; by homology with mammalian OAT1 t…
12361	snf-11	T03F7.1	5.25363850746565	1.655	0.315019771087822	0	snf-11 encodes an electrogenic, Na[+]/Cl[-]-coupled, high-affinity GABA transporter that is required in vivo for GABA uptake, and for normal aldicarb sensitivity; SNF-11 is orthologous to human SLC6A1 (OMIM:137165); SNF-11 is selective for GABA with a Kt of ~15 microM, has an EC50 value of 168 microM, is blocked by GAT1 inhibitor SKF89976A, and has a 2:1:1 stoichiometry of Na[+]:Cl[-]:GABA; SNF-1…
7497	hst-3.1	F40H3.5	5.25294787731491	1.0125	0.192748914256798	0	hst-3.1 is an ortholog of human HS3ST1 (heparan sulfate (glucosamine) 3-O-sulfotransferase 1) and HS3ST5 (heparan sulfate (glucosamine) 3-O-sulfotransferase 5); hst-3.1 is involved in heparan sulfate proteoglycan biosynthetic process and lipid storage; hst-3.1 is predicted to have sulfotransferase activity, based on protein domain information; hst-3.1 is expressed in the pharynx, B cell, K cell, …
4424	kin-33	DC2.7	5.25236686521425	0.8875	0.168971441404407	0	kin-33 is an ortholog of human CHEK1 (checkpoint kinase 1); kin-33 is predicted to have ATP binding activity and protein kinase activity, based on protein domain information.
8815	dhrs-4	F54F3.4	5.24740397058083	1.1575	0.220585265874218	0	dhrs-4 encodes a member of the short-chain dehydrogenase/reductase (SDR) family; by orthology to human DHRS4, C. elegans DHRS-4 is predicted to function as a tetrameric, peroxisomal NADPH-dependent carbonyl-reductase that acts on a large and diverse set of small molecule substrates.
5840	bbs-2	F20D12.3	5.24173974921463	2.045	0.390137644721183	0	bbs-2 encodes a ciliary protein that is orthologous to human BBS2; bbs-2 is expressed exclusively in ciliated sensory neurons at the transition zone and along the axoneme; BBS proteins are required for ciliary structure and function; BBS-2 along with other BBS proteins undergoes intraflagellar transport (IFT); loss of function mutations in the guanylate cyclase complex GCY-35/GCY-36 results in a …
1544	C12D12.3	C12D12.3	5.24146319650682	0.7425	0.141658917016691	0	None
14677	ret-1	W06A7.3	5.24071324240733	0.6275	0.119735610588714	0	ret-1 is an ortholog of human RTN3 (reticulon 3) and RTN4 (reticulon 4); ret-1 is expressed in the gonad and the oocyte; ret-1 is localized to the endomembrane system.
3763	ets-8	C50A2.4	5.23554113904865	0.6075	0.116033850917345	0	ets-8 is an ortholog of human ETV4 (ets variant 4) and ETV5 (ets variant 5); ets-8 is predicted to have sequence-specific DNA binding activity and transcription factor activity, sequence-specific DNA binding, based on protein domain information.
1101	glr-1	C06E1.4	5.23516760410517	1.9725	0.376778767971681	0	glr-1 encodes an AMPA-type ionotropic glutamate receptor; GLR-1 activity is required for mediating the behavioral response to light nose touch and the frequency with which animals change locomotory direction in response to sensory cues such as food; GLR-1 is also required for memory formation; GLR-1 and GLR-2, a second AMPA-type ionotropic glutamate receptor, can interact to form functional heter…
5642	F17C11.2	F17C11.2	5.23234581814997	0.41	0.0783587351160528	0	F17C11.2 is expressed in certain interneurons.
14528	lam-1	W03F8.5	5.23057090591996	0.82	0.156770649848552	0	lam-1 encodes a laminin beta that affects degenerin-induced cell death and is required redundantly with lam-2 for morphogenesis.
10747	K10D6.3	K10D6.3	5.22783541614259	0.4825	0.0922944128099612	0	non-coding Transcript Isoform
7652	ifo-1	F42C5.10	5.2252259991682	0.68	0.130137911758888	0	ifo-1 is expressed in the intestine.
1785	C16A11.5	C16A11.5	5.22513971946192	0.4625	0.0885143794867991	0	None
254	B0284.2	B0284.2	5.22493158814556	1.2625	0.241629957962395	0	B0284.2 is an ortholog of human ALS2CR12 (amyotrophic lateral sclerosis 2 (juvenile) chromosome region, candidate 12).
64	B0024.3	B0024.3	5.22313363268387	1.13	0.21634522098554	0	B0024.3 is an ortholog of human B3GALT4 (UDP-Gal:betaGlcNAc beta 1,3-galactosyltransferase, polypeptide 4); B0024.3 is predicted to have galactosyltransferase activity, based on protein domain information.
13102	hpa-2	T11F1.8	5.22088428343371	0.49	0.0938538326840167	0	hpa-2 encodes one of 54 C. elegans insulin receptor-related proteins, predicted secreted proteins that contain regions of similarity to the extracellular ligand-binding domains of the insulin and epidermal growth factor (EGF) receptors; hpa-2 functions in older adult animals to negatively regulate aging-associated changes, such as locomotory capacity and pharyngeal pumping; in regulating these as…
19191	syd-9	ZK867.1	5.21997588239908	0.83	0.1590045660553	0	syd-9 is an ortholog of human ZFP91-CNTF (ZFP91-CNTF readthrough (NMD candidate)) and CTC-398G3.6 and members of the Zinc fingers, C2H2-type family including ZNF276; syd-9 is involved in axonal fasciculation, embryo development, locomotion, nematode larval development, oviposition and positive regulation of growth; syd-9 is predicted to have metal ion binding activity and nucleic acid binding act…
12837	T08B1.1	T08B1.1	5.21216650216527	0.77	0.14773127444799	0	T08B1.1 is an ortholog of members of the human SLC (Solute carriers) family including SLC2A14; T08B1.1 is involved in embryo development and nematode larval development; T08B1.1 is predicted to have transmembrane transporter activity, based on protein domain information.
13472	lpr-7	T19D7.3	5.20792151093541	1.505	0.288982849845155	0	lpr-7 encodes one of seven C. elegans proteins related to the lipocalin family of structurally related, low molecular weight, secreted proteins that bind and transport lipophilic molecules and participate in intercellular signaling.
8867	cutl-21	F55A4.10	5.20441629696351	1.2675	0.243543161745058	0	None
15796	Y38H8A.1	Y38H8A.1	5.2032386907997	0.7275	0.139816764755835	0	Y38H8A.1 is involved in reproduction.
16205	Y44E3A.1	Y44E3A.1	5.2021175088137	1.055	0.20280203171354	0	non-coding Transcript Isoform
13045	T10E10.4	T10E10.4	5.19783270149634	1.68	0.323211633863546	0	T10E10.4 encodes a large (966-residue) protein, predicted to be secreted, with two N-terminal chitin-binding peritrophin-A domains followed by 14 cysteine-rich domains and one C-terminal EB module; the general organization of T10E10.4 protein resembles that of K04H4.2; T10E10.4 has no obvious function in mass RNAi assays but, like CEJ-1 and CPG-2, might participate in chitin synthesis.
3571	C47A10.12	C47A10.12	5.19724460385815	0.795	0.152965669426033	0	C47A10.12 is an ortholog of human VMO1 (vitelline membrane outer layer 1 (chicken)).
4534	E04D5.4	E04D5.4	5.19692392176549	1.025	0.197232057930875	0	None
3116	ceh-37	C37E2.5	5.1945859241267	0.995	0.191545585063602	0	ceh-37 encodes one of three C. elegans proteins with an OTX-like homeodomain; however, CEH-37 lacks other domains found in OTX proteins, and the CEH-37 homeodomain is predicted to resemble the Myb domain of telomere-binding proteins; CEH-37 binds the telomeric sequence 'TTAGGC' if it is repeated at least 1.5 times, and is mainly localized to the telomere in vivo; ceh-37 mutants have a weak increa…
9683	nhr-101	H12C20.6	5.19434958591483	0.8875	0.170858735116053	0	nhr-101 encodes a member of the nuclear hormone receptor family.
5066	spon-1	F10E7.4	5.19377150220786	0.77	0.148254500544099	0	spon-1 encodes a conserved member of the spondin family of ECM proteins, closely related to vertebrates spondins (OMIM: 604989, 605918); spon-1 most resemble to F-spondins which contain a N-terminal reelin domain and upto six thrombospondin type I repeats (TSRs); spon-1 mutants display defects in epidermal elongation, muscle attachment, axon guidance and development of excretory canal and of epid…
18441	sth-1	ZC513.12	5.19326428898949	0.6775	0.130457446857924	0	sth-1 is expressed in the spermatheca and the germ line; sth-1 is localized to the plasma membrane.
16814	rga-2	Y53C10A.4	5.18174012197259	1.2875	0.24846865525743	0	rga-2 is an ortholog of human TAGAP (T-cell activation RhoGTPase activating protein) and ARHGAP20 (Rho GTPase activating protein 20); rga-2 is involved in embryo development and reproduction; rga-2 is expressed in the socket cell, rectum, vulva, and the uterus.
12638	cgt-1	T06C12.10	5.17959676221189	0.8875	0.171345384736283	0	cgt-1 encodes a transmembrane protein that is one of three C. elegans ceramide glucosyltransferases; by homology, CGT-1 is predicted to localize to the Golgi membrane and catalyze the transfer of glucose from UDP-glucose to ceramide to synthesize glucosylceramide, a glycosphingolipid precursor; although cgt-1 mutant worms show no obvious defects, animals doubly mutant for cgt-1 and cgt-3 arrest d…
5926	F21E9.2	F21E9.2	5.16989956883487	1.4725	0.28482178046098	0	None
293	cyp-23A1	B0304.3	5.16774879546426	1.19	0.23027435099873	0	cyp-23A1 encodes a cytochrome P450 homologous to the human gene CYP7B1, which when mutated leads to giant cell hepatitis (OMIM:231100); as a cytochrome P450, CYP-23A1 is predicted to function as a membrane-associated, heme-containing NADPH-dependent monooxygenases that catalyzes the oxidative metabolism of a variety of exogenous compounds and endogenous substrates.
14571	W04A8.4	W04A8.4	5.16342899009628	1.3825	0.267748428931957	0	W04A8.4 is involved in striated muscle myosin thick filament assembly; W04A8.4 is predicted to have 3'-5' exonuclease activity and nucleic acid binding activity, based on protein domain information; W04A8.4 is localized to the endoplasmic reticulum.
11004	clec-265	M02F4.7	5.16181035305921	0.495	0.0958965878524833	0	None
1801	C16B8.3	C16B8.3	5.15812752412332	0.56	0.108566528722102	0	None
1122	C06E7.4	C06E7.4	5.15611862252352	1.36	0.263764296278813	0	C06E7.4 is involved in embryo development and reproduction.
11114	gbh-2	M05D6.7	5.15584977023008	0.9075	0.176013662236614	0	gbh-2 encodes an ortholog of human gamma butyrobetaine hydroxilase 2 involved in carnitine biosynthesis; RNA interference of gbh-2 results in malformation of the gonad and accumulation of fat in the pseudocoelomic cavity and in intestinal cells; the GBH-2-GFP fusion protein is predominantly expressed in intestinal cells from early embryogenesis.
5041	F10D11.5	F10D11.5	5.15527923395221	1.0575	0.205129528781952	0	None
17268	Y58A7A.2	Y58A7A.2	5.15492357261043	1.11	0.215328119683043	0	None
11926	R11H6.4	R11H6.4	5.15491086612257	0.5375	0.104269504160078	0	None
18815	clec-97	ZK39.6	5.15372937677881	0.9575	0.185787791713359	0	clec-97 is involved in lipid storage.
9492	F59B2.9	F59B2.9	5.15153452495414	1.865	0.362028050276263	0	This gene encodes a protein containing an F-box, a motif predicted to mediate protein-protein interactions either with homologs of yeast Skp-1p or with other proteins.
18211	ZC15.10	ZC15.10	5.14459980482078	1.1725	0.227908883972141	0	None
638	C01G5.9	C01G5.9	5.14442096977032	1.1125	0.216253686573723	0	None
5352	nmgp-1	F13H8.4	5.14258512948552	1.1475	0.223136802037694	0	F13H8.4 encodes a homolog of the human neuronal membrane glycoproteins PLP1 (OMIM:300401, mutated in Pelizaeus-Merzbacher disease and spastic paraplegia), M6A (OMIM:601275), and M6B (OMIM:300051); the presence of a myelin-related protein in C. elegans is currently unexplained, but suggests that some evolutionary precursor of myelin may exist in invertebrates, perhaps involving septate junctions b…
16	ugt-2	AC3.8	5.13850952388335	0.8725	0.169796318552042	0	ugt-2 is an ortholog of human UGT3A2 (UDP glycosyltransferase 3 family, polypeptide A2) and UGT3A1 (UDP glycosyltransferase 3 family, polypeptide A1); ugt-2 is predicted to have transferase activity, transferring hexosyl groups, based on protein domain information.
14272	del-10	T28D9.7	5.13729772096019	0.6375	0.124092477140073	0	del-10 is predicted to have sodium channel activity, based on protein domain information.
5086	lron-5	F10F2.4	5.13444721684703	1.1675	0.227385724439668	0	lron-5 is expressed in the nervous system, tail, and the intestine.
3431	C44E12.1	C44E12.1	5.13337603134656	0.8225	0.160225940000785	0	C44E12.1 is predicted to have hydrolase activity, based on protein domain information.
146	nlp-28	B0213.3	5.13069106329667	1.94	0.378116705150724	0	nlp-28 encodes a neuropeptide-like protein.
8354	F49E12.8	F49E12.8	5.12887120788118	1.515	0.295386633548529	0	F49E12.8 is an ortholog of human CFAP20 (cilia and flagella associated protein 20).
7908	btb-8	F45C12.6	5.12791325817471	2.4525	0.478264720271999	0	None
3730	C49F5.5	C49F5.5	5.12117503979434	0.7015	0.136980281780833	0	C49F5.5 is an ortholog of human EP300 (E1A binding protein p300); C49F5.5 is predicted to have histone acetyltransferase activity, transcription cofactor activity, and zinc ion binding activity, based on protein domain information.
1663	hsp-12.2	C14B9.1	5.11970715126932	1.655	0.32326067704667	0	hsp-12.2 encodes a small heat-shock protein that forms heterotetramers with HSP-12.3 and has no chaperone-like activity; structurally, HSP-12.2 is mostly a beta-sheet; at least one HSP-12 (which may or may not be HSP-12.2) is ubiquitously expressed in L1 larvae, and later expressed in adult spermatids (and perhaps spermatocytes), and some adult vulval cells.
3932	C52E2.4	C52E2.4	5.11674355061667	0.6425	0.125568145763836	0	None
13999	zig-10	T25D10.2	5.11574607997713	0.86	0.168108421832353	0	zig-10 is an ortholog of members of the human V-set domain containing family including F11R.
12862	T08D10.4	T08D10.4	5.11552865195933	0.845	0.165183318771238	0	None
8877	F55B11.1	F55B11.1	5.11347078556126	0.935	0.18285036508669	0	The F55B11.1 gene encodes an ortholog of the human gene XANTHINE DEHYDROGENASE (XDH), which when mutated leads to xanthinuria (OMIM:278300).
1685	pqn-13	C14C11.8	5.11203807962901	1.6525	0.323256590475149	0	The protein product of this gene is predicted to contain a glutamine/asparagine (Q/N)-rich ('prion') domain, by the algorithm of Michelitsch and Weissman (as of the WS77 release of WormBase, i.e., in wormpep77).
7628	F42A10.6	F42A10.6	5.11203764051878	1.0125	0.198061921918331	0	F42A10.6 is expressed in the intestine.
18367	ZC412.4	ZC412.4	5.10870107520468	0.43	0.0841701234168947	0	None
16845	elo-9	Y53F4B.2	5.10414747929032	0.774	0.151641386370681	0	The elo-9 gene encodes a paralog of elo-1 and elo-2, each of which encodes a polyunsaturated fatty acid (PUFA) elongase; elo-9 has no known function in vivo.
14874	W10C8.5	W10C8.5	5.10300087711256	0.6725	0.131785201726346	0	W10C8.5 is an ortholog of human CKB (creatine kinase, brain), CKMT2 (creatine kinase, mitochondrial 2 (sarcomeric)), CKM (creatine kinase, muscle) and CKMT1B (creatine kinase, mitochondrial 1B); W10C8.5 is predicted to have kinase activity, based on protein domain information.
15283	rab-28	Y11D7A.4	5.09941357408725	1.8025	0.353472016696083	0	rab-28 encodes a small GTPase homologous to the Rab GTPases that function in endocytosis, membrane fusion, and vesicular trafficking events; the precise biological role and expression pattern of rab-28 are not yet known.
9228	glo-2	F57C9.3	5.09198149502905	0.635	0.124705873463976	0	glo-2 is involved in embryo development and nematode larval development; glo-2 is expressed in the seam cell and the intestine.
8610	F53F10.1	F53F10.1	5.0908340007389	1.2675	0.248976886658656	0	F53F10.1 is an ortholog of human CCDC102A (coiled-coil domain containing 102A) and CCDC102B (coiled-coil domain containing 102B); F53F10.1 is expressed in the body wall musculature; F53F10.1 is localized to the mitochondrion.
1665	C14B9.2	C14B9.2	5.08921166905641	0.5025	0.0987382786719831	0	C14B9.2 encodes a protein disulfide isomerase; by homology, the product of C14B9.2 is predicted to function in oxidative protein folding in the endoplasmic reticulum (ER); C14B9.2 transcript levels are increased in response to ER stress.
3534	fbxc-53	C46E10.5	5.0884776536886	1.455	0.285940137507587	0	None
3651	C48B4.3	C48B4.3	5.0836390611388	1.1025	0.216872202518844	0	Uncharacterized protein C48B4.3
2634	C31B8.4	C31B8.4	5.07718175955863	0.9175	0.180710489293131	0	C31B8.4 is an ortholog of human ALS2CR12 (amyotrophic lateral sclerosis 2 (juvenile) chromosome region, candidate 12).
16024	col-95	Y41C4A.16	5.0761365490625	0.96	0.189120208000965	0	col-95 encodes a collagen.
13210	pho-14	T13B5.3	5.06740434966744	1.2375	0.244207865528081	0	pho-14 is an ortholog of human ACP2 (acid phosphatase 2, lysosomal), ACPP (acid phosphatase, prostate) and ACPT (acid phosphatase, testicular); pho-14 is predicted to have acid phosphatase activity, based on protein domain information; pho-14 is expressed in the anal depressor muscle, intestinal muscle, and the body wall musculature.
19024	ZK673.1	ZK673.1	5.05835428468024	1.27	0.25106980027997	0	Uncharacterized protein ZK673.1
722	C02F4.4	C02F4.4	5.05814395173463	1.9825	0.391942186485247	0	None
4873	col-130	F08G5.4	5.04860487915001	3.5325	0.699698250221304	0	col-130 is an ortholog of human SFTPD (surfactant protein D); col-130 is a structural constituent of cuticle, based on protein domain information; col-130 is expressed in the intestine and the vulva.
4456	E01G6.3	E01G6.3	5.04303077728473	1.005	0.199284922972672	0	E01G6.3 is an ortholog of human CEL (carboxyl ester lipase) and members of the CES (Carboxylesterases) family including CES4A.
7288	F38B6.6	F38B6.6	5.03500717852003	1.8175	0.360972673038816	0	F38B6.6 is an ortholog of human TMTC4 (transmembrane and tetratricopeptide repeat containing 4).
12836	spp-5	T08A9.9	5.03258614217975	0.6275	0.124687383836457	0	spp-5 encodes a caenopore, a saposin (B) domain-containing protein that is a member of the saposin-like protein (SAPLIP) superfamily containing mammalian NK-lysin and granulysin and the protozoan amoebapore-like proteins; SPP-5 exhibits pore-forming activity and functions as an effector of innate immunity, demonstrating antimicrobial activity against both Gram-positive and Gram-negative bacteria;…
11991	ttr-8	R13A5.6	5.03013283389062	1.2475	0.24800537902199	0	R13A5.6 encodes a protein containing a predicted signal sequence followed by a transthyretin-like domain; the product of R13A5.6 belongs to a family of apparently nematode-specific proteins whose function is not yet known; an R13A5.6::GFP promoter fusion directs expression outside of the nervous system.
18873	ZK512.1	ZK512.1	5.02988001253179	1.5075	0.29970893863156	0	Uncharacterized protein ZK512.1
5660	lys-10	F17E9.11	5.02854745488907	2.5375	0.504618883040048	0	None
14769	W08A12.4	W08A12.4	5.02554863597607	1.055	0.209927328619932	0	W08A12.4 is an ortholog of human ALS2CR12 (amyotrophic lateral sclerosis 2 (juvenile) chromosome region, candidate 12).
8883	ceh-24	F55B12.1	5.02170088148521	1.5875	0.316127948969052	0	ceh-24 encodes an NK class homeodomain protein orthologous to human NK2 Homeobox 1 (NKX2-1; OMIM:600635) which is expressed in the thyroid, lung, and bronchial epithelia and which, when mutated, leads to disease.
11486	R05G9R.1	R05G9R.1	5.01786972135308	2.3625	0.470817325118387	0	None
6774	F32D1.3	F32D1.3	5.01414049193562	0.81	0.161543140106015	0	F32D1.3 is an ortholog of human TMTC2 (transmembrane and tetratricopeptide repeat containing 2).
9137	che-14	F56H1.1	5.01364181663047	0.7125	0.142112266104971	0	che-14 encodes a protein with a sterol-sensing domain that is similar to the Drosophila and mammalian proteins Dispatched; CHE-14 protein is involved in the exocytotic secretion of lipid-modified proteins at the apical surface of certain epithelial cells.
203	calf-1	B0250.2	5.01212265348104	0.6925	0.138165014680764	0	calf-1 encodes a novel Type I transmembrane protein conserved amongst nematodes; CALF-1 is required, along with UNC-36, for proper intracellular trafficking, presynaptic localization, and functional maturation of UNC-2, an alpha 1 subunit of the C. elegans neuronal CaV2 voltage-gated calcium channel, in sensory and motor neurons throughout development; calf-1 also functions in a calcium-dependent…
2399	dmd-4	C27C12.6	5.00709238763588	1.1075	0.221186252271832	0	dmd-4 is an ortholog of human DMRT3 (doublesex and mab-3 related transcription factor 3); dmd-4 is involved in reproduction; dmd-4 is predicted to have sequence-specific DNA binding activity and transcription factor activity, sequence-specific DNA binding, based on protein domain information; dmd-4 is expressed in the hmc and the nervous system.
14021	bbs-8	T25F10.5	5.00609148433875	1.1425	0.228221957903534	0	bbs-8 encodes a tetratricopeptide repeat (TPR)-containing protein that is orthologous to the human Bardet-Biedl syndrome protein, BBS8; in C. elegans, bbs-8 activity is required for cilia biogenesis and function; accordingly, bbs-8 mutant animals display odorant chemotaxis defects and exhibit both aberrant motility and abnormal localization of at least two intraflagellar transport (IFT) protein m…
4117	C55B7.3	C55B7.3	5.00543856825555	0.925	0.18479899161411	0	C55B7.3 is an ortholog of human PTPN22 (protein tyrosine phosphatase, non-receptor type 22 (lymphoid)), PTPN18 (protein tyrosine phosphatase, non-receptor type 18 (brain-derived)) and PTPN12 (protein tyrosine phosphatase, non-receptor type 12); C55B7.3 is involved in embryo development; C55B7.3 is predicted to have protein tyrosine phosphatase activity, based on protein domain information.
14064	T26C5.5	T26C5.5	5.00502901660175	0.8875	0.177321649296368	0	T26C5.5 is involved in embryo development.
11266	R01B10.3	R01B10.3	5.00439260945433	0.6225	0.124390720029434	0	R01B10.3 is involved in reproduction.
19127	ZK813.6	ZK813.6	5.00257750254243	1.1925	0.238377116475246	0	ZK813.6 is an ortholog of human SPINK5 (serine peptidase inhibitor, Kazal type 5) and SPINK6 (serine peptidase inhibitor, Kazal type 6).
17229	Y57G11C.31	Y57G11C.31	4.99983092448935	0.675	0.13500456519316	0	Y57G11C.31 is involved in body morphogenesis, collagen and cuticulin-based cuticle development, embryo development, locomotion and nematode larval development.
1273	fbxa-158	C08E3.10	4.9963587441794	1.2375	0.247680373520346	0	This gene encodes a protein containing an F-box, a motif predicted to mediate protein-protein interactions either with homologs of yeast Skp-1p or with other proteins; this gene's encoded protein also contains an FTH/DUF38 motif, which may also mediate protein-protein interaction.
6068	F22G12.1	F22G12.1	4.99608172481725	1.2725	0.2546995966217	0	F22G12.1 is an ortholog of human ALS2CR12 (amyotrophic lateral sclerosis 2 (juvenile) chromosome region, candidate 12).
8251	F48E3.2	F48E3.2	4.99434692144044	0.855	0.171193554122068	0	F48E3.2 is an ortholog of members of the human SLC (Solute carriers) family including SLC2A14; F48E3.2 is involved in embryo development; F48E3.2 is predicted to have transmembrane transporter activity, based on protein domain information.
4455	E01G6.2	E01G6.2	4.99313232728207	1.06	0.212291589831947	0	None
10973	trx-3	M01H9.1	4.99102045387845	1.71	0.342615305988414	0	trx-3 is an ortholog of human NXNL1 (nucleoredoxin-like 1) and NXNL2 (nucleoredoxin-like 2); trx-3 is expressed in the intestine; trx-3 is localized to the apical plasma membrane, the cytoplasm and the nucleus.
15290	Y13C8A.2	Y13C8A.2	4.98969531759865	1.0125	0.202918201524032	0	None
3325	apl-1	C42D8.8	4.98818065009141	0.6175	0.123792629681261	0	apl-1 encodes two almost identical isoforms orthologous to human Amyloid precursor protein (APP); although native APL-1 is predicted to be membrane-bound until proteolytically cleaved, neuronal expression of a partial N-terminal extracellular region of APL-1 alone, containing either the E1 or the E2 domain, is sufficient for APL-1's normal functions in vivo (molting and morphogenesis, pharyngeal …
9981	K02D3.2	K02D3.2	4.98772697968796	1.8675	0.374419050522455	0	K02D3.2 is an ortholog of human STARD4 (StAR-related lipid transfer (START) domain containing 4), STARD5 (StAR-related lipid transfer (START) domain containing 5) and STARD6 (StAR-related lipid transfer (START) domain containing 6); K02D3.2 is involved in lipid storage; K02D3.2 is predicted to have lipid binding activity, based on protein domain information.
4893	ttr-34	F09A5.9	4.9859330355283	0.8375	0.16797257284288	0	None
18388	ZC443.3	ZC443.3	4.9834154795223	0.8725	0.175080725977043	0	ZC443.3 is an ortholog of human EIF3C (eukaryotic translation initiation factor 3, subunit C) and EIF3CL (eukaryotic translation initiation factor 3, subunit C-like).
12823	ptr-15	T07H8.6	4.9813080010262	0.94	0.188705456439624	0	ptr-15 encodes a nematode-specific member of the sterol sensing domain (SSD) proteins, distantly paralogous to Drosophila PATCHED (PTC) and human PTCH (OMIM:601309, mutated in basal cell nevus syndrome); PTR-15 has no known function in vivo.
19124	ZK813.3	ZK813.3	4.98120952942106	0.6075	0.121958330885673	0	ZK813.3 is expressed in the spermatheca.
17649	cdh-12	Y71D11A.1	4.97106568388871	0.535	0.107622798414019	0	cdh-12 encodes a cadherin; by sequence similarity, CDH-12 is predicted to function in cellular adhesion.
18616	ins-7	ZK1251.2	4.97083541929761	1.3425	0.270075326732442	0	ins-7 encodes an insulin/IGF-1-like peptide; INS-7 is one of 40 insulin-like peptides in C. elegans; INS-7 likely functions as an agonist for the DAF-2 insulin/IGF-1 receptor, as loss of ins-7 activity via RNAi results in: 1) a significantly increased lifespan that is not further extended in long-lived daf-2 mutant animals, and 2) an increased frequency of dauer formation in animals containing an…
12787	bus-19	T07F10.4	4.96536618073377	0.6925	0.139466048382692	0	bus-19 encodes an ancient but unfamiliar transmembrane protein required for colonization by Microbacterium nematophilum and the tail-swelling response to M. nematophilum infection, as well as for cuticle integrity and traction during movement, normal alae and body shape, dauer formation, normally rapid growth, and larval viability; BUS-19 (along with Y71A12C.2) is orthologous to human TMEM41A, an…
3610	C47E12.13	C47E12.13	4.96282966628261	0.75	0.151123461902287	0	non-coding Transcript Isoform
6863	nhr-15	F33E11.1	4.95508640225546	0.54	0.108978927139233	0	nhr-15 is predicted to encode a member of the nuclear hormone receptor family.
7461	F40F9.10	F40F9.10	4.95257723967589	2.05	0.413925901766281	0	F40F9.10 is an ortholog of human TRMT12 (tRNA methyltransferase 12 (S. cerevisiae)); F40F9.10 is expressed in the pharynx, anal depressor muscle, and the body wall musculature.
3412	C44C10.3	C44C10.3	4.94614043141902	0.7925	0.160225940000785	0	C44C10.3 is an ortholog of members of the human SLC (Solute carriers) family including SLC22A15; C44C10.3 is predicted to have transmembrane transporter activity, based on protein domain information.
8374	F49F1.5	F49F1.5	4.94582829881024	1.84	0.372030707261436	0	F49F1.5 is involved in engulfment of apoptotic cell.
10568	skr-21	K08H2.1	4.9432059616013	1.305	0.263998710581191	0	The skr-21 gene encodes a homolog of Skp1 in S. cerevisiae that has no known function in vivo, since skr-21(RNAi) animals are at least superficially normal.
539	best-1	B0564.3	4.94179750181614	0.6125	0.12394275560156	0	best-1 is an ortholog of human BEST2 (bestrophin 2), BEST4 (bestrophin 4) and BEST1 (bestrophin 1); best-1 is involved in reproduction.
10240	fbxb-49	K05F6.1	4.94087919750993	1.7925	0.362789683444066	0	None
8813	nid-1	F54F3.1	4.93791849176614	0.485	0.098219523228001	0	nid-1 encodes the single C.elegans homolog of the nidogen (entactin) protein; members of the nidogen protein family are structural components of basement membranes and are believed to connect laminin and collagen IV networks together; in C. elegans, nid-1 is not required for basement membrane assembly, however, nid-1 is required for the proper positioning of the longitudinal neurons and to direct…
5459	cng-1	F14H8.6	4.93658816733373	1.69	0.342341702956513	0	cng-1 is an ortholog of members of the human CNG (Cyclic nucleotide gated channels) family including CNGA1; cng-1 is predicted to have ion channel activity, based on protein domain information; cng-1 is expressed in certain interneurons, all amphid neurons, and the head neurons; cng-1 is localized to the neuronal cell body.
1733	C15C6.1	C15C6.1	4.93642523931651	1.4525	0.294241263583101	0	None
16393	Y47D7A.13	Y47D7A.13	4.93289315267293	3.3075	0.6704990150066	0	None
16416	Y47G6A.17	Y47G6A.17	4.93240178232309	1.0325	0.209330067899235	0	ccep-290 is involved in reproduction; ccep-290 is localized to the central cylinder.
10876	sodh-1	K12G11.3	4.92794735683982	1.03	0.209011973021667	0	sodh-1 is involved in determination of adult lifespan; sodh-1 is predicted to have oxidoreductase activity and zinc ion binding activity, based on protein domain information; sodh-1 is expressed in the muscle cell, hypodermis, nervous system, and the intestine.
13509	clec-26	T20B3.12	4.92610013731111	0.9725	0.197417830107456	0	clec-26 is an ortholog of human CLEC3B (C-type lectin domain family 3, member B) and CLEC3A (C-type lectin domain family 3, member A).
13982	T25B9.3	T25B9.3	4.92443721553718	1.4325	0.290896185147877	0	None
14848	W09G12.10	W09G12.10	4.92326303940753	2.0475	0.415882715104005	0	None
8468	F52E1.5	F52E1.5	4.92325997993854	0.8775	0.178235560091416	0	F52E1.5 is involved in innate immune response.
3172	C39B10.3	C39B10.3	4.92029123485939	0.6925	0.140743701326816	0	None
12830	T08A9.13	T08A9.13	4.91988444359387	1.01	0.205289374492344	0	None
13400	grd-6	T18H9.1	4.90738890271649	2.74	0.558341728018187	0	grd-6 encodes a hedgehog-like protein, with an N-terminal signal sequence, a central low-complexity proline-rich domain, and a C-terminal Ground domain; GRD-6 is expressed in hypodermis and in various neurons, in both head and tail, and the PVT interneuron; the Ground domain is predicted to form a cysteine-crosslinked protein involved in intercellular signalling, and it has subtle similarity to t…
10913	M01B2.10	M01B2.10	4.90547696242228	0.5975	0.121802630932133	0	M01B2.10 is an ortholog of human PHYHIPL (phytanoyl-CoA 2-hydroxylase interacting protein-like) and PHYHIP (phytanoyl-CoA 2-hydroxylase interacting protein).
11056	M03F8.1	M03F8.1	4.90366938050961	1.4425	0.294167466863373	0	None
18195	ZC123.1	ZC123.1	4.90126731105548	0.5375	0.109665514220699	0	ZC123.1 is expressed in the hypodermis.
11054	M03F4.6	M03F4.6	4.90058593126281	1.295	0.26425411535765	0	M03F4.6 is an ortholog of human DLK2 (delta-like 2 (Drosophila)) and WIF1 (WNT inhibitory factor 1); M03F4.6 is involved in embryo development, hermaphrodite genitalia development, locomotion and oviposition.
13004	cyp-13A4	T10B9.1	4.89832379907412	1.8975	0.38737741273018	0	cyp-13A4 encodes one of ~80 C. elegans cytochrome P450s: membrane-associated, heme-containing NADPH-dependent monooxygenases that catalyze the oxidative metabolism of a variety of exogenous compounds and endogenous substrates; loss of cyp-13A4 activity in large-scale RNAi screens in wild-type and various mutant backgrounds results in uncoordinated locomotion, reduced and/or slow growth, alteratio…
17118	fbxb-22	Y56A3A.10	4.89326784479839	1.9175	0.391864917437195	0	This gene encodes a protein containing an F-box, a motif predicted to mediate protein-protein interactions either with homologs of yeast Skp-1p or with other proteins.
14299	T28H10.2	T28H10.2	4.88909351108218	0.93	0.190219311185592	0	T28H10.2 is an ortholog of human THAP4 (THAP domain containing 4).
9768	pme-4	H23L24.5	4.88880570984134	2.18	0.44591667768911	0	parg-2 (formerly known as pme-4) encodes a poly(ADP-ribose) glycohydrolase (PARG) orthologous to human PARG (OMIM:603501) and paralogous to PARG-1; PARG-2 exhibits poly(ADP-ribose) glycohydrolase activity in vitro, and is required in vivo for normal resistance to ionizing radiation; PARG-2 is primarily expressed in the cytoplasm of nerve cells in the head and tail, and also in embryos; neuronal e…
18201	mam-1	ZC13.3	4.8863946922612	1.3375	0.273719190575878	0	mam-1 is involved in the molting cycle and nematode larval development.
3366	C43H6.6	C43H6.6	4.88031607425705	1.72	0.352436189342889	0	C43H6.6 is an ortholog of human NRP1 (neuropilin 1).
7985	gei-1	F45H7.2	4.87470436511071	0.505	0.103596025969163	0	gei-1 encodes a protein containing a RhoGAP domain and a START (StAR-related lipid-transfer) domain and interacts with GEX-2 in yeast two-hybrid assays.
1206	tol-1	C07F11.1	4.8718971226896	0.7775	0.159588755759844	0	tol-1 encodes a predicted transmembrane protein that is the sole C. elegans Toll-like receptor (TLR); TOL-1 is required for proper embryonic development and for pathogen avoidance behavior, and is expressed primarily in the nervous system.
11963	inx-15	R12E2.9	4.87140823810994	0.7725	0.158578374515317	0	inx-15 is involved in striated muscle myosin thick filament assembly; inx-15 is expressed in the intestine.
15611	Y37D8A.16	Y37D8A.16	4.86830336552059	1.5	0.308115556360691	0	Y37D8A.16 is involved in locomotion and nematode larval development.
18530	ZK1073.1	ZK1073.1	4.86641495002659	0.48	0.0986352386570277	0	ZK1073.1 is an ortholog of human NDRG3 (NDRG family member 3), NDRG1 (N-myc downstream regulated 1), NDRG2 (NDRG family member 2) and NDRG4 (NDRG family member 4).
11501	tts-2	R05H5.8	4.86221442818945	2.255	0.463780450925052	0	C. elegans ncRNA tts-2
19128	ZK813.7	ZK813.7	4.8610854393571	0.92	0.1892581423382	0	None
9035	ugt-52	F56B3.7	4.85762597297275	1.3075	0.269164404026735	0	ugt-52 is an ortholog of members of the human UGT (UDP glucuronosyltransferases) family including UGT2A3; ugt-52 is predicted to have transferase activity, transferring hexosyl groups, based on protein domain information.
2055	C18E9.7	C18E9.7	4.8518897539096	1.315	0.271028417111165	0	C18E9.7 is an ortholog of members of the human Fibrinogen C domain containing family including FGA and Fibronectin type III domain containing family including TNN; C18E9.7 is involved in reproduction.
10880	pros-1	K12H4.1	4.85168778598596	0.655	0.13500456519316	0	pros-1 encodes a homeodomain protein that is the C. elegans homolog of Drosophila prospero and mammalian Prox1 (Prospero-related homeobox); PROS-1 is required for excretory canal growth, and loss of pros-1 function in large-scale RNAi screens has been reported to result in locomotion defects, slow growth, and larval lethality; in regulating excretory canal growth, PROS-1 functions via regulation …
10261	haao-1	K06A4.5	4.84849187595683	0.7275	0.150046657519959	0	haao-1 is an ortholog of human HAAO (3-hydroxyanthranilate 3,4-dioxygenase); haao-1 is predicted to have 3-hydroxyanthranilate 3,4-dioxygenase activity and iron ion binding activity, based on protein domain information.
8920	fbxb-57	F55C9.4	4.84844317943667	2.65	0.546567197330319	0	This gene encodes a protein containing an F-box, a motif predicted to mediate protein-protein interactions either with homologs of yeast Skp-1p or with other proteins.
13341	T16A1.9	T16A1.9	4.84511079479788	2.155	0.444778270563759	0	None
925	C04H5.7	C04H5.7	4.84107673436192	0.8925	0.184359812697255	0	None
10789	K11D12.13	K11D12.13	4.84074881308633	1.055	0.217941488132569	0	K11D12.13 is predicted to have serine-type endopeptidase inhibitor activity, based on protein domain information.
1936	C17G1.5	C17G1.5	4.83975810853316	0.6975	0.144118772954832	0	None
6977	F35D2.3	F35D2.3	4.83233865374725	0.885	0.183141137948543	0	F35D2.3 is an ortholog of human DLK2 (delta-like 2 (Drosophila)) and WIF1 (WNT inhibitory factor 1); F35D2.3 is involved in determination of adult lifespan.
5344	F13H6.5	F13H6.5	4.8321115547941	0.6225	0.128825668228292	0	F13H6.5 is an ortholog of human GPR142 (G protein-coupled receptor 142) and GPR139 (G protein-coupled receptor 139).
13433	T19C3.2	T19C3.2	4.83057905445541	0.935	0.193558575371542	0	Uncharacterized protein T19C3.2
5115	F10G8.8	F10G8.8	4.82537064564191	0.815	0.168898942661757	0	F10G8.8 is an ortholog of human TRIOBP (TRIO and F-actin binding protein) and MPRIP (myosin phosphatase Rho interacting protein).
11337	mocs-1	R03A10.3	4.82511831026072	0.435	0.0901532298337561	0	mocs-1 is an ortholog of human MOCOS (molybdenum cofactor sulfurase); mocs-1 is predicted to have catalytic activity, molybdenum ion binding activity, and pyridoxal phosphate binding activity, based on protein domain information.
2677	fbxc-40	C32B5.1	4.82484304184673	1.4375	0.297937153091262	0	None
17450	grl-16	Y65B4BR.6	4.82128135970366	2.455	0.509200732510433	0	grl-16 encodes, by alternative splicing, two hedgehog-like proteins with an N-terminal signal sequence, a central proline-rich low-complexity region, and a C-terminal Ground-like (Grl) domain; the Grl domain is predicted to form a cysteine-crosslinked protein involved in intercellular signalling, and it has subtle similarity to the N-terminal Hedge domain of HEDGEHOG proteins.
15717	Y38C1AB.1	Y38C1AB.1	4.8187390437866	1.4725	0.305577867284322	0	Y38C1AB.1 is an ortholog of human C1GALT1C1 (C1GALT1-specific chaperone 1) and C1GALT1 (core 1 synthase, glycoprotein-N-acetylgalactosamine 3-beta-galactosyltransferase 1); Y38C1AB.1 is predicted to have transferase activity, transferring glycosyl groups, based on protein domain information.
12785	T07F10.1	T07F10.1	4.81562911888858	0.545	0.113173167315215	0	T07F10.1 is an ortholog of human ANPEP (alanyl (membrane) aminopeptidase) and ERAP1 (endoplasmic reticulum aminopeptidase 1) and members of the Aminopeptidases family including LNPEP; T07F10.1 is predicted to have metallopeptidase activity and zinc ion binding activity, based on protein domain information; T07F10.1 is expressed in the pharynx, nervous system, intestine, and the excretory cell.
13086	T10H9.8	T10H9.8	4.81391834863656	0.8225	0.170858735116053	0	None
17607	Y6D1A.2	Y6D1A.2	4.81273644989178	1.585	0.329334468342982	0	Y6D1A.2 is an ortholog of human RNF224 (ring finger protein 224) and RNF182 (ring finger protein 182); Y6D1A.2 is predicted to have zinc ion binding activity, based on protein domain information.
387	B0403.5	B0403.5	4.81250555234009	1.5225	0.316363271364888	0	None
9579	F59H6.3	F59H6.3	4.81167789118552	0.6625	0.137685858235363	0	F59H6.3 is involved in apoptotic process, embryo development, nematode larval development and oogenesis.
10924	math-34	M01D1.2	4.80952328020395	1.0275	0.213638637373729	0	None
17017	lad-2	Y54G2A.25	4.80887241188945	0.8025	0.166879037592243	0	lad-2 encodes one of two C. elegans L1CAM molecules; LAD-2 is a noncanonical member of the L1CAM branch of the immunoglobulin superfamily and is most closely related to Drosophila Neuroglian; mutational analyses indicate that lad-2 is required for proper anterior/posterior and dorsal/ventral axonal pathfinding; in regulating axon guidance, LAD-2 functions, in part, as a MAB-20/Sema2 co-receptor w…
13293	ttr-54	T14G10.4	4.80812061977327	0.7875	0.163785408536014	0	None
6714	daf-6	F31F6.5	4.80760380785812	0.7525	0.1565228812678	0	daf-6 encodes a Patched-related protein; daf-6 is required for amphid channel morphogenesis and thus, also for normal morphology of the outer labial sensilla; specifically, daf-6 is required for restricting the amphid sensory compartment diameter; daf-6 mutants display defects in several neuron-mediated functions including dauer larvae formation, chemotaxis, osmotic avoidance, male mating, negati…
6035	chw-1	F22E12.2	4.80493371122809	1.005	0.20916001351934	0	chw-1 is an ortholog of human RHOV (ras family member V) and RHOU (ras family member U); chw-1 is involved in establishment or maintenance of cell polarity and vulval development; chw-1 is predicted to have GTP binding activity, based on protein domain information; chw-1 is expressed in the hyp7, P3.p, P4.p, and the P8.p.
1503	ceh-34	C10G8.6	4.80332966762157	0.675	0.140527518764756	0	ceh-34 encodes a homeodomain protein, homologous to human SIX2 (OMIM:604994); ceh-34 activity is required for regulation of the programmed cell death of a pharyngeal neuron, the sister of the M4 motor neuron; CEH-34 binds the egl-1 5'-regulatory region in vitro and acts together with EYA-1, with which it physically interacts, to regulate expression of egl-1 to promote programmed cell death of the…
7930	his-71	F45E1.6	4.79642641168491	0.885	0.184512369009559	0	his-71 encodes an H3 histone required for embryonic viability, body morphology, and larval viability.
6429	stn-2	F27D9.8	4.79543468347166	1.495	0.311754845739593	0	stn-2 encodes a gamma-syntrophin; loss-of-functions stn-2 mutations indicate that STN-2 activity is required for normal rates of locomotion and head movements; the STN-2 PDZ domain interacts with the SAX-7/L1CAM intracellular PB motif in vitro and genetic studies indicate that stn-2 and sax-7 interact to regulate neuronal and axon positioning; an STN-2::GFP reporter fusion is expressed in body wa…
5126	acs-14	F11A3.1	4.79163294267771	1.21	0.252523516403536	0.0132980086952955	acs-14 is predicted to have catalytic activity, based on protein domain information.
4889	spin-3	F09A5.1	4.7909284799733	0.5775	0.120540309130897	0.0132980086952955	spin-3 is an ortholog of human SPNS3 (spinster 3 (Drosophila)), SPNS2 (spinster 2 (Drosophila)) and SPNS1 (spinster 1 (Drosophila)).
4732	F07C6.6	F07C6.6	4.78467724898306	1.2375	0.258638134946933	0.0132980086952955	None
3575	ddo-1	C47A10.5	4.78341187705844	0.9	0.188150220623162	0.0132980086952955	ddo-1 encodes a D-aspartate oxidase (DASPO), paralogous to DDO-2 and DDO-3; recombinant DDO-1 has DASPO acvitity on acidic D-amino acid substrates (e.g., D-aspartate, D-glutamate, or N-methyl-D-aspartate/NMDA), with highest catalytic efficiency on D-glutamate; since the C-terminal residues of DDO-1 match the PTS1 consensus sequence, DDO-1 is predicted to be peroxisomal.
8999	F56A11.7	F56A11.7	4.78215904441901	0.8775	0.183494524512747	0.0132980086952955	None
9691	H12D21.9	H12D21.9	4.7817348756534	1.2775	0.267162449031731	0.0132980086952955	None
15368	Y18D10A.23	Y18D10A.23	4.78133511668779	0.7975	0.166794416316181	0.0132980086952955	Y18D10A.23 is expressed in the excretory cell and the ut2.
9491	F59B2.8	F59B2.8	4.77659422078349	1.315	0.275300755981801	0.0132980086952955	This gene encodes a protein containing an F-box, a motif predicted to mediate protein-protein interactions either with homologs of yeast Skp-1p or with other proteins.
2777	ceh-30	C33D12.7	4.7759147077169	0.81	0.169601018772636	0.0132980086952955	ceh-30 encodes a homeodomain protein most similar to Drosophila and mammalian BarH1 (OMIM:605211) which function in neuronal cell fate determination; CEH-30 functions as a key regulator of sex-specific apoptosis; ceh-30 transcription is under the regulatory control of TRA-1A and UNC-86.
9495	cdh-9	F59C12.1	4.77274235768381	1.4825	0.310618065861709	0.0132980086952955	cdh-9 encodes a member of the cadherin superfamily of transmembrane glycoproteins that mediate homophilic cell-cell adhesion; as loss of CDH-9 activity via RNA-mediated interference (RNAi) does not result in any abnormalities, the precise role of CDH-9 in C. elegans development and/or behavior is not yet known.
17069	Y55B1BR.5	Y55B1BR.5	4.77258452610448	1.0425	0.218435104563966	0.0132980086952955	None
17860	Y73E7A.8	Y73E7A.8	4.76738990506024	1.86	0.390150593310134	0.0132980086952955	Y73E7A.8 is involved in hermaphrodite genitalia development and inductive cell migration.
6157	fipr-1	F23H12.8	4.76701706049602	1.3025	0.273231663212145	0.0132980086952955	fipr-1 is involved in nematode larval development and reproduction.
4696	cln-3.1	F07B10.1	4.76620400060425	0.9225	0.193550255063159	0.0132980086952955	cln-3.1 encodes a predicted transmembrane protein that comprises one of three C. elegans homologs of human CLN3; as loss of cln-3.1 activity via deletion mutation results in no obvious abnormalities, the precise role of cln-3.1 in C. elegans development and/or behavior is not yet known.
1359	msp-55	C09B9.6	4.76463440703006	0.87	0.182595331704011	0.0132980086952955	msp-55 encodes a member of the major sperm protein family.
2512	clec-230	C29F3.5	4.76031770919586	3.0725	0.645440112970742	0.0132980086952955	None
6329	F26E4.2	F26E4.2	4.75972595071953	0.86	0.180682671419348	0.0132980086952955	F26E4.2 is involved in cell division, mitotic spindle organization and positive regulation of vulval development.
18311	ZC328.2	ZC328.2	4.75760428295706	0.85	0.178661349167881	0.0132980086952955	klu-2 is an ortholog of members of the human Zinc fingers, C2H2-type family including EGR1; klu-2 is involved in reproduction; klu-2 is predicted to have nucleic acid binding activity, based on protein domain information.
17965	lron-13	Y76A2B.2	4.75468797171399	1.27	0.267104804259571	0.0132980086952955	None
17504	nhr-62	Y67A6A.2	4.75450527501942	1.0425	0.219265715294793	0.0132980086952955	nhr-62 is predicted to have sequence-specific DNA binding activity, steroid hormone receptor activity, transcription factor activity, sequence-specific DNA binding, and zinc ion binding activity, based on protein domain information; nhr-62 is expressed in the pharynx, spermatheca, all motor neurons, hypodermis, all sensory neurons, intestine, excretory cell, and the ventral nerve cord.
9883	col-69	K01A2.7	4.75389882743479	2.1625	0.454889781734562	0.0132980086952955	col-69 is an ortholog of human SFTPD (surfactant protein D) and COL8A2 (collagen, type VIII, alpha 2); col-69 is a structural constituent of cuticle, based on protein domain information.
9765	sgca-1	H22K11.4	4.75231602288796	0.8775	0.184646811317642	0.0132980086952955	sgca-1 encodes a protein orthologous to the human gene SARCOGLYCAN, ALPHA (50KD DYSTROPHIN-ASSOCIATED GLYCOPROTEIN) (SGCA; OMIM:600119), which when mutated leads to disease.
1112	C06E2.9	C06E2.9	4.75082774537521	0.7525	0.158393450642898	0.0132980086952955	None
3840	his-35	C50F4.13	4.74649336464974	0.6425	0.13536308820847	0.0132980086952955	his-35 encodes an H2A histone.
18498	ZK105.1	ZK105.1	4.74374894533204	1.5025	0.316732613237995	0.0132980086952955	None
8335	ctbp-1	F49E10.5	4.7416006827041	1.2475	0.263096807065702	0.0132980086952955	tag-45 encodes a D-isomer specific 2-hydroxyacid dehydrogenase.
9259	F57G9.3	F57G9.3	4.73998200545597	1.7525	0.369727141998172	0.0132980086952955	None
14468	W02F12.8	W02F12.8	4.73903403726313	2.415	0.509597521564691	0.0132980086952955	None
13265	T14B1.1	T14B1.1	4.73207809269807	1.16	0.24513543041269	0.0132980086952955	T14B1.1 is involved in lipid storage; T14B1.1 is expressed in the muscle cell, hypodermis, and the nervous system.
8664	F53H4.3	F53H4.3	4.72773511466509	1.14	0.241130260547763	0.0132980086952955	None
12261	T02C1.1	T02C1.1	4.72689385702178	1.335	0.282426481402129	0.0132980086952955	T02C1.1 is an ortholog of human LONRF1 (LON peptidase N-terminal domain and ring finger 1), LONRF3 (LON peptidase N-terminal domain and ring finger 3) and LONRF2 (LON peptidase N-terminal domain and ring finger 2); T02C1.1 is predicted to have zinc ion binding activity, based on protein domain information.
18153	Y97E10AR.1	Y97E10AR.1	4.72471050177727	1.2575	0.266153873243022	0.0132980086952955	None
14403	W02A2.9	W02A2.9	4.72348663961321	0.6925	0.146607803268119	0.0132980086952955	None
6598	F29G6.1	F29G6.1	4.7228931546328	1.52575	0.323054100536523	0.0132980086952955	F29G6.1 is an ortholog of human SPINK5 (serine peptidase inhibitor, Kazal type 5) and SPINK6 (serine peptidase inhibitor, Kazal type 6); F29G6.1 is involved in embryo development and reproduction.
16620	wago-11	Y49F6A.1	4.71889457389993	0.5175	0.109665514220699	0.0132980086952955	wago-11 is an ortholog of members of the human AGO, PIWIL (Argonaute/PIWI) family including AGO1; wago-11 is predicted to have nucleic acid binding activity, based on protein domain information.
10313	K07A1.13	K07A1.13	4.71313299268584	1.135	0.240816459404258	0.0132980086952955	K07A1.13 is involved in lipid storage.
4927	F09C8.2	F09C8.2	4.7111758737534	0.5425	0.115151718920608	0.0132980086952955	F09C8.2 is an ortholog of human R3HCC1 (R3H domain and coiled-coil containing 1) and R3HCC1L (R3H domain and coiled-coil containing 1-like).
18875	ZK512.11	ZK512.11	4.71104677880171	1.2975	0.275416496783339	0.0132980086952955	ZK512.11 is involved in nematode larval development and reproduction.
13952	rsf-1	T24F1.3	4.70848444299301	0.785	0.166720312980583	0.0132980086952955	rsf-1 encodes the C. elegans homolog of the Ras-association domain family protein 1 (RASSF1); genetic analysis indicates that rsf-1 activity is required for embryonic development and morphogenesis and may play a role in regulating Ras signal transduction; RSF-1 physically interacts with CST-1 and CST-2, C. elegans Sterile 20 kinase homologs; an rsf-1::gfp reporter fusion is expressed in epithelia…
9006	bro-1	F56A3.5	4.70818239785757	0.7825	0.166200018154792	0.0132980086952955	bro-1 encodes an ortholog of human CBFB (OMIM:121360, mutated in acute myeloid leukemia and CBFB haploinsufficiency) and Drosophila BRO/BGB; BRO-1 is required for the normal proliferation and differentiation of seam cells, alae, and male tail rays; bro-1 mutants exhibit defective seam cell division and differentiation, and males exhibit ray loss; conversely, transgenic overexpression of BRO-1 ind…
8258	lon-1	F48E8.1	4.70432546168035	0.9575	0.203536087755712	0.0132980086952955	The lon-1 gene encodes a protein belonging to the PR-protein superfamily that is a target of DBL-1 (TGF-beta) signaling, and that regulates polyploidization and body length.
8932	F55D12.2	F55D12.2	4.70384023243078	0.63	0.133933120359073	0.0132980086952955	F55D12.2 is an ortholog of human SESTD1 (SEC14 and spectrin domains 1).
4769	sgn-1	F07H5.2	4.70364070214383	1.2775	0.271598125983079	0.0132980086952955	sgn-1 is an ortholog of human SGCZ (sarcoglycan, zeta), SGCD (sarcoglycan, delta ( dystrophin-associated glycoprotein)) and SGCG (sarcoglycan, gamma ( dystrophin-associated glycoprotein)).
1401	ceh-53	C09G12.1	4.70242627017649	0.4825	0.10260660609611	0.0132980086952955	ceh-53 encodes a paired-like homeodomain protein of the K50 class, which has no obvious function in mass RNAi assays.
9990	K02E10.4	K02E10.4	4.69787295081833	2.68	0.570470940371677	0.0132980086952955	K02E10.4 is involved in lipid storage.
18031	Y81G3A.4	Y81G3A.4	4.69530400364507	1.3625	0.290183553384884	0.0132980086952955	None
8558	F53B3.5	F53B3.5	4.69288285300212	0.945	0.201368759800911	0.0132980086952955	F53B3.5 encodes a claudin homolog that may regulate ion channels; F53B3.5 is distantly similar to mammalian voltage-dependent calcium channel gamma subunits that are known or suspected to prevent epilepsy in vivo (e.g., stargazin; MGI:1316660); F53B3.5 has no obvious function in mass RNAi assays; claudins are integral membrane proteins with four transmembrane sequences that are found in mammalian…
11515	clec-150	R06B10.3	4.69104593621551	0.9875	0.210507424874348	0.0132980086952955	None
5154	nhr-25	F11C1.6	4.69104286865828	0.8275	0.176400008093867	0.0132980086952955	nhr-25 encodes a nuclear hormone receptor orthologous to Drosophila Ftz-F1; NHR-25 is required for embryogenesis, molting, vulval and gonadal development, and hypodermal expression of acn-1; nhr-25 is expressed in gonads and loaded into embryos as a maternal transcript; nhr-25 is zygotically expressed in progeny of the E cell, and then in hypodermis and gut; the role of NHR-25 in molting may be e…
5717	ddo-2	F18E3.7	4.68888872077122	0.965	0.205805694582847	0.0132980086952955	ddo-2 encodes a D-aspartate oxidase (DASPO), paralogous to DDO-1 and DDO-3; recombinant DDO-2 protein has DASPO acvitity on acidic D-amino acid substrates (e.g., D-aspartate, D-glutamate, or N-methyl-D-aspartate/NMDA), with highest catalytic efficiency on D-aspartate or D-glutamate; ddo-2 is required for viability in mass RNAi assays.
15374	Y18D10A.4	Y18D10A.4	4.68580160200457	1.3525	0.288637914038316	0.0132980086952955	None
4224	dylt-2	D1009.5	4.68527841506447	1.1925	0.254520627027367	0.0132980086952955	dylt-2 encodes a small putative dynein light chain subunit orthologous to human CTEX1D1, LOC343521, and TCTE3; unlike its distant paralog DYLT-1, DYLT-2 does not obviously inhibit DHC-1 in vivo.
3081	inx-6	C36H8.2	4.68241757005416	1.1825	0.252540484121394	0.0132980086952955	inx-6 encodes an innexin, an integral transmembrane channel protein that is a structural component of invertebrate gap junctions; INX-6 is required for formation of pharyngeal gap junctions and thus for the electrical coupling and synchronous muscle contractions necessary for normal feeding behavior and postembryonic development; INX-6 may function redundantly with EAT-5, another C. elegans innex…
2501	gsto-1	C29E4.7	4.68199351611212	1.485	0.317172587892246	0.0132980086952955	gsto-1 encodes an experimentally verified thiol oxidoreductase and dehydroascorbate reductase, required for normal stress resistance; formally, GSTO-1 is an omega-class glutathione transferase (GST; EC 2.5.1.18), but it has little activity in vitro on classic GST substrates; GSTO-1 is expressed in postembryonic intestine; gsto-1(RNAi) induces hypersensitivity to heat-, arsenite-, juglone-, paraqu…
17792	Y73B6A.2	Y73B6A.2	4.68185050943573	0.8675	0.185289982721929	0.0132980086952955	Y73B6A.2 is an ortholog of human TTBK2 (tau tubulin kinase 2) and TTBK1 (tau tubulin kinase 1).
7841	F44E2.4	F44E2.4	4.68164450475374	0.87	0.18583213636076	0.0132980086952955	Uncharacterized protein F44E2.4
18327	ZC373.4	ZC373.4	4.6801461774896	0.5075	0.108436783970756	0.0132980086952955	ZC373.4 is an ortholog of human MYLK (myosin light chain kinase); ZC373.4 is predicted to have ATP binding activity and protein kinase activity, based on protein domain information.
12659	T06D8.3	T06D8.3	4.67835632066337	0.935	0.199856517099882	0.0132980086952955	T06D8.3 is an ortholog of human LPPR2 and LPPR5.
3015	C35E7.5	C35E7.5	4.67582326797231	1.2175	0.260381954198191	0.0132980086952955	None
9395	sdz-23	F58G4.4	4.67537330366091	1.06222222222222	0.227195167793443	0.0132980086952955	sdz-23 encodes a putatively secreted protein with a single EGF domain, with some similarity to LAG-2; sdz-23 begins to be expressed in the E blastomere of 8-cell embryos, and continues to be expressed solely in the E lineage througout embryogenesis; sdz-23 requires SKN-1 and WRM-1 for E lineage expression, and is a putative MED-1/2 target gene; sdz-23 is both activated by POP-1 (with SYS-1 as coa…
13257	cht-2	T13H5.3	4.67488963695285	1.8825	0.402683302963925	0.0132980086952955	cht-2 is an ortholog of human OVGP1 (oviductal glycoprotein 1) and members of the CHI (Chitinases) family including CHI3L1; cht-2 is predicted to have chitin binding activity and chitinase activity, based on protein domain information.
2107	C23H3.9	C23H3.9	4.67034496479942	1.37	0.293340215835393	0.0132980086952955	C23H3.9 is an ortholog of human MBLAC1 (metallo-beta-lactamase domain containing 1).
13824	pqn-71	T23F1.6	4.66887620677664	3.5125	0.752322367190156	0.0132980086952955	The protein product of this gene is predicted to contain a glutamine/asparagine (Q/N)-rich ('prion') domain, by the algorithm of Michelitsch and Weissman (as of the WS77 release of WormBase, i.e., in wormpep77).
348	B0361.9	B0361.9	4.66851748992485	0.685	0.146727521419444	0.0132980086952955	Uncharacterized protein B0361.9
12873	math-41	T08E11.4	4.66851140633271	0.885	0.189567920686564	0.0132980086952955	None
7209	ifc-1	F37B4.2	4.66757434229668	0.77	0.164967913423982	0.0132980086952955	ifc-1 encodes a nonessential intermediate filament protein; IFC-1 is predicted to function as a structural component of the cytoskeleton; IFC-1 has no function in RNAi assays.
11869	suro-1	R11A5.7	4.66594356808984	2.2525	0.482753373916637	0.0132980086952955	suro-1 is an ortholog of human CPA2 (carboxypeptidase A2 (pancreatic)), CPA4 (carboxypeptidase A4), CPA1 (carboxypeptidase A1 (pancreatic)), CPA5 (carboxypeptidase A5), CPB1 (carboxypeptidase B1 (tissue)) and CPA6 (carboxypeptidase A6); suro-1 is involved in body morphogenesis; suro-1 is predicted to have metallocarboxypeptidase activity and zinc ion binding activity, based on protein domain info…
3802	C50D2.6	C50D2.6	4.6634994781111	0.875	0.187627339534818	0.0132980086952955	None
1383	lips-7	C09E8.2	4.66324887005893	1.2575	0.269661781955058	0.0132980086952955	lips-7 is predicted to have hydrolase activity, based on protein domain information; lips-7 is expressed in the hypodermis, excretory system, head, rectum, and the vulva.
2140	C24A8.6	C24A8.6	4.66253221528371	0.6175	0.132438763205934	0.0132980086952955	C24A8.6 is an ortholog of members of the human TAAR (Trace amine receptors) family including TAAR9 and DRD (Dopamine receptors) family including DRD4; C24A8.6 is predicted to have G-protein coupled receptor activity, based on protein domain information.
3885	C51E3.10	C51E3.10	4.66157590540699	1.405	0.301400219262832	0.0132980086952955	None
11202	cutl-9	M28.1	4.66146264509009	0.615	0.131932838858588	0.0132980086952955	None
18324	cbs-1	ZC373.1	4.66136706735369	0.5425	0.116382166896799	0.0132980086952955	cbs-1 encodes an ortholog of human CYSTATHIONINE-BETA-SYNTHASE (CBS), which when mutated leads to homocystinuria (OMIM:236200).
15229	Y116F11A.6	Y116F11A.6	4.65663190140835	1.895	0.406946488389361	0.0132980086952955	None
15610	flp-14	Y37D8A.15	4.65314012746352	0.595	0.127870638687243	0.0132980086952955	flp-14 encodes four copies of a single FMRFamide-related short peptide neurotransmitter; FLP-14 can increase pharyngeal action potential frequency, although its exact role in C. elegans neurotransmission is not yet clear.
13919	ztf-18	T24C4.7	4.65153871000884	0.4975	0.106953855705751	0.0132980086952955	ztf-18 is involved in embryo development; ztf-18 is predicted to have nucleic acid binding activity, based on protein domain information; ztf-18 is expressed in the pharynx, hypodermis, nervous system, intestine, and the body wall musculature.
6251	F25H5.7	F25H5.7	4.64634077750302	0.7125	0.153346479330537	0.0132980086952955	F25H5.7 is predicted to have protein tyrosine phosphatase activity, based on protein domain information.
1268	mab-5	C08C3.3	4.64471989865443	1.45	0.312182441920785	0.0132980086952955	mab-5 encodes a homeodomain transcription factor related to the Antennapedia, Ultrabithorax, and abdominal-A family of homeodomain proteins; during postembryonic development, mab-5 is required cell autonomously for specification of posterior cell fates, including hypodermal and neuronal fates, programmed cell deaths, cell proliferation and migration, and fate specification of the male-specific co…
6296	F26C11.3	F26C11.3	4.64309032159388	0.6125	0.131916451668281	0.0132980086952955	F26C11.3 is involved in apoptotic process and oogenesis; F26C11.3 is expressed in the coelomocyte and the intestine.
18483	col-97	ZK1010.7	4.64144948310621	2.705	0.582792080328692	0.0132980086952955	col-97 encodes a cuticular collagen; loss of col-97 activity via large-scale RNAi screens results in defects in body morphology and locomotion.
3519	C46C11.3	C46C11.3	4.63894925048402	1.0575	0.227961105608056	0.0132980086952955	C46C11.3 is an ortholog of human NKG7 (natural killer cell granule protein 7), LIM2 (lens intrinsic membrane protein 2), PMP22 (peripheral myelin protein 22), EMP1 (epithelial membrane protein 1), EMP2 (epithelial membrane protein 2), EMP3 (epithelial membrane protein 3), GSG1L (GSG1-like), GSG1 (germ cell associated 1), TMEM202 (transmembrane protein 202) and CLDND2 (claudin domain containing 2).
18326	ZC373.3	ZC373.3	4.63891284804472	0.8215	0.177088905722007	0.0132980086952955	ZC373.3 is predicted to have ATP binding activity and protein kinase activity, based on protein domain information.
8817	F54F7.2	F54F7.2	4.6372676959648	0.9875	0.212948672525265	0.0132980086952955	F54F7.2 is involved in lipid storage.
18662	ZK1320.9	ZK1320.9	4.63293640504947	0.4975	0.10738330002928	0.0132980086952955	ZK1320.9 is predicted to have catalytic activity, based on protein domain information.
5235	fbxb-92	F12E12.9	4.63256533733089	2.36	0.509436959470872	0.0132980086952955	None
1425	mks-5	C09G5.8	4.63164057450048	1.3475	0.29093362887843	0.0132980086952955	mks-5 is an ortholog of human RPGRIP1L (RPGRIP1-like); mks-5 is involved in lipid storage, nonmotile primary cilium assembly, protein localization to ciliary transition zone and receptor localization to nonmotile primary cilium; mks-5 is expressed in certain sensory neurons and the ciliated neurons.
15763	mksr-2	Y38F2AL.2	4.63030720583743	0.8175	0.176554160157965	0.0132980086952955	mkrs-2 encodes an ortholog of human B9D2 (OMIM:611951), paralogous to MKRS-1 and MKS-1; MKRS-2 is required for fully normal foraging behavior, and is redundantly required with NPH-4 for roughly normal foraging, and with both NPH-1 and NPH-4 for cilia formation; MKRS-2 is expressed in most ciliated cells, including amphid, phasmid, and labial-quadrant neurons, in a DAF-19-dependent manner; MKRS-2 …
17737	Y71H2AM.14	Y71H2AM.14	4.62981156235526	1.3525	0.292128520088615	0.0132980086952955	Y71H2AM.14 is predicted to have galactoside 2-alpha-L-fucosyltransferase activity, based on protein domain information.
15284	Y11D7A.5	Y11D7A.5	4.62872474435003	1.915	0.413720863902635	0.0132980086952955	None
3832	fkb-5	C50F2.6	4.62663943544591	0.8075	0.174532727537298	0.0132980086952955	fkb-5 encodes a peptidyl-prolyl cis-trans isomerase (PPIase) that is one of eight FK506 binding proteins encoded by the C. elegans genome; although fkb-5 single mutants show no obvious defects, animals doubly and triply mutant for fkb-5 and other FKB secretory pathway mutants display synthetic, cold-sensitive body morphology and molting defects as well as L1 larval lethality; an fkb-5::lacZ repor…
10522	cul-6	K08E7.7	4.62581184716628	0.3675	0.0794455140290945	0.0132980086952955	cul-6 encodes a member of the cullin family that may physically interact with SKR-3.
3605	cdd-1	C47D2.2	4.62042652359985	0.725	0.156911920641288	0.0132980086952955	cdd-1 encodes a cytidine deaminase that contains a zinc-binding region; CDD-1 exhibits deoxycytidine deaminase activity when expressed in vitro, and is able to bind AU-rich RNA sequences in vitro; a cdd-1::lacZ reporter fusion is expressed at highest levels in early larvae and is seen predominantly in the intestine and pharynx.
13263	ric-3	T14A8.1	4.62040534706535	1.745	0.377672491680484	0.0132980086952955	ric-3 encodes a novel, highly charged protein with two transmembrane domains and extensive coiled-coil domains; RIC-3 is necessary for the maturation and function of at least four nicotinic acetylcholine receptors; specifically, it is needed for assembly or trafficking of the DEG-3 nicotinic acetylcholine receptor; RIC-3 levels and hence, activity, are regulated by BATH-42, a BTB and MATH domain-…
18742	cutl-8	ZK265.8	4.61905960771619	0.76	0.16453565542441	0.0132980086952955	None
12430	frm-2	T04C9.6	4.61766544170086	0.945	0.204648866820443	0.0132980086952955	frm-2 is an ortholog of human EPB41L4B (erythrocyte membrane protein band 4.1 like 4B) and EPB41L5 (erythrocyte membrane protein band 4.1 like 5); frm-2 is predicted to have cytoskeletal protein binding activity, based on protein domain information; frm-2 is expressed in the nervous system, seam cell, intestine, and the uterine seam cell.
13239	cav-1	T13F2.8	4.61559028271289	1.49	0.322818948116042	0.0132980086952955	cav-1 encodes one of two C. elegans caveolin orthologs; cav-1 is required for viability and Ras/MAP-kinase-dependent progression through the meiotic cell cycle; CAV-1 is expressed in the adult germ line and during embryonic development; CAV-1::GFP localizes to cortical granules that function to secrete chondroitin and mucin-like proteoglycans to the extracellular space following fertilization.
6303	atgp-1	F26D10.9	4.61485694695935	0.5125	0.111054363307551	0.0132980086952955	atgp-1 encodes a predicted amino acid transporter glycoprotein subunit; when co-expressed in Xenopus oocytes with the AAT-1 or AAT-3 catalytic subunit, ATGP-1 is not able to facilitate amino acid uptake, even though ATGP-1 is able to covalently associate with AAT-1 or AAT-3 in the Xenopus expression system; however, when co-expressed with AAT-9, ATGP-1 is able to enhance the activity of this cata…
14657	W05H12.2	W05H12.2	4.61380666924068	0.5425	0.117581866534794	0.0132980086952955	W05H12.2 is an ortholog of human EXD2 (exonuclease 3'-5' domain containing 2); W05H12.2 is predicted to have 3'-5' exonuclease activity and nucleic acid binding activity, based on protein domain information.
13687	T22B7.4	T22B7.4	4.61359813531731	0.7	0.151725395118718	0.0132980086952955	T22B7.4 is an ortholog of human CCDC101 (coiled-coil domain containing 101).
17730	pbo-1	Y71H2AL.1	4.6079155372818	0.805	0.174699382722381	0.0132980086952955	pbo-1 encodes a calcium binding protein with homology to calcineurin; pbo-1 was identified in screens for mutations that disrupt the normal defecation cycle; a pbo-1 mutation results in weak or absent posterior body contractions, the first step in the defecation cycle; pbo-1 mutant animals are also slow growing and constipated.
9346	F58E2.3	F58E2.3	4.60709025662851	0.5825	0.126435552062806	0.0132980086952955	This gene encodes a protein containing an F-box, a motif predicted to mediate protein-protein interactions either with homologs of yeast Skp-1p or with other proteins; this gene's encoded protein also contains an FTH/DUF38 motif, which may also mediate protein-protein interaction.
17215	hhat-2	Y57G11C.17	4.60416537046237	1.2725	0.276380168306642	0.0132980086952955	hhat-2 encodes a putative protein-cysteine N-palmitoyltransferase ('hedgehog acyltransferase') orthologous to human HHAT (OMIM: 605743) and GUP1 (HHATL; OMIM:608116), and paralogous to HHAT-1; HHAT-2 is required for normal larval development and fat accumulation in mass RNAi assays; however, because C. elegans has no HEDGEHOG homolog, the substrate and function of HHAT-2 in vivo are unclear.
2778	elt-2	C33D3.1	4.60363628105989	0.49	0.106437600645372	0.0132980086952955	elt-2 encodes a GATA-type transcription factor most similar to the vertebrate GATA4-6 transcription factors required for cardiac and endoderm development (OMIM:601656, 600576); in C. elegans, ELT-2 is required redundantly with ELT-7 for initiating and maintaining terminal differentiation of the intestine and for regulating the intestinal innate immune respone; ELT-2 is expressed solely in the int…
15697	Y38A10A.2	Y38A10A.2	4.59514876743023	2.155	0.468972847032579	0.0132980086952955	Y38A10A.2 is involved in nematode larval development.
17080	mrps-25	Y55F3AM.1	4.59337623557779	0.4375	0.0952458447908889	0.0132980086952955	mrps-25 is an ortholog of human MRPS25 (mitochondrial ribosomal protein S25); mrps-25 is involved in embryo development.
1302	C08F1.8	C08F1.8	4.59145058082449	1.94	0.422524421389206	0.0132980086952955	None
16855	gst-26	Y53F4B.29	4.58804296505135	0.5	0.108978927139233	0.0132980086952955	gst-26 is an ortholog of human HPGDS (hematopoietic prostaglandin D synthase).
5108	F10G8.1	F10G8.1	4.58616641287335	0.83	0.18097904115956	0.0132980086952955	F10G8.1 is predicted to have protein tyrosine phosphatase activity, based on protein domain information.
4936	F09E10.6	F09E10.6	4.57232956095766	1.805	0.394765945003743	0.0132980086952955	F09E10.6 is expressed in the pharynx and the head.
17922	Y75B7B.1	Y75B7B.1	4.57213534330735	0.899166666666667	0.196662303092768	0.0132980086952955	None
18484	ZK1010.8	ZK1010.8	4.57068135640175	1.1925	0.260902020292832	0.0132980086952955	None
15762	nsy-4	Y38F2AL.1	4.5706812127171	0.68	0.148774322328152	0.0132980086952955	nsy-4 encodes a member of the PMP22/EMP/claudin/calcium channel gamma subunit family; nsy-4 is worm-specific, with obvious homologs only in C. elegans; nsy-4 functions with nsy-5 to induce the AWC chemosensory neuron ON fate by regulating the activity of the UNC-2/UNC-36 calcium channel.
2430	pdl-1	C27H5.1	4.56982782437819	1.385	0.303074875734176	0.0132980086952955	pdl-1 encodes the C. elegans ortholog of the mammalian cGMP phosphodiesterase delta subunit (PDE6D); genetic analyses indicate that pdl-1 plays a role in regulating gustatory plasticity.
2610	C30H6.12	C30H6.12	4.56590717806019	1.05	0.229965253136418	0.0132980086952955	None
18776	msp-59	ZK354.11	4.56339962374451	0.8475	0.185716805425114	0.0132980086952955	msp-59 encodes a member of the major sperm protein family.
10807	K11E4.2	K11E4.2	4.5617263116278	0.7875	0.172632013891905	0.0132980086952955	None
17829	Y73B6BL.44	Y73B6BL.44	4.5589737665449	0.8225	0.180413409271128	0.0132980086952955	None
15332	Y17G7B.22	Y17G7B.22	4.55762143294905	1.495	0.328021978568029	0.0132980086952955	None
18227	grl-21	ZC168.5	4.55737233308472	1.685	0.369730598434446	0.0132980086952955	grl-21 encodes a hedgehog-like protein, with an N-terminal signal sequence, a central proline-rich low-complexity region, and a C-terminal Ground-like (Grl) domain; GRL-21 is expressed in arcade cells and hypodermis; the Grl domain is predicted to form a cysteine-crosslinked protein involved in intercellular signalling, and it has subtle similarity to the N-terminal Hedge domain of HEDGEHOG prote…
10849	K12B6.9	K12B6.9	4.55599604161955	0.54	0.118525124927027	0.0132980086952955	None
1021	C05G5.1	C05G5.1	4.55498472283806	1.0075	0.221186252271832	0.0132980086952955	C05G5.1 is an ortholog of human MFSD7 (major facilitator superfamily domain containing 7); C05G5.1 is expressed in the intestine, ventral nerve cord, nerve ring, head neurons, and the tail neurons; C05G5.1 is localized to the plasma membrane.
5267	F13B12.4	F13B12.4	4.55012957000945	2.5075	0.551083207943635	0.0132980086952955	Putative pyridoxal-phosphate dependent protein F13B12.4
12834	spp-3	T08A9.7	4.54845979950482	0.49	0.107728774486112	0.0132980086952955	spp-3 encodes an antimicrobial peptide that belongs to the SPP-protein family, called caenopores, with structural similarity to saposin-like proteins (SAPLIPs), the amoebapores and the mammalian NK-lysin and granulysin; caenopores are part of the worm's innate immune system and interact with and eliminate bacteria via membrane pore-forming activity; C. elegans has at least 33 putative SPP protein…
16718	Y51A2D.14	Y51A2D.14	4.54781578702852	1.3125	0.288600080008423	0.0132980086952955	None
9604	H03A11.2	H03A11.2	4.54677360840914	0.625	0.137460109921479	0.0132980086952955	H03A11.2 is an ortholog of human FAM154A and FAM154B; H03A11.2 is expressed in the nervous system.
15491	Y26D4A.20	Y26D4A.20	4.54621978882091	0.7775	0.17102120797412	0.0132980086952955	None
2436	dyf-13	C27H5.7	4.54540259902819	1.2375	0.272253111366764	0.0132980086952955	dyf-13 encodes a ciliary protein, belonging to a conserved but unfamiliar protein family, that is required for cilial function and formation, undergoes IFT, and might represent a core component of the OSM-3 kinesin IFT pathway; dyf-13 is expressed in AWB neurons; dyf-13 mutations affect morphology of the amphid and phasmid neurons, chemotaxis, dauer formation, growth, male mating, and hermaphrodi…
9219	F57C2.4	F57C2.4	4.53872236655262	0.6625	0.145966187507345	0.0132980086952955	None
10133	K04A8.10	K04A8.10	4.53716561853049	1.2775	0.281563448947619	0.0132980086952955	K04A8.10 is an ortholog of human UGT3A2 (UDP glycosyltransferase 3 family, polypeptide A2) and UGT3A1 (UDP glycosyltransferase 3 family, polypeptide A1); K04A8.10 is predicted to have transferase activity, transferring hexosyl groups, based on protein domain information.
6372	nep-12	F26G1.6	4.53700816680097	1.22	0.268899670255656	0.0132980086952955	F26G1.6 encodes a neprilysin; neprilysins are thermolysin-like zinc metallopeptidases, found on the outer surface of animal cells, that negatively regulate small signalling peptides (e.g., enkephalin, tachykinin, insulin, and natriuretic peptides) by cleaving them; while F26G1.6 has no clear orthologs in other organisms, it falls into a group of proteins that includes the classical neprilysins fo…
10250	cah-3	K05G3.3	4.53607345002304	0.6875	0.15156280152309	0.0132980086952955	cah-3 encodes a putative carbonic anhydrase, closely similar to its paralog CAH-5; cah-3 is expressed in intestine and head (including neurons) of L3 larvae through adults, and its transcription is moderately stimulated by DBL-1 and SMA-2; CAH-3 is bound by CKU-80 in two-hybrid assays, but has no obvious function in mass RNAi assays.
8729	F54C9.3	F54C9.3	4.53441731384246	0.785	0.173120369314838	0.0132980086952955	None
5181	gba-3	F11E6.1	4.52679373620075	0.5875	0.129782807487287	0.0132980086952955	gab-3 is homologous to to the human gene GLUCOCEREBROSIDASE (GBA; OMIM:606463), which when mutated leads to Gaucher disease.
1505	C10G8.8	C10G8.8	4.52356885919031	0.6675	0.14756048172979	0.0132980086952955	C10G8.8 is an ortholog of human C15orf52 (chromosome 15 open reading frame 52) and CCDC9 (coiled-coil domain containing 9); C10G8.8 is expressed in the pharynx, anal depressor muscle, hypodermis, tail, reproductive system, intestine, rectal epithelium, excretory cell, and the body wall musculature.
11160	M162.5	M162.5	4.5230831537947	1.3225	0.2923890530048	0.0132980086952955	M162.5 is an ortholog of members of the human SLC (Solute carriers) family including SLC37A1.
13675	T22B11.4	T22B11.4	4.52214256934049	0.615	0.135997481408396	0.0132980086952955	T22B11.4 is expressed in the pharynx.
13679	sup-12	T22B2.4	4.52010359780492	0.805	0.178093263258596	0.0132980086952955	sup-12 encodes an RNA-binding protein that contains a conserved RNA recognition motif (RRM); during development, SUP-12 functions as a muscle-specific splicing factor to regulate alternative pre-mRNA processing of unc-60 and egl-15 transcripts; in vitro, SUP-12 can bind intronic regions of the unc-60 and egl-15 pre-mRNAs; specifically, SUP-12 binds the unc-60 intron 1A cooperatively with ASD-2, w…
5807	twk-11	F20A1.7	4.51381137194556	1.0325	0.228742389727945	0.0132980086952955	twk-11 encodes one of more than 40 TWK (two-P domain K+) potassium channels in C. elegans that contain two pore regions and four transmembrane domains; orthologous to C. briggsae CBG19123 with some similarity to Drosophila CG6004.
6979	syd-1	F35D2.5	4.51244732205474	1.515	0.335737991354577	0.0132980086952955	syd-1 encodes a protein that contains a Rho-GTPase-like activating domain as well as PDZ and C2 domains; during neuronal development, SYD-1 is required cell autonomously to positively regulate synaptogenesis; in regulating synapse development, SYD-1 functions as a positive regulator of SYD-2/liprin through direct interaction with ELKS-1, a pre-synaptic protein also required for synapse developmen…
17174	btb-14	Y57A10B.3	4.50862493438812	0.7325	0.162466386239646	0.0132980086952955	BTB/POZ domain-containing protein Y57A10B.3
14901	sgk-1	W10G6.2	4.50841565867752	0.64	0.141956742335451	0.0132980086952955	sgk-1 encodes a serine/threonine protein kinase that is orthologous to the mammalian serum- and glucocorticoid-inducible kinases (SGKs); in C. elegans, sgk-1 activity is required for normal egg laying, generation time, stress response, and adult life span; SGK-1 forms a complex with the AKT kinases with which it functions in parallel to mediate certain aspects of DAF-2/insulin-signaling; SGK-1 ph…
15446	lys-3	Y22F5A.6	4.50478778180971	1.6075	0.356842559041532	0.0132980086952955	lys-3 encodes one of a family of ten C. elegans lysozyme genes that are homologous to lysozymes in the amoeboid protozoan Entamoeba histolytica; lys-3 expression is upregulated in response to stress; lys-3 activity is required for the stress response to copper ion, and in response to copper ion stress, lys-3 expression is upregulated in a kgb-1-dependent manner.
8469	hsp-17	F52E1.7	4.5026762236086	0.8375	0.186000493575085	0.0132980086952955	hsp-17 encodes a heat shock protein that is a member of the hsp16/hsp20/alpha-crystallin family of heat shock proteins; by homology, HSP-17 is predicted to function as a molecular chaperone that protects cells from heat-induced protein aggregation and denaturation.
15720	trpl-4	Y38C1AB.6	4.4996754425881	1.08	0.240017310977169	0.0132980086952955	trpl-4 is an ortholog of human TRPM1 (transient receptor potential cation channel M1) and TRPM6 (transient receptor potential cation channel M6).
6367	F26G1.10	F26G1.10	4.49591976050092	1.11944444444444	0.248991197369528	0.0132980086952955	None
3998	ptr-6	C54A12.1	4.49448452359231	1.33	0.295918251140616	0.0132980086952955	ptr-6 encodes an ortholog of Drosophila and human PTCHD3, which defines one of seven paralogous families of sterol sensing domain (SSD) proteins; PTR-6 is weakly required for normal molting from L4 to adult stages; however, PTR-6 in conjunction with PTR-1 and PTR-10 is strongly required for both molting and viability, with triple ptr-1/-6/-10 RNAi animals showing pronounced molting defects and le…
7744	F43D2.2	F43D2.2	4.48992695767829	0.7875	0.175392608259091	0.0132980086952955	None
9241	F57F5.3	F57F5.3	4.48677989100123	0.66	0.147098813856171	0.0132980086952955	None
14103	T26H5.10	T26H5.10	4.48220262027947	1.1575	0.258243568633635	0.0132980086952955	None
4839	F08F3.4	F08F3.4	4.48150126276999	0.6575	0.146714228435496	0.0132980086952955	F08F3.4 is involved in innate immune response; F08F3.4 is predicted to have catalytic activity and coenzyme binding activity, based on protein domain information.
3671	ptp-1	C48D5.2	4.47927586076179	0.795	0.177484045348525	0.0132980086952955	ptp-1 encodes a non-receptor tyrosine phosphatase containing Band 4.1 and PDZ domains that may function in linking cytoplasmic proteins and signaling molecules to sites on the plasma membrane; by homology, PTP-1 is predicted to function in cell signaling.
17122	sdz-33	Y56A3A.14	4.47844953048952	1.9075	0.425928658347859	0.0132980086952955	This gene encodes a protein containing an F-box, a motif predicted to mediate protein-protein interactions either with homologs of yeast Skp-1p or with other proteins.
475	tes-1	B0496.8	4.47702410327764	0.7475	0.16696358624756	0.0132980086952955	tes-1 encodes an ortholog of Drosophila CG6522-PA and of human LMCD1 and TESTIN; TES-1 is dispensable for Wnt-directed planar cell polarity and the fully asymmetrical division of B.a versus B.p cells.
3898	glb-12	C52A11.2	4.473959868326	0.895	0.200046497139206	0.0132980086952955	glb-12 encodes a globin; glb-12 transcription is higher in L3 and dauers than in young adults; in mass RNAi assays, glb-12 is required for embryonic viability, larval growth, and normal body shape, locomotion, and egg laying.
16447	Y47H10A.4	Y47H10A.4	4.47202819730013	0.7375	0.164913987001523	0.0132980086952955	Y47H10A.4 is an ortholog of human DXO (decapping exoribonuclease).
12102	osm-6	R31.3	4.47101363735878	1.5525	0.347236695282622	0.0132980086952955	osm-6 encodes a novel protein that is orthologous to the IFT52 component of the intraflagellar transport particle; osm-6 activity is required cell autonomously for proper sensory cilium structure and thus for normal ciliated sensory neuron function; OSM-6 is a component of the intraflagellar transport particle subcomplex B, and OSM-6::GFP reporter fusions are expressed exclusively in ciliated sen…
11940	R12C12.10	R12C12.10	4.47060699999864	1.635	0.365722149140038	0.0132980086952955	None
7532	F41C3.5	F41C3.5	4.46885602824265	0.7775	0.173981885987441	0.0132980086952955	F41C3.5 encodes a serine carboxypeptidase that is related to human cathepsin A (CTSA, OMIM:256540, mutations are associated with galactosialidosis: beta-galactosidase and alpha-neuraminidase deficiency); microarray experiments have shown that F41C3.5 mRNA levels are reduced in a lin-14 loss-of-function mutant background, suggesting that F41C3.5 expression is positively regulated by LIN-14; large-…
19126	ZK813.5	ZK813.5	4.46591845027079	1.6275	0.364426717174228	0.0132980086952955	ZK813.5 is an ortholog of human CMKLR1 (chemerin chemokine-like receptor 1), CX3CR1 (chemokine (C-X3-C motif) receptor 1), XCR1 (chemokine (C motif) receptor 1) and RGR (retinal G protein coupled receptor) and members of the CXCR (Chemokine (C-X-C motif) receptors) family including CXCR4, CCR (Chemokine (C-C motif) receptors) family including CCR9, ACKR (Atypical chemokine receptors) family inclu…
8882	F55B11.7	F55B11.7	4.46401615264441	0.7025	0.157369502255016	0.0132980086952955	non-coding Transcript Isoform
518	srd-14	B0547.3	4.46224101992498	0.625	0.140064150997049	0.0132980086952955	None
15235	Y116F11B.2	Y116F11B.2	4.46100677815127	0.5475	0.122730143043382	0.0132980086952955	None
2965	C35B1.5	C35B1.5	4.4604055208524	0.9	0.201775375757316	0.0132980086952955	C35B1.5 is an ortholog of human NXNL1 (nucleoredoxin-like 1) and NXNL2 (nucleoredoxin-like 2).
10831	K11H12.5	K11H12.5	4.45944188846939	1	0.224243307797252	0.0132980086952955	None
3934	fbxb-97	C52E2.6	4.45725027289943	0.635	0.142464515367438	0.0132980086952955	None
4692	scav-6	F07A5.3	4.45645004190831	0.4975	0.111635942358049	0.0132980086952955	scav-6 is an ortholog of human CD36 (CD36 molecule (thrombospondin receptor)) and SCARB2 (scavenger receptor class B, member 2).
8119	haly-1	F47B10.2	4.45621748303128	0.6975	0.1565228812678	0.0132980086952955	haly-1 encodes a histidine ammonia lyase orthologous to the human gene HISTIDASE (HAL; OMIM:235800); HALY-1 is required in C. elegans for conversion of histidine to urocanic acid via reductive deamination; loss-of-function mutations in haly-1 result in protection against zinc and nickel toxicity owing to increased levels of metal-chelating histidine; genetic studies suggest that haly-1 functions …
3217	C40A11.10	C40A11.10	4.45393717364906	1.2175	0.273353653752264	0.0132980086952955	None
6736	ift-81	F32A6.2	4.44879288770168	1.08	0.242762481253189	0.0132980086952955	ift-81 encodes an ortholog of the intraflagellar transport component IFT-81 in Chlamydomonas; ift-81 along with ift-74 is involved in growth, chemotaxis, intraflagellar transport and the morphogenesis of cilia; ift-81 binds ift-74 in protein binding assays and co-localizes with ift-74 to the transition zone of cilia in neurons, indicating that ift-81 may form a complex with ift-74.
9088	F56D5.3	F56D5.3	4.44871669922443	1.6675	0.374827194613383	0.0132980086952955	F56D5.3 is predicted to have FMN binding activity and oxidoreductase activity, based on protein domain information.
16925	col-48	Y54E10BL.2	4.44636300182483	0.7925	0.178235560091416	0.0132980086952955	col-48 encodes a cuticle collagen.
603	nrfl-1	C01F6.6	4.44636111703868	0.4	0.0899612041107456	0.0132980086952955	tag-60 encodes, by alternative splicing, five isoforms of an ortholog of Drosophila SIP1 that maintains epithelial integrity via regulation of Moesin activity, and of the human SLC9A3R1 (OMIM:604990), SLC9A3R2 (OMIM:606553), PDZK1 (OMIM:603831), and PDZD3(OMIM:607146) proteins that regulate plasma membrane exchanger activity; in C. elegans, tag-60 is required for normally short lifespan and for n…
12185	got-1.2	T01C8.5	4.44534212875556	0.51	0.114726827593531	0.0132980086952955	got-1.2 is an ortholog of human GOT1 (glutamic-oxaloacetic transaminase 1, soluble); got-1.2 is predicted to have pyridoxal phosphate binding activity and transaminase activity, based on protein domain information; got-1.2 is expressed in the pharynx, hypodermis, nervous system, head, tail, reproductive system, intestine, rectal gland cell, excretory cell, and the body wall musculature.
9213	hlh-19	F57C12.3	4.44502740906746	0.6825	0.153542360303057	0.0132980086952955	hlh-19 is an ortholog of human SCX (scleraxis bHLH transcription factor) and TCF15 (transcription factor 15 (basic helix-loop-helix)); hlh-19 is predicted to have protein dimerization activity, based on protein domain information.
11573	gana-1	R07B7.11	4.44050561976735	0.9125	0.205494616635078	0.0132980086952955	gana-1 encodes a protein with homology to both human alpha-galactosidase (alpha-GAL) and alpha-N-acetylgalactosaminidase (alpha-NAGA) enzymes; these dual enzymatic activities were detected in mixed culture homogenates; immunofluorescence studies show cytoplasmic expression of GANA-1 in body wall muscle and intestinal cells and in coelomocytes. the human gene alpha-galactosidase B (GALB; OMIM:1041…
16858	gst-28	Y53F4B.31	4.43743559008039	1.07	0.241130260547763	0.0132980086952955	gst-28 is an ortholog of human HPGDS (hematopoietic prostaglandin D synthase).
17081	Y55F3AM.10	Y55F3AM.10	4.43557414680386	0.6075	0.136960848786114	0.0132980086952955	abhd-14 is an ortholog of human ABHD14A (abhydrolase domain containing 14A) and ABHD14B (abhydrolase domain containing 14B).
18576	dve-1	ZK1193.5	4.43506765182785	0.7975	0.179816873745166	0.0132980086952955	dve-1 encodes, by alternative splicing, three proteins with a COMPASS (CMP) domain and two homeodomains; dve-1 interacts with two or more components of the EGF/RAS signalling pathway, and is required for such signalling in vulval development; the CMP domain is found in the N-terminus of SATB-class CUT homeodomain proteins (e.g. human SATB1), and in Drosophila DEFECTIVE PROVENTRICULUS (DVE), to wh…
13302	tag-18	T14G12.3	4.43506681671343	0.6175	0.139231273286113	0.0132980086952955	tag-18 is expressed in the anal depressor muscle, reproductive system, and the body wall musculature.
674	C02B10.3	C02B10.3	4.43407237339928	0.47	0.105997367751507	0.0132980086952955	C02B10.3 encodes a predicted secreted protein containing EGF-like repeats.
2508	nhr-43	C29E6.5	4.43324553615016	0.92	0.207522906750373	0.0132980086952955	nhr-43 is predicted to encode a nuclear hormone receptor (NHR); the primary sequence of nhr-43 reveals that it has a leucine instead of a methionine that is conserved within the NHR superfamily at the carboxyl boundary of the DNA-binding domain.
16812	Y53C10A.2	Y53C10A.2	4.43274086714853	0.96	0.216570295618824	0.0132980086952955	None
12404	T04B2.3	T04B2.3	4.43069211852616	0.5925	0.133726285679514	0.0132980086952955	None
11685	cyp-33C8	R08F11.3	4.4305556254409	0.59	0.133166142100131	0.0132980086952955	cyp-33C8 is an ortholog of members of the human CYP2 (Cytochrome P4502) family including CYP2D6; cyp-33C8 is predicted to have heme binding activity, iron ion binding activity, and oxidoreductase activity, acting on paired donors, with incorporation or reduction of molecular oxygen, based on protein domain information.
16039	Y41D4A.5	Y41D4A.5	4.42956849761583	0.555	0.125294371291182	0.0132980086952955	Y41D4A.5 is an ortholog of human PTPN18 (protein tyrosine phosphatase, non-receptor type 18 (brain-derived)), PTPN12 (protein tyrosine phosphatase, non-receptor type 12) and PTPN22 (protein tyrosine phosphatase, non-receptor type 22 (lymphoid)); Y41D4A.5 is involved in engulfment of apoptotic cell and gonad development; Y41D4A.5 is predicted to have protein tyrosine phosphatase activity, based on…
17123	fbxb-24	Y56A3A.15	4.42820665918923	1.685	0.380515212970777	0.0132980086952955	This gene encodes a protein containing an F-box, a motif predicted to mediate protein-protein interactions either with homologs of yeast Skp-1p or with other proteins.
10873	vab-8	K12F2.2	4.42448095822648	0.5575	0.12600348046779	0.0132980086952955	The vab-8 gene encodes a novel protein containing an atypical kinesin-like motor domain that is required for many posteriorly-directed cell migrations, as well as axonal outgrowth and pathfinding; vab-8 encodes two protein isoforms: VAB-8S, a novel protein expressed in migrating cells, and VAB-8L, which contains a kinesin-related domain, is expressed in neurons and functions in growth cone migrat…
5310	F13E9.13	F13E9.13	4.42396713007409	1.3425	0.303460663365624	0.0132980086952955	F13E9.13 is predicted to have catalytic activity, based on protein domain information.
18473	ZC84.6	ZC84.6	4.4215164143742	1.725	0.390137644721183	0.0132980086952955	ZC84.6 is an ortholog of human AMBP (alpha-1-microglobulin/bikunin precursor), LRP11 (low density lipoprotein receptor-related protein 11) and members of the WFDC (WAP four-disulfide core domain containing) family including WFIKKN1; ZC84.6 is predicted to have serine-type endopeptidase inhibitor activity, based on protein domain information.
8274	F48F7.5	F48F7.5	4.4185923378128	0.755	0.170868897213931	0.0132980086952955	None
13908	T24C12.4	T24C12.4	4.41851583428494	1.765	0.399455397738919	0.0132980086952955	None
10872	myo-3	K12F2.1	4.4145929457282	1.005	0.227654058336793	0.0132980086952955	myo-3 encodes MHC A, the minor isoform of MHC (myosin heavy chain) that is essential for thick filament formation, and for viability, movement, and embryonic elongation; expressed in body muscle, the somatic sheath cell covering the hermaphrodite gonad, and also expressed in enteric muscle, vulval muscles of the hermaphrodite and the diagonal muscles of the male tail.
16769	fbxb-43	Y51H7BR.2	4.41427405376422	2.105	0.476862101075258	0.0132980086952955	None
16851	Y53F4B.25	Y53F4B.25	4.40537359814617	1.99	0.451721052860855	0.0132980086952955	Y53F4B.25 is an ortholog of human FAM46C (family with sequence similarity 46, member C), FAM46D (family with sequence similarity 46, member D), FAM46B (family with sequence similarity 46, member B) and FAM46A (family with sequence similarity 46, member A).
6769	best-13	F32B6.9	4.40420000255887	0.5775	0.131124835308221	0.0132980086952955	best-13 is an ortholog of members of the human BEST (Bestrophins) family including BEST4; best-13 is expressed in the nervous system, reproductive system, intestine, rectal epithelium, and the excretory cell.
7578	F41E7.9	F41E7.9	4.40375314182378	2.41825	0.549133868797763	0.0132980086952955	F41E7.9 is expressed in the hypodermis and the nervous system.
3445	sym-1	C44H4.3	4.40238671582384	1.1575	0.262925561682145	0.0132980086952955	sym-1 encodes a protein containing 15 contiguous leucine-rich repeats (LRRs) that functionally overlaps with sym-5 and interacts with mec-8 with respect to embryonic viability and attachment of body muscle to the extracellular cuticle; expression begins at the time of embryonic elongation and SYM-1 is secreted from the apical hypodermal surface of the embryo; microarray analyses indicate that sym…
4395	ptb-1	D2089.4	4.40195964387594	0.54	0.122672637572054	0.0132980086952955	ptb-1 encodes the C. elegans ortholog of the polypyrimidine tract binding protein PTB.
1978	C18A11.6	C18A11.6	4.39849084893022	0.6775	0.154030103339826	0.0132980086952955	None
13006	cyp-13A5	T10B9.2	4.39734192866225	1.41	0.32064825134691	0.0132980086952955	cyp-13A5 encodes one of ~80 C. elegans cytochrome P450s: membrane-associated, heme-containing NADPH-dependent monooxygenases that catalyze the oxidative metabolism of a variety of exogenous compounds and endogenous substrates; loss of cyp-13A5 activity in large-scale RNAi screens results in uncoordinated locomotion, decreased and/or slow growth, and cadmium hypersensitivity.
13896	nhr-221	T24A6.8	4.3953615591149	0.9125	0.207605219212899	0.0132980086952955	nhr-221 is an ortholog of human HNF4G (hepatocyte nuclear factor 4, gamma) and HNF4A (hepatocyte nuclear factor 4, alpha); nhr-221 is predicted to have sequence-specific DNA binding activity, transcription factor activity, sequence-specific DNA binding, and zinc ion binding activity, based on protein domain information.
1092	C06C3.9	C06C3.9	4.38725273936764	0.855	0.194882777627084	0.0132980086952955	None
9291	srb-16	F58A6.6	4.38703551843634	0.8975	0.204580062374306	0.0132980086952955	srb-16 is predicted to have G-protein coupled receptor activity, based on protein domain information; srb-16 is expressed in the pharynx, nervous system, reproductive system, and the intestine.
8792	F54E4.3	F54E4.3	4.38608542468377	1	0.227993735455368	0.0132980086952955	None
3673	C48E7.1	C48E7.1	4.38387226362229	1.1575	0.264035977873951	0.0132980086952955	C48E7.1 is involved in body morphogenesis, gamete generation and nematode larval development.
11388	R04B3.3	R04B3.3	4.38190171468723	0.905	0.206531332495803	0.0132980086952955	None
2783	C33D9.10	C33D9.10	4.37840796279762	1.37	0.312899120328802	0.0132980086952955	None
10459	K08C7.6	K08C7.6	4.37569960861263	0.8475	0.193683313710996	0.0132980086952955	K08C7.6 is localized to the sarcoplasmic reticulum.
11271	R01E6.2	R01E6.2	4.36879380694601	1.8675	0.427463524836268	0.0132980086952955	None
1690	C14C6.2	C14C6.2	4.36592284038338	0.7775	0.17808377024174	0.0132980086952955	None
16857	gst-27	Y53F4B.30	4.36550643953917	0.685	0.156911920641288	0.0132980086952955	gst-27 is an ortholog of human HPGDS (hematopoietic prostaglandin D synthase).
4031	C54D2.1	C54D2.1	4.3644943068151	1.8425	0.422156582292469	0.0132980086952955	None
9550	col-177	F59F3.2	4.36436625557987	1.45055555555556	0.332363388086646	0.0132980086952955	col-177 is an ortholog of members of the human COL (Collagens) family including COL4A2; col-177 is involved in locomotion.
3194	mls-2	C39E6.4	4.36355272072265	0.9575	0.219431289429094	0.0132980086952955	mls-2 encodes a homeodomain protein of the HMX family; during postembryonic development, MLS-2 is required for cell proliferation, cleavage orientation, and fate specification in the mesodermal M lineage; in regulating M lineage proliferation and fate specification, MLS-2 appears to act upstream of CYE-1/cyclin E and HLH-1/CeMyoD, respectively, the latter of which is not expressed in the M lineag…
7141	fkb-1	F36H1.1	4.36226194436866	0.4675	0.107169171856703	0.0132980086952955	fkb-1 encodes a homolog of mouse FK506-binding protein 2.
10032	zip-2	K02F3.4	4.36183353659691	0.55	0.126093762035015	0.0132980086952955	zip-2 encodes a bZIP transcription factor; ZIP-2 activity is required for regulating one branch of the immune response pathway that responds to infection by virulent strains of the bacterial pathogen Pseudomonas aeruginosa; specifically, ZIP-2 is required for inducing expression of a subset of infection response genes, including irg-1 and irg-2, and for full resistance to P. aeruginosa infection.
2808	lact-5	C33F10.7	4.35505518985688	0.855	0.19632357403675	0.0132980086952955	lact-5 encodes beta-lactamase domain-containing proteins.
8742	fbxa-24	F54D10.2	4.35248680630966	0.6325	0.145319222813745	0.0132980086952955	None
8412	ins-34	F52B11.6	4.35112216677047	0.78	0.179264100180147	0.0132980086952955	ins-34 encodes an insulin-like peptide.
1431	npax-4	C09G9.7	4.35096093066816	0.5575	0.12813261458415	0.0132980086952955	npax-4 is involved in embryo development and lipid storage; npax-4 is predicted to have DNA binding activity, based on protein domain information; npax-4 is expressed in the pseudocoelom and the body wall musculature.
14870	ccb-2	W10C8.1	4.34592752565954	0.85125	0.195873031700135	0.0132980086952955	ccb-2 encodes a beta subunit of a voltage-gated calcium channel; a ccb-2::gfp promoter fusion is expressed in a few neurons in the head and in the ventral cord neurons.
11368	R03H10.2	R03H10.2	4.34566156182297	0.9	0.207103104371169	0.0132980086952955	None
9125	ins-17	F56F3.6	4.34550205333815	0.4925	0.113335581011098	0.0132980086952955	ins-17 encodes an insulin-like peptide.
7860	F44F1.4	F44F1.4	4.34532385534654	1.035	0.238187079825252	0.0132980086952955	None
10201	emb-9	K04H4.1	4.34470407728641	0.83	0.191037176579906	0.0132980086952955	emb-9 encodes the alpha-1 chain of Type IV basement membrane collagen most closely equivalent to human COL4A1 (OMIM:120130) on the basis of biological function; EMB-9 forms heterotrimeric Type IV collagen with LET-2, the alpha-2-like chain, and is required for the assembly and/or secretion of LET-2; EMB-9 is essential for embryonic morphogenesis, particularly epidermal elongation, and for larval …
14699	hgo-1	W06D4.1	4.34351969770486	0.76	0.174973305727516	0.0132980086952955	hgo-1 encodes a putative homogentisate 1,2-dioxygenase, orthologous to human HGD (OMIM:607474, mutated in alkaptonuria), that is required for normal resistance to hypertonic stress; HGO-1 is expressed in larval and adult hypodermis and intestine, and in larval pharynx; HGO-1 is required for the tyrosinemic phenotype of K10C2.4(RNAi) animals.
8767	F54D5.3	F54D5.3	4.34326485105502	0.5625	0.129510867812577	0.0245082754111248	None
17230	Y57G11C.32	Y57G11C.32	4.34269930616915	1.2725	0.2930205179512	0.0245082754111248	None
11003	M02F4.3	M02F4.3	4.33623816404568	0.665	0.153358735116053	0.0245082754111248	M02F4.3 encodes a predicted transmembrane protein orthologous to human ACDP1-ACDP4 and S. cerevisiae MAM3, and paralogous to C01H6.6, C33D12.2, C52D10.12, R04E5.2, and R13G10.4; by orthology with MAM3, M02F4.3 may participate in metal homoeostasis; M02F4.3, MAM3, and ACDP1-ACDP4 belong to a family of proteins (sharing an ACD domain) from bacteria, yeast, plants, and metazoa; murine Acdp1 is a pla…
3327	ifp-1	C43C3.1	4.33570102709329	1.24	0.285997579688125	0.0245082754111248	ifp-1 encodes a nonessential intermediate filament protein; IFP-1 is predicted to function as a structural component of the cytoskeleton; IFP-1 has no obvious function in RNAi assays.
16606	glrx-5	Y49E10.2	4.33338344061878	0.5325	0.122883194459238	0.0245082754111248	glrx-5 encodes a glutaredoxin, oxidoreductases of the thioredoxin family; by homology, GLRX-5 is predicted to function in regulation of the thiol redox state of proteins.
5027	ifb-2	F10C1.7	4.33124983498998	0.7075	0.163347769570913	0.0245082754111248	ifb-2 encodes an intermediate filament protein; IFB-2 is expressed exclusively in the intestine and functions as a structural component of the intestinal terminal web; within the terminal web, IFB-2 localizes to a discrete substructure known as the endotube.
3665	C48D1.1	C48D1.1	4.32878318213777	1.285	0.296850164568742	0.0245082754111248	C48D1.1 is an ortholog of human FBXL16 (F-box and leucine-rich repeat protein 16).
6783	F32D8.11	F32D8.11	4.32757837680721	0.415	0.0958965878524833	0.0245082754111248	None
16380	Y47D3B.1	Y47D3B.1	4.32614291105532	1.2625	0.291830396257535	0.0245082754111248	Y47D3B.1 is involved in locomotion, the molting cycle, nematode larval development and oviposition.
2870	C34C12.7	C34C12.7	4.32609782620749	0.49	0.113266047067078	0.0245082754111248	Uncharacterized protein C34C12.7
13791	T23C6.4	T23C6.4	4.32365204389748	0.7	0.161900169785401	0.0245082754111248	None
67	che-12	B0024.8	4.32255268714195	1.915	0.443025253502738	0.0245082754111248	che-12 encodes a conserved protein orthologous to the mammalian protein Crescerin1 encoded by the gene FAM179B (KIAA0423); CHE-12 activity is required continuously in sensory neurons for formation of distal ciliary segments and thus, for normal sensory cilium morphology and function and chemotaxis to a subset of attractants, including sodium chloride; CHE-12 contains four TOG domains whose tubuli…
8616	F53F10.7	F53F10.7	4.31899363032808	0.89125	0.206355942213395	0.0245082754111248	probable non-coding RNA
10600	sul-1	K09C4.8	4.31787216949363	0.81	0.187592399266186	0.0245082754111248	sul-1 encodes the sole C. elegans 6-O-endosulfatase; by homology, SUL-1 is predicted to function in enzymatic removal of the 6-O-sulfate group of heparan sulfate; accordingly, loss-of-function mutations in sul-1 result in increased heparan sulfate 6-O-sulfation.
4801	gpc-2	F08B6.2	4.31726554457008	0.6675	0.154611754386878	0.0245082754111248	gpc-2 encodes one of two C. elegans heterotrimeric G protein gamma subunits; gpc-2 is required, along with its partner GPB-1, a G protein beta subunit, for proper mitotic spindle positioning and orientation during early embryonic cell divisions; to date, GPC-2 expression has been reported in electrically excitable cells (all neurons and muscles).
6694	sdz-16	F31E9.4	4.30860795289356	1.7175	0.398620626145985	0.0245082754111248	This gene encodes a protein containing an F-box, a motif predicted to mediate protein-protein interactions either with homologs of yeast Skp-1p or with other proteins.
13712	T22D1.11	T22D1.11	4.30846919341697	0.8475	0.196705595874961	0.0245082754111248	T22D1.11 is an ortholog of human CEL (carboxyl ester lipase) and members of the CES (Carboxylesterases) family including CES4A.
17802	Y73B6BL.14	Y73B6BL.14	4.30840474508329	0.73	0.169436263116428	0.0245082754111248	Y73B6BL.14 is an ortholog of human LIG1 (ligase I, DNA, ATP-dependent); Y73B6BL.14 is predicted to have DNA binding activity and DNA ligase (ATP) activity, based on protein domain information.
14743	cpr-5	W07B8.5	4.30642263604084	0.705	0.163708966718638	0.0245082754111248	cpr-5 encodes a cysteine protease.
1017	C05E7.1	C05E7.1	4.30574828828869	2.7075	0.628810561770227	0.0245082754111248	None
6921	F35A5.5	F35A5.5	4.30016161461599	1.8575	0.431960509039118	0.0245082754111248	F35A5.5 is involved in locomotion.
147	nlp-29	B0213.4	4.29860143273883	1.9375	0.450727993817638	0.0245082754111248	nlp-29 encodes an antimicrobial, neuropeptide-like protein; nlp-29 appears to play a role in innate immunity, as its expression in the epidermis is strongly induced following fungal infection; nlp-29 expression is also induced following physical injury and osmotic stress; nlp-29 expression following fungal infection or physical wounding is regulated by a TIR-1, (Toll-interleukin 1 receptor (TIR) …
5376	unc-97	F14D12.2	4.2978573244499	0.6475	0.150656466960051	0.0245082754111248	The unc-97 gene encodes a LIM domain-containing protein of the PINCH family that is highly similar to human LIMS1 (OMIM:602567) and LIMS2; UNC-97 functions as an adaptor protein important for assembly of muscle adherens junctions and the mechanosensory functions of the touch neurons; UNC-97 interacts with PAT-4/integrin-linked kinase and with UNC-98; UNC-97 colocalizes with PAT-3/beta integrin at…
9065	F56C9.8	F56C9.8	4.29534453490354	1.18	0.274716030439803	0.0245082754111248	None
18340	ZC376.8	ZC376.8	4.29130865668655	0.39375	0.0917552270183302	0.0245082754111248	ZC376.8 is involved in apoptotic process and oogenesis.
11130	sdz-25	M116.4	4.28780531301281	1.1325	0.264121133616548	0.0245082754111248	None
11604	R07E3.2	R07E3.2	4.28683871162362	1.105	0.257765704364811	0.0245082754111248	None
1338	C08H9.15	C08H9.15	4.28589103343566	0.6925	0.161576669728086	0.0245082754111248	None
211	B0252.1	B0252.1	4.28476713228677	0.655	0.152867117343301	0.0245082754111248	B0252.1 is an ortholog of human ALK (anaplastic lymphoma receptor tyrosine kinase); B0252.1 is predicted to have protein kinase activity, based on protein domain information.
18656	ZK1320.2	ZK1320.2	4.28200141622304	0.6425	0.150046657519959	0.0245082754111248	ZK1320.2 is involved in innate immune response.
1564	fipr-7	C12D8.16	4.28083902308529	1.3325	0.311270756226577	0.0245082754111248	None
2684	sdz-4	C32B5.16	4.28072935268545	1.875	0.43800947117195	0.0245082754111248	sdz-4 is involved in striated muscle myosin thick filament assembly.
962	C05C9.1	C05C9.1	4.27725862601685	1.015	0.237301526221997	0.0245082754111248	C05C9.1 is an ortholog of members of the human BPIF (BPI fold containing) family including PLTP; C05C9.1 is predicted to have lipid binding activity, based on protein domain information.
2760	C33B4.2	C33B4.2	4.27627250471764	1.1975	0.280033603723547	0.0245082754111248	None
5849	F20D6.5	F20D6.5	4.27626340980075	0.7775	0.181817611660229	0.0245082754111248	None
3823	C50E3.6	C50E3.6	4.2760023238302	0.8425	0.19702982744063	0.0245082754111248	None
14068	ndx-1	T26E3.2	4.27490187454907	0.9825	0.229829836761724	0.0245082754111248	The ndx-1 gene encodes a NUDIX hydrolase.
5186	F11E6.4	F11E6.4	4.27136479653483	0.7475	0.17500261289001	0.0245082754111248	None
2987	clec-5	C35D10.14	4.27023360030429	2.1075	0.493532719111624	0.0245082754111248	clec-5 is an ortholog of human CLEC3B (C-type lectin domain family 3, member B) and CLEC3A (C-type lectin domain family 3, member A); clec-5 is expressed in the anal depressor muscle, head, intestine, and the rectal gland cell.
11356	R03E9.2	R03E9.2	4.27015968008901	0.76	0.177979292798755	0.0245082754111248	R03E9.2 is predicted to have mannosyl-oligosaccharide glucosidase activity, based on protein domain information.
76	B0034.7	B0034.7	4.26786324341754	1.6275	0.381338367041199	0.0245082754111248	B0034.7 is a predicted gene that can encode a small, novel protein that has similarity to a predicted C. remanei protein and to a region of a hypothetical protein from the anammox bacterium Candidatus Kuenenia stuttgartiensis.
2144	C24B5.4	C24B5.4	4.26776563679346	0.425	0.0995837251080448	0.0245082754111248	C24B5.4 is an ortholog of human C11orf54 (chromosome 11 open reading frame 54); C24B5.4 is expressed in the body wall musculature.
5800	arl-3	F19H8.3	4.25878659631252	1.2575	0.295271897654794	0.0245082754111248	arl-3 encodes a member of the ARL (ADP-ribosylation factor(ARF)-like) family of proteins which are very similar to ARF proteins but lack the ability to stimulate ADP ribosylation by cholera toxin; an arl-3 deletion allele, tm1703, results in essentially wild-type animals that display slight defects in male mating behavior; ARL-3::GFP reporter fusions are expressed in ciliated neurons, where they …
6330	F26E4.3	F26E4.3	4.25434830758028	1.1875	0.279126182001635	0.0245082754111248	F26E4.3 is an ortholog of human TINAG (tubulointerstitial nephritis antigen) and TINAGL1 (tubulointerstitial nephritis antigen-like 1); F26E4.3 is predicted to have cysteine-type peptidase activity, based on protein domain information.
14067	T26E3.11	T26E3.11	4.25365746792649	1.8725	0.4402093995859	0.0245082754111248	None
9027	gst-40	F56B3.10	4.2528659817904	1.3175	0.30979109279276	0.0245082754111248	gst-40 is an ortholog of human HPGDS (hematopoietic prostaglandin D synthase); gst-40 is involved in striated muscle myosin thick filament assembly.
15031	Y105E8B.7	Y105E8B.7	4.25042903580023	0.6425	0.151161210924449	0.0245082754111248	Y105E8B.7 is an ortholog of human YEATS4 (YEATS domain containing 4).
1799	lin-18	C16B8.1	4.2478656202781	0.39	0.0918108139151699	0.0245082754111248	lin-18 encodes a predicted receptor tyrosine kinase that is a member of the Ryk/Derailed family of tyrosine kinase-related receptors (OMIM:600524, mutations in humans are associated with cleft palate); in C. elegans, LIN-18 is required for establishing the polarity of the secondary vulval cell lineage produced by the P7.p vulval precursor cell; LIN-18 may be a receptor for Wnt-like signaling mole…
16119	Y43C5A.3	Y43C5A.3	4.24742000023512	0.82	0.193058374249452	0.0245082754111248	Y43C5A.3 is expressed in the hypodermis and the ventral cord blast cell.
15391	Y18H1A.9	Y18H1A.9	4.24377761001634	1.8925	0.44594702501216	0.0245082754111248	Y18H1A.9 is an ortholog of human CPB2 (carboxypeptidase B2 (plasma)), CPO (carboxypeptidase O), CPA3 (carboxypeptidase A3 (mast cell)), CPA5 (carboxypeptidase A5), CPA2 (carboxypeptidase A2 (pancreatic)), CPA6 (carboxypeptidase A6), CPA4 (carboxypeptidase A4), CPA1 (carboxypeptidase A1 (pancreatic)) and CPB1 (carboxypeptidase B1 (tissue)); Y18H1A.9 is involved in regulation of cell proliferation …
2640	C31C9.2	C31C9.2	4.24200200196154	0.865	0.203913152233312	0.0245082754111248	C31C9.2 is orthologous to the human gene PHOSPHOGLYCERATE DEHYDROGENASE (PHGDH; OMIM:606879), which when mutated leads to phosphoglycerate dehydrogenase deficiency.
949	gtl-1	C05C12.3	4.24072519953833	0.5325	0.125568145763836	0.0245082754111248	gtl-1 encodes a TRPM subfamily member of the TRP channel family that affects the periodicity of the defecation cycle in combination with gon-2; expression includes the intestine.
4161	C56E10.3	C56E10.3	4.23976328339015	0.735	0.173358735116053	0.0245082754111248	C56E10.3 is involved in lipid storage.
594	C01F1.3	C01F1.3	4.23959637614218	1.19	0.280687097171934	0.0245082754111248	C01F1.3 is an ortholog of human TGDS (TDP-glucose 4,6-dehydratase); C01F1.3 is involved in locomotion, nematode larval development and oviposition; C01F1.3 is predicted to have catalytic activity and coenzyme binding activity, based on protein domain information.
10273	K06A9.3	K06A9.3	4.23873665449383	0.655	0.154527174814123	0.0245082754111248	None
17631	hex-5	Y70D2A.2	4.23702432470251	1.2175	0.287347890098668	0.0245082754111248	hex-5 encodes a beta-N-acetylhexosaminidase.
5031	F10C2.3	F10C2.3	4.23664530425561	0.875	0.206531332495803	0.0245082754111248	F10C2.3 is predicted to have catalytic activity, based on protein domain information.
10454	K08C7.1	K08C7.1	4.23626462780966	0.5225	0.123339792460075	0.0245082754111248	K08C7.1 is an ortholog of members of the human SLC (Solute carriers) family including SLC37A1.
8361	F49E7.2	F49E7.2	4.23331404675825	0.825	0.194882777627084	0.0245082754111248	None
14879	W10D9.2	W10D9.2	4.22622361442911	0.75875	0.179533803514203	0.0245082754111248	This gene encodes a protein containing an F-box, a motif predicted to mediate protein-protein interactions either with homologs of yeast Skp-1p or with other proteins.
6824	F32H5.1	F32H5.1	4.22553523955175	0.6525	0.154418307506345	0.0245082754111248	F32H5.1 is an ortholog of human CTSB (cathepsin B); F32H5.1 is predicted to have cysteine-type peptidase activity, based on protein domain information.
1105	ztf-30	C06E1.8	4.22373787424166	1.2921875	0.305934586490409	0.0245082754111248	ztf-30 is predicted to have metal ion binding activity, based on protein domain information.
9737	let-805	H19M22.2	4.22365095906535	0.7325	0.17342815661124	0.0245082754111248	let-805 encodes myotactin, a novel single-transmembrane protein containing extracellular fibronectin repeats; genetic analyses indicate that LET-805 is essential for proper association between hypodermal fibrous organelles and the contractile apparatus of muscle cells; LET-805 is expressed in hypodermal cells and in the pharynx and localizes to basolateral membranes.
15160	Y113G7B.11	Y113G7B.11	4.22336302699342	0.44	0.104182377216394	0.0245082754111248	None
4544	maoc-1	E04F6.3	4.22253886923122	0.835	0.197748327690829	0.0245082754111248	maoc-1 encodes an ortholog of human HSD17B4 (OMIM:601860, mutated in D-bifunctional protein deficiency); MAOC-1 contains a MaoC-like domain found in diverse enzymes (HSD17B4, peroxisomal hydratase-dehydrogenase-epimerase, and the fatty acid synthase beta subunit) and by homology, is predicted to function in peroxisomal fatty acid beta-oxidation; loss of maoc-1 activity via RNAi results in lifespa…
10991	M02D8.1	M02D8.1	4.21756166564557	0.55	0.130407103346007	0.0245082754111248	zig-12 is localized to the endoplasmic reticulum, the sarcomere and the striated muscle dense body.
5296	F13D12.9	F13D12.9	4.21668791772803	0.4175	0.099011358712302	0.0245082754111248	F13D12.9 is involved in lipid storage.
4589	F01D5.10	F01D5.10	4.21578091432479	1.18	0.279900693129115	0.0245082754111248	F01D5.10 is predicted to have sulfotransferase activity, based on protein domain information.
2134	twk-18	C24A3.6	4.21491113778805	0.525	0.124557786116344	0.0245082754111248	twk-18 encodes one of 44 C. elegans TWK (two-P domain K+) potassium channel subunits that contain two pore-forming domains and four transmembrane domains; TWK-18 was originally defined by gain-of-function mutations that result in embryonic lethality at the two-fold stage, locomotion defects, longer than normal body length, abnormal egg-laying, and temperature-sensitive paralysis; as loss of TWK-1…
14479	sknr-1	W02H5.7	4.21485876500343	0.6125	0.145319222813745	0.0245082754111248	sknr-1 is an ortholog of members of the human Basic leucine zipper proteins family including NFE2L1; sknr-1 is involved in embryo development; sknr-1 is predicted to have DNA binding activity, based on protein domain information; sknr-1 is expressed in the pharynx, nervous system, reproductive system, pharyngeal-intestinal valve, intestine, rectal epithelium, and the body wall musculature.
9719	unc-23	H14N18.1	4.21058992372984	0.8925	0.211965547860667	0.0245082754111248	unc-23 encodes a protein with similarity to the BAG2 (BCL2 AnthaGene) protein that functions to negatively regulate proteosomal degradation by the E3 ubiquitin ligase and Hsp70 co-chaperone CHIP (Carboxyl-terminus of Hsp70 Interacting Protein); in C. elegans, unc-23 is required for proper attachment of the anterior body wall musculature to the overlying hypodermis.
9739	H19M22.4	H19M22.4	4.21041405812472	0.605	0.14369133098265	0.0245082754111248	probable non-coding RNA
17156	Y57A10A.23	Y57A10A.23	4.20943217356916	1.2675	0.301109495945457	0.0245082754111248	Y57A10A.23 is an ortholog of human AGR3 (anterior gradient 3, protein disulphide isomerase family member), AGR2 (anterior gradient 2, protein disulphide isomerase family member) and TXNDC12 (thioredoxin domain containing 12 (endoplasmic reticulum)).
3929	fbxb-95	C52E2.1	4.20867006408607	1.8475	0.438974776323122	0.0245082754111248	This gene encodes a protein containing an F-box, a motif predicted to mediate protein-protein interactions either with homologs of yeast Skp-1p or with other proteins; this gene's encoded protein also contains an FTH/DUF38 motif, which may also mediate protein-protein interaction.
902	dhs-27	C04F6.5	4.20861869400229	0.74	0.175829661417076	0.0245082754111248	dhs-27 encodes a short-chain dehydrogenase predicted to be mitochondrial.
8474	ifa-3	F52E10.5	4.20768162098355	0.8025	0.190722605055944	0.0245082754111248	ifa-3 encodes an essential intermediate filament protein that is coexpressed with the essential IF protein IFB-1; IFA-3 is required for survival past early larval stages, correct positioning of excretory canals and body muscles, attachment of cuticle to hypodermis, and locomotion; IFA-3 forms heteropolymeric intermediate filaments in vitro with an equimolar mixture of IFB-1; IFA-3 is expressed in…
17076	cutl-25	Y55D5A.6	4.20277191730556	1.0925	0.259947487395512	0.0245082754111248	None
16743	Y51F10.7	Y51F10.7	4.19900276994685	0.435	0.103596025969163	0.0245082754111248	None
8440	F52C9.5	F52C9.5	4.19821820400693	0.995	0.237005308359231	0.0245082754111248	Uncharacterized protein F52C9.5
17924	php-3	Y75B8A.1	4.19663484214143	0.8	0.190628927722428	0.0245082754111248	php-3 is an ortholog of members of the human HOXL subclass homeoboxes family including HOXD9; php-3 is predicted to have DNA binding activity, based on protein domain information; php-3 is expressed in the coelomocyte, intestine, body wall musculature, ventral nerve cord, dorsal nerve cord, head neurons, and the tail neurons.
3847	his-41	C50F4.5	4.19521878453621	0.4975	0.118587379002452	0.0245082754111248	his-41 encodes an H2B histone.
3876	fipr-11	C50H2.10	4.19351730617325	0.905	0.215809291800884	0.0245082754111248	None
2405	C27C7.7	C27C7.7	4.18291589590519	1.54	0.368164227616329	0.0245082754111248	None
13305	chd-3	T14G8.1	4.18202304006998	0.685	0.163796323797522	0.0245082754111248	chd-3 encodes a PHD-finger SNF2 family member containing a chromo domain and a C-terminal helicase domain that affects Notch-dependent vulval development; expressed in virtually all embryonic cells and in many larval nuclei.
9678	H11E01.3	H11E01.3	4.18110531131356	0.5875	0.140513083564362	0.0245082754111248	H11E01.3 is involved in embryo development.
5071	F10E7.9	F10E7.9	4.17917406875094	0.91	0.217746374051363	0.0245082754111248	F10E7.9 is an ortholog of human SLC12A8 (solute carrier family 12, member 8); F10E7.9 is involved in embryo development and reproduction; F10E7.9 is expressed in the retrovesicular ganglion neurons, nerve ring, and the tail neurons.
16175	Y43F8C.13	Y43F8C.13	4.17738238768207	0.4375	0.104730656520711	0.0245082754111248	None
10950	sepa-1	M01E5.6	4.17526997986354	1.5675	0.375424824636425	0.0245082754111248	sepa-1 encodes a self associating adaptor protein of 702 amino acids rich in helical structures at its N-terminus and a protein interaction KIX domain at the C-terminus; SEPA-1 is required for degradation of germline P granule components PGL-1 and PGL-3 in somatic cells by the autophagic machinery; sepa-1 forms protein aggregates and is preferentially removed by autophagy during embryogenesis; SE…
1839	C16C8.2	C16C8.2	4.17293821357314	1.5725	0.376832802097379	0.0245082754111248	skpo-2 is predicted to have heme binding activity and peroxidase activity, based on protein domain information.
17182	daf-22	Y57A10C.6	4.17147194257898	0.8475	0.203165695866107	0.0245082754111248	daf-22 encodes the C. elegans ortholog of human sterol carrier protein SCP2, which catalyzes the final step in peroxisomal fatty acid beta-oxidation; in C. elegans, DAF-22 activity is required for dauer pheromone biosynthesis; daf-22 mutant animals cannot produce dauer pheromone, but can synthesize weakly active longer-chain fatty acid derivatives; in synthesizing dauer pheromone, DAF-22 acts dow…
10925	btb-11	M01D1.3	4.17084770510011	1.8125	0.434563937154473	0.0245082754111248	None
10794	K11D12.6	K11D12.6	4.17084534740399	0.5875	0.140858735116053	0.0245082754111248	K11D12.6 encodes a putative serine protease inhibitor, with no obvious non-nematode orthologs but multiple C. elegans paralogs; K11D12.6 antagonizes CEP-1- and HUS-1-dependent germline apoptosis, as do BMK-1, RAD-50, and RAD-51.
4790	prx-12	F08B12.2	4.16550037138993	0.745	0.178850062075834	0.0245082754111248	prx-12 is an ortholog of human PEX12 (peroxisomal biogenesis factor 12); prx-12 is involved in embryo development, nematode larval development and peroxisome organization; prx-12 is predicted to have protein C-terminus binding activity and zinc ion binding activity, based on protein domain information.
4847	kap-1	F08F8.3	4.165155162792	0.7975	0.191469457638504	0.0245082754111248	kap-1 encodes a kinesin-associated protein that, along with KLP-20 and KLP-11, is part of the C. elegans heterotrimeric kinesin-II motor protein; animals homozygous for a kap-1 loss-of-function mutation have normal cilia and thus display normal dye-filling and osmotic avoidance behavior; however, animals doubly mutant for kap-1 and osm-3, which encodes a homomeric kinesin-II motor protein, do sho…
17446	lpr-1	Y65B4BR.2	4.16320059359275	1.305	0.313460754691576	0.0245082754111248	lpr-1 encodes one of seven C. elegans proteins related to the lipocalin family of structurally related, low molecular weight, secreted proteins that bind and transport lipophilic molecules and participate in intercellular signaling; in C. elegans, LPR-1 activity is required for connectivity between the lumens of two unicellular tubes in the nematode excretory system formed by the excretory duct c…
14600	W04E12.9	W04E12.9	4.16267522438366	1.53	0.367552095113675	0.0245082754111248	None
7067	F36A2.3	F36A2.3	4.1622564725588	0.9425	0.226439674300172	0.0245082754111248	F36A2.3 encodes a protein with similarity to malate dehydrogenase; by homology, the product of F36A2.3 is predicted to function in the citric acid cycle to catalyze the formation of oxaloacetate from malate.
6599	F29G6.2	F29G6.2	4.16153181578426	0.9975	0.239695392022857	0.0245082754111248	F29G6.2 is an ortholog of human CCDC149 (coiled-coil domain containing 149); F29G6.2 is expressed in the nervous system.
13421	T19B10.5	T19B10.5	4.16108096414717	0.8975	0.215689146097628	0.0245082754111248	T19B10.5 encodes a protein with partial similarity to human PERIAXIN (PRX; OMIM:605725), which when mutated leads to Dejerine-Sottas neuropathy.
8651	pqn-42	F53G2.4	4.16077607879233	0.6425	0.154418307506345	0.0245082754111248	The protein product of this gene is predicted to contain a glutamine/asparagine (Q/N)-rich ('prion') domain, by the algorithm of Michelitsch and Weissman (as of the WS77 release of WormBase, i.e., in wormpep77).
3467	gln-1	C45B2.5	4.15938230910777	0.405	0.0973702270919348	0.0245082754111248	gln-1 is an ortholog of human GLUL (glutamate-ammonia ligase); gln-1 is predicted to have glutamate-ammonia ligase activity, based on protein domain information.
9677	H11E01.2	H11E01.2	4.15739261648479	0.94	0.226103254302405	0.0245082754111248	H11E01.2 is an ortholog of members of the human SLC (Solute carriers) family including SLC37A1.
14101	nhr-79	T26H2.9	4.15730270266669	0.7525	0.18100678584634	0.0245082754111248	nhr-79 is involved in lipid storage; nhr-79 is predicted to have sequence-specific DNA binding activity, transcription factor activity, sequence-specific DNA binding, and zinc ion binding activity, based on protein domain information; nhr-79 is expressed in the anterior hypodermis, certain amphid neurons, intestine, Eplpp, Ealaa, Earaa, Eala, Eara, Eprpp, Epra, Ear, Eplp, Eprp, Ealp, Epr, Earp, a…
9132	pes-2.1	F56G4.2	4.15445991702649	2.0075	0.483215638156125	0.0245082754111248	pes-2 encodes a protein containing a predicted signal sequence and an F-box, a motif believed to mediate protein-protein interactions either with homologs of yeast Skp1p or with other proteins; pes-2 was identified in two different molecular screens, a promoter-trapping screen and a screen for genes that are preferentially transcribed in pre-gastrulation embryos; by homology, pes-2 is predicted t…
1329	C08G5.7	C08G5.7	4.15423953822696	0.81	0.194981534537537	0.0245082754111248	None
13660	cutl-22	T21H3.4	4.15396699257932	1.31002777777778	0.315367883307215	0.0245082754111248	None
9519	F59D6.7	F59D6.7	4.15373272245447	0.7825	0.188384773957631	0.0245082754111248	chpf-2 is an ortholog of human CHP2 (calcineurin-like EF-hand protein 2) and CHP1 (calcineurin-like EF-hand protein 1); chpf-2 is predicted to have calcium ion binding activity, based on protein domain information.
2143	ptr-1	C24B5.3	4.15349745619478	0.95	0.228722904015052	0.0245082754111248	ptr-1 encodes an ortholog of Drosophila and human PTCHD3, which defines one of seven paralogous families of sterol sensing domain (SSD) proteins; individually, PTR-1 is weakly required for normal molting from L4 to adult stages; however, PTR-1, in conjunction with either PTR-16 alone or with PTR-6 and PTR-10, is strongly required for both molting and viability, with double ptr-1/-16 or triple ptr…
3993	C53D6.8	C53D6.8	4.15096093951465	1.28625	0.309868008574996	0.0245082754111248	None
10346	pax-1	K07C11.1	4.15082419564264	0.66	0.1590045660553	0.0245082754111248	pax-1 is an ortholog of human PAX1 (paired box 1) and PAX9 (paired box 9); pax-1 is predicted to have DNA binding activity, based on protein domain information; pax-1 is expressed in the epithelial cell, pharyngeal cell, and the pharyneal marginal cell.
4703	his-51	F07B7.10	4.14904374876237	0.4575	0.110266371651653	0.0245082754111248	his-51 encodes an H2A histone.
4528	tctn-1	E04A4.6	4.1481624528401	0.625	0.150669123281824	0.0245082754111248	tctn-1 is an ortholog of human TCTN2 (tectonic family member 2) and TCTN3 (tectonic family member 3).
10011	K02E2.8	K02E2.8	4.14737105786954	2.225	0.536484430487143	0.0245082754111248	None
15935	Y39G10AR.11	Y39G10AR.11	4.14604474435031	0.6025	0.145319222813745	0.0245082754111248	Y39G10AR.11 is involved in embryo development and gene expression.
11514	R06B10.2	R06B10.2	4.14428647543009	0.9725	0.234660418811679	0.0245082754111248	R06B10.2 is predicted to have protein tyrosine phosphatase activity, based on protein domain information.
1747	C15C8.5	C15C8.5	4.1426274543598	0.73	0.176216666365142	0.0245082754111248	None
17270	Y58A7A.4	Y58A7A.4	4.14212015648028	1.915	0.46232362356848	0.0245082754111248	Y58A7A.4 is expressed in the intestine and the head neurons.
10080	K03B8.6	K03B8.6	4.14057776185344	0.645	0.155775362062342	0.0245082754111248	None
13401	asp-2	T18H9.2	4.13824902441399	0.4975	0.120219928057725	0.0245082754111248	asp-2 encodes aspartic protease.
10263	K06A4.7	K06A4.7	4.13768774199118	0.8475	0.204824542799394	0.0245082754111248	None
7179	F36H9.7	F36H9.7	4.13640311048737	1.1275	0.272579816300146	0.0245082754111248	None
9030	F56B3.2	F56B3.2	4.13497341988698	0.5125	0.12394275560156	0.0245082754111248	F56B3.2 is involved in lipid storage, locomotion and nematode larval development.
15348	Y17G9B.2	Y17G9B.2	4.13418395885157	1.305	0.315660844555769	0.0245082754111248	None
18480	ZK1010.4	ZK1010.4	4.13313310246784	1.7525	0.424012475899604	0.0245082754111248	ZK1010.4 is an ortholog of human FAM46C (family with sequence similarity 46, member C), FAM46D (family with sequence similarity 46, member D), FAM46B (family with sequence similarity 46, member B) and FAM46A (family with sequence similarity 46, member A).
11721	cnc-2	R09B5.3	4.13242160827852	2.4725	0.598317459923938	0.0245082754111248	cnc-2 encodes one of eleven C. elegans caenacin peptides; cnc-2 functions as a secreted antimicrobial peptide in the innate immune response: cnc-2 expression is strongly induced in the epidermis upon infection by the fungal pathogen and overexpression of cnc-2 promotes survival after D. coniospora infection; cnc-2 expression is also induced upon infection by the Gram negative bacterium Serratia m…
977	C05D11.5	C05D11.5	4.13224166557711	0.9225	0.22324444566849	0.0245082754111248	C05D11.5 is an ortholog of human HYI (hydroxypyruvate isomerase (putative)); C05D11.5 is expressed in the hypodermis, reproductive system, intestine, and the body wall musculature.
2685	fbxc-17	C32B5.17	4.1306416180646	0.81	0.196095443491784	0.0245082754111248	non-coding Transcript Isoform
8332	F49E10.2	F49E10.2	4.13022874739834	1.385	0.335332516600303	0.0245082754111248	F49E10.2 is an ortholog of human RPE65 (retinal pigment epithelium-specific protein), BCO1 (beta-carotene oxygenase 1) and BCO2 (beta-carotene oxygenase 2).
2437	glc-4	C27H5.8	4.12978173244083	1.18	0.285729386308894	0.0245082754111248	glc-4 encodes a predicted glutamate-gated chloride channel that affects ivermectin sensitivity and reversal behavior and genetically interacts with avr-14; expressed in neurons.
9909	hrg-2	K01D12.14	4.12314341033821	0.6625	0.160678379107279	0.0245082754111248	hrg-2 exhibits heme binding activity; hrg-2 is expressed in the hypodermis.
17709	pqn-88	Y71G12B.21	4.12075248087315	0.4425	0.10738330002928	0.0245082754111248	The protein product of this gene is predicted to contain a glutamine/asparagine (Q/N)-rich ('prion') domain, by the algorithm of Michelitsch and Weissman (as of the WS77 release of WormBase, i.e., in wormpep77).
16669	Y50D4B.6	Y50D4B.6	4.12057007080716	0.655	0.158958587948899	0.0245082754111248	Y50D4B.6 encodes a protein kinase that is a member of the KIN-16 family of C. elegans receptor protein tyrosine kinases.
1330	C08G9.1	C08G9.1	4.1194018852802	1.215	0.294945730918254	0.0245082754111248	C08G9.1 is predicted to have transmembrane receptor protein serine/threonine kinase activity, based on protein domain information.
598	rga-6	C01F4.2	4.11714580644506	0.59	0.14330315896911	0.0245082754111248	rga-6 is an ortholog of human ARHGAP6 (Rho GTPase activating protein 6) and ARHGAP36 (Rho GTPase activating protein 36); rga-6 is involved in defense response to fungus; rga-6 is expressed in the nervous system and the intestine.
6436	phg-1	F27E5.4	4.11705915637527	1.23	0.298756941127587	0.0245082754111248	phg-1 is involved in embryo development and mitotic nuclear division; phg-1 is expressed in the muscle cell and the pharynx.
3982	marc-4	C53D5.2	4.11450355681432	0.8425	0.20476346377309	0.0245082754111248	marc-4 is an ortholog of members of the human RNF (Ring finger proteins) family including MARCH11; marc-4 is predicted to have zinc ion binding activity, based on protein domain information.
17895	pqn-91	Y73F8A.9	4.11381325536337	0.9175	0.223029083491773	0.0245082754111248	The protein product of this gene is predicted to contain a glutamine/asparagine (Q/N)-rich ('prion') domain, by the algorithm of Michelitsch and Weissman (as of the WS77 release of WormBase, i.e., in wormpep77).
5484	F15B10.3	F15B10.3	4.11371792907833	1.2025	0.292314645955664	0.0245082754111248	None
18045	linc-40	Y82E9BL.20	4.11233517761578	0.9275	0.225540954212234	0.0245082754111248	C. elegans lincRNA gene
3482	ilys-2	C45G7.2	4.10731280336628	0.6425	0.156428309885095	0.0245082754111248	ilys-2 is involved in defense response to Gram-positive bacterium; ilys-2 is predicted to have lysozyme activity, based on protein domain information.
2546	C29G2.3	C29G2.3	4.10552447214507	2.3175	0.564483299447767	0.0245082754111248	None
13778	T23B3.2	T23B3.2	4.10523931408066	0.4575	0.111442954965088	0.0245082754111248	None
6076	F22H10.4	F22H10.4	4.10385009585119	0.76	0.185191949571532	0.0245082754111248	None
4586	F01D4.8	F01D4.8	4.10216453405659	1.81	0.441230473564186	0.0245082754111248	None
17976	Y76B12C.8	Y76B12C.8	4.09825906621802	0.53	0.129323205643292	0.0245082754111248	None
7826	nstp-8	F44C8.7	4.09797169125885	0.7025	0.171426269610027	0.0245082754111248	nstp-8 is an ortholog of human SLC35A1 (solute carrier family 35 (CMP-sialic acid transporter), member A1); nstp-8 is predicted to have nucleotide-sugar transmembrane transporter activity and sugar:proton symporter activity, based on protein domain information.
17892	ccg-1	Y73F8A.6	4.09628380211007	0.79	0.19285773109594	0.0245082754111248	None
1128	C06G1.2	C06G1.2	4.09613056554773	1.5025	0.366809596509795	0.0245082754111248	None
3436	C44E4.5	C44E4.5	4.09483125581839	0.485	0.118441999120442	0.0245082754111248	C44E4.5 is an ortholog of human NUDCD1 (NudC domain containing 1); C44E4.5 is involved in lipid storage.
11608	R07E3.6	R07E3.6	4.09380935739186	1.675	0.409154372803313	0.0245082754111248	None
16516	gst-20	Y48E1B.10	4.09237381503697	1.1175	0.273068896075395	0.0245082754111248	gst-20 is an ortholog of human HPGDS (hematopoietic prostaglandin D synthase); gst-20 is involved in determination of adult lifespan.
13043	col-168	T10E10.1	4.09189685408387	1.255	0.306703723176077	0.0245082754111248	col-168 is an ortholog of human MARCO (macrophage receptor with collagenous structure); col-168 is involved in body morphogenesis and locomotion; col-168 is a structural constituent of cuticle, based on protein domain information.
7863	lurp-1	F44F4.1	4.08922316489712	0.7675	0.187688460387392	0.0245082754111248	lurp-1 is expressed in the nervous system and the intestine.
17194	lipl-6	Y57E12B.3	4.08887023439815	1.5575	0.380912063899052	0.0245082754111248	lipl-6 is an ortholog of members of the human Lipases family including LIPF.
9681	nhr-68	H12C20.3	4.08781008267802	0.845	0.206712147313464	0.0245082754111248	nhr-68 is involved in lipid storage; nhr-68 is predicted to have sequence-specific DNA binding activity, transcription factor activity, sequence-specific DNA binding, and zinc ion binding activity, based on protein domain information; nhr-68 is expressed in the hypodermis, intestine, head neurons, and the head muscle.
15978	comt-3	Y40B10A.2	4.08528336843004	1.2975	0.317603427470106	0.0245082754111248	comt-3 is an ortholog of human COMTD1 (catechol-O-methyltransferase domain containing 1); comt-3 is predicted to have O-methyltransferase activity, based on protein domain information.
17414	fbxb-101	Y63D3A.3	4.08528272369052	2.57	0.629087427681955	0.0245082754111248	None
12450	T04F8.8	T04F8.8	4.08307151709687	0.6025	0.14756048172979	0.0245082754111248	None
12052	R148.5	R148.5	4.08239680462046	0.64	0.156770649848552	0.0245082754111248	None
1084	C06C3.10	C06C3.10	4.0817066980139	1.9125	0.468553999955606	0.0245082754111248	None
15745	nspe-2	Y38E10A.26	4.08153540454272	1.4775	0.361996124878778	0.0245082754111248	None
14833	W09D12.1	W09D12.1	4.07875209904633	0.6875	0.168556456314358	0.0245082754111248	W09D12.1 is an ortholog of members of the human MMP (Matrix metallopeptidases) family including MMP14; W09D12.1 is predicted to have calcium ion binding activity, metalloendopeptidase activity, and zinc ion binding activity, based on protein domain information.
13396	T18D3.5	T18D3.5	4.07672044063649	0.7725	0.189490550369795	0.0245082754111248	None
8112	dgk-2	F46H6.2	4.07650747008333	0.6975	0.171102348056225	0.0245082754111248	dgk-2 encodes a putative diacylglycerol kinase.
15378	Y18D10A.8	Y18D10A.8	4.07617886888096	0.65	0.159463070907496	0.0245082754111248	Y18D10A.8 is involved in reproduction; Y18D10A.8 is predicted to have RNA binding activity, based on protein domain information.
16319	Y46G5A.28	Y46G5A.28	4.07571207540124	1.795	0.440413838561765	0.0245082754111248	None
3029	cle-1	C36B1.1	4.07491046589799	0.3775	0.0926400722566085	0.0245082754111248	cle-1 encodes the only vertebrate type XV/XVIII collagen homolog in C. elegans and generates multiple developmentally regulated protein isoforms via alternative splicing; cle-1 is required for neuron migrations, including the migration of the HSN, ALM and AVM neurons, axon guidance of the sensory and motor neurons, distal tip cell migration, and for proper morphogenesis of the mail tail; cle-1 is…
1080	C06B8.7	C06B8.7	4.07454864956197	0.5375	0.131916451668281	0.0245082754111248	C06B8.7 is predicted to have scavenger receptor activity, based on protein domain information.
1189	C07B5.4	C07B5.4	4.07407595923922	0.4975	0.122113579858953	0.0245082754111248	C07B5.4 is an ortholog of human RTKN (rhotekin) and RTKN2 (rhotekin 2).
15764	vha-11	Y38F2AL.3	4.07260261699875	0.53	0.130137911758888	0.0245082754111248	vha-11 encodes, by alternative splicing, two isoforms of an ortholog of subunit C of the cytoplasmic (V1) domain of vacuolar proton-translocating ATPase (V-ATPase); VHA-11 is a predicted cytosolic stator (stalk) component; VHA-11 is found in dot-like structures around embryonic nuclei, with diffuse distribution in embryonic cytoplasm; in later embryos (comma stage onward), VHA-11 is found in gut …
4794	cdh-5	F08B4.2	4.07136778265026	0.7125	0.17500261289001	0.0245082754111248	a homolog of cadherin.
12641	nhr-213	T06C12.13	4.06937939630135	1.0675	0.262325012253772	0.0245082754111248	nhr-213 is predicted to have sequence-specific DNA binding activity, transcription factor activity, sequence-specific DNA binding, and zinc ion binding activity, based on protein domain information; nhr-213 is expressed in the pharynx, gonad, intestine, excretory gland cell, excretory cell, ventral nerve cord, vulva, dorsal nerve cord, and the head neurons.
2400	dpf-2	C27C12.7	4.065973729051	0.4725	0.116208325849238	0.0245082754111248	dpf-2 is an ortholog of human FAP (fibroblast activation protein, alpha); dpf-2 is predicted to have serine-type peptidase activity, based on protein domain information; dpf-2 is expressed in the anal depressor muscle, hmc, head, reproductive system, and the seam cell.
7559	F41E6.12	F41E6.12	4.06561808829294	0.8275	0.203536087755712	0.0245082754111248	None
11352	R03E1.2	R03E1.2	4.06514994821146	0.47	0.115616891378579	0.0245082754111248	vha-20 is an ortholog of human ATP6AP2 (ATPase, H+ transporting, lysosomal accessory protein 2); vha-20 is involved in embryo development, locomotion and nematode larval development; vha-20 is predicted to have receptor activity, based on protein domain information.
5326	F13G3.3	F13G3.3	4.06127888785055	0.79	0.19452000756789	0.0245082754111248	UPF0392 protein F13G3.3
15770	Y38F2AR.12	Y38F2AR.12	4.05973229286679	0.695	0.171193554122068	0.0245082754111248	Y38F2AR.12 is an ortholog of human OPLAH (5-oxoprolinase (ATP-hydrolysing)); Y38F2AR.12 is predicted to have hydrolase activity, based on protein domain information.
14199	clec-12	T27F6.2	4.05807623886887	0.6575	0.16202258442125	0.0245082754111248	clec-12 is an ortholog of human CLEC3B (C-type lectin domain family 3, member B) and CLEC3A (C-type lectin domain family 3, member A).
8116	rrc-1	F47A4.3	4.05567244344391	0.585	0.144242418034934	0.0245082754111248	rrc-1 is an ortholog of human ARHGAP33 (Rho GTPase activating protein 33) and ARHGAP32 (Rho GTPase activating protein 32); rrc-1 is expressed in the GLRR, GLRL, coelomocyte, excretory cell, and the uterine seam cell.
3105	C37C3.2	C37C3.2	4.05534579168882	0.4	0.0986352386570277	0.0245082754111248	C37C3.2 encodes the C. elegans ortholog of translation initiation factor 5 (eIF5); by homology to budding yeast, the products of C37C3.2 are predicted to function during translation initiation as GTPase activators to stimulate GTP hydrolysis by eIF2-GTP-Met-tRNAi; C37C3.2 is an essential gene, with loss of C37C3.2 activity via RNAi resulting in maternal sterility, as well as slow growth and embry…
1715	C15A11.2	C15A11.2	4.05373985898854	0.9175	0.226334207895849	0.0245082754111248	C15A11.2 is involved in body morphogenesis, growth, locomotion, nematode larval development and oviposition.
8743	F54D10.3	F54D10.3	4.05233706445805	0.71	0.175207537948217	0.0245082754111248	None
5266	F13B12.3	F13B12.3	4.05198898886148	1.445	0.356614986855138	0.0245082754111248	F13B12.3 is an ortholog of human TRPM1 (transient receptor potential cation channel M1) and TRPM6 (transient receptor potential cation channel M6).
17797	tyr-6	Y73B6BL.1	4.0486300344008	0.8475	0.209330067899235	0.0245082754111248	tyr-6 is orthologous to the human gene tyrosinase (TYR), which is involved in the conversion of tyrosine to melanin.
4523	fbxb-78	E04A4.1	4.0484042661499	2.2725	0.561332280721359	0.0245082754111248	This gene encodes a protein containing an F-box, a motif predicted to mediate protein-protein interactions either with homologs of yeast Skp-1p or with other proteins; its encoded protein also contains a Pfam-B45 motif of presently unknown function.
13009	cyp-13A3	T10B9.5	4.04802503663284	0.46	0.11363566080674	0.0245082754111248	cyp-13A3 encodes one of ~80 C. elegans cytochrome P450s: membrane-associated, heme-containing NADPH-dependent monooxygenases that catalyze the oxidative metabolism of a variety of exogenous compounds and endogenous substrates.
1366	C09D4.1	C09D4.1	4.04464424437623	0.555	0.137218495983098	0.0245082754111248	C09D4.1 is an ortholog of human FLVCR2 (feline leukemia virus subgroup C cellular receptor 2) and FLVCR1 (feline leukemia virus subgroup C cellular receptor 1); C09D4.1 is involved in axonal fasciculation, dendrite development and locomotion; C09D4.1 is expressed in the intestine.
9143	fbl-1	F56H11.1	4.03833054052963	0.6525	0.161576669728086	0.0245082754111248	fbl-1 encodes proteins orthologous to the vertebrate basement membrane protein fibulin; fbl-1 activity is essential for gonad and body morphology, as well as for reproduction; fbl-1 interacts genetically with gon-1 and mig-17, which encode ADAMTS metalloproteases essential for gonad development; the FBL-1C isoform is expressed in anterior and posterior intestinal cells and localizes to the gonad …
3115	ceh-36	C37E2.4	4.03705522115099	0.56	0.138714971513404	0.0245082754111248	ceh-36 encodes a paired-like homeodomain transcription factor that is one of three orthodenticle (OTX/OTD) homeodomain proteins in C. elegans (the others being TTX-1 and CEH-37); CEH-36 is required broadly for specification of the AWC olfactory neuron and also for establishing the left-right asymmetry of the ASEL and ASER gustatory neurons; in addition, CEH-36 is sufficient to specify the AFD the…
5664	F17E9.3	F17E9.3	4.03158615352863	2.57	0.637466223498813	0.0245082754111248	None
8591	F53E10.1	F53E10.1	4.02083154869411	0.605	0.150466388027743	0.0245082754111248	F53E10.1 is an ortholog of human MARC1 (mitochondrial amidoxime reducing component 1) and MARC2 (mitochondrial amidoxime reducing component 2); F53E10.1 is predicted to have catalytic activity, molybdenum ion binding activity, and pyridoxal phosphate binding activity, based on protein domain information; F53E10.1 is expressed in the hypodermis, head, reproductive system, intestine, and the excret…
15155	lgc-55	Y113G7A.5	4.02021329914679	1.5525	0.386173539679969	0.0245082754111248	lgc-55 encodes an amine-gated chloride channel; LGC-55 activity is required for backward locomotion and suppression of lateral head oscillations in response to anterior touch; LGC-55 is expressed in neurons and muscles that receive synaptic input from tyraminergic neurons, and localizes to the neuronal cell body and regions suggestive of postsynaptic specializations; when expressed in Xenopus ooc…
17723	Y71G12B.6	Y71G12B.6	4.01991079111317	1.0775	0.268040774034596	0.0245082754111248	Y71G12B.6 is involved in embryo development; Y71G12B.6 is predicted to have catalytic activity and coenzyme binding activity, based on protein domain information.
153	faah-1	B0218.1	4.01947903903835	0.58	0.144297306782016	0.0245082754111248	faah-1 encodes a putative fatty acid amide hydrolase enzyme and is orthologous to human fatty acid amide hydrolase (FAAH); faah-1 is involved in regulating N-acylethanolamines (NAEs), which are lipid-derived signalling molecules, reduced levels of which, under dietary restriction, result in increased lifespan; faah-1 functions to hydrolyse N-acylethanolamines (NAEs) like eicosapentaenoyl ethanola…
3520	C46C11.4	C46C11.4	4.01768156806299	1.26	0.313613704484667	0.0245082754111248	None
3737	C49F8.3	C49F8.3	4.01382298264392	2.095	0.521946286385559	0.0245082754111248	None
1114	C06E4.2	C06E4.2	4.01366450916165	0.935	0.23295419880405	0.0245082754111248	None
4034	cca-1	C54D2.5	4.01352257305718	0.55	0.137036727709508	0.0245082754111248	cca-1 encodes a calcium channel alpha subunit that is homologous to vertebrate T-type calcium channel alpha 1 subunits; CCA-1 is required for regulation of pharyngeal pumping, specifically for the efficient initiation of action potentials in the pharynx in response to excitatory inputs; a CCA-1::GFP fusion protein is expressed strongly in pharyngeal muscle as well as in many neurons, including pa…
13322	T15B7.8	T15B7.8	4.0117351010331	0.8085	0.201533745284377	0.0245082754111248	None
9661	rga-5	H08M01.2	4.01128860670091	0.66	0.16453565542441	0.0245082754111248	rga-5 is an ortholog of human ARHGAP5 (Rho GTPase activating protein 5) and ARHGAP35 (Rho GTPase activating protein 35); rga-5 is involved in lipid storage.
11105	M05B5.4	M05B5.4	4.00580267975178	0.4425	0.110464752104919	0.0245082754111248	The M05B5.4 gene encodes an ortholog of the human gene LECITHIN-CHOLESTEROL ACYLTRANSFERASE (LCAT; OMIM:606967), which when mutated leads to lecithin-cholesterol acyltransferase deficiency (OMIM:245900).
15492	Y26D4A.21	Y26D4A.21	4.00546519596153	1.015	0.253403774678497	0.0245082754111248	None
17397	Y62F5A.10	Y62F5A.10	4.00544453998098	0.48	0.119836885820988	0.0245082754111248	Y62F5A.10 is predicted to have protein tyrosine phosphatase activity, based on protein domain information.
15686	fbxa-211	Y37H2A.6	4.00411572723747	0.405	0.101145927737563	0.0245082754111248	This gene encodes a protein containing an F-box, a motif predicted to mediate protein-protein interactions either with homologs of yeast Skp-1p or with other proteins; this gene's encoded protein also contains an FTH/DUF38 motif, which may also mediate protein-protein interaction.
16683	klp-20	Y50D7A.6	4.00407978542893	0.52	0.129867542073539	0.0245082754111248	klp-20 encodes one of 19 C. elegans kinesin-like proteins; KLP-20, along with KLP-11 and KAP-1, is a component of heterotrimeric kinesin-II that cooperates with OSM-3 motors to facilitate anterograde intraflagellar transport essential for formation of sensory neuron cilia.
11000	M02E1.3	M02E1.3	4.00212891749089	0.745	0.18615092500995	0.0245082754111248	None
10878	srx-76	K12G11.5	4.00191572387288	0.40725	0.101763762182848	0.0245082754111248	srx-76 is expressed in the nervous system.
10271	K06A9.1	K06A9.1	4.00176042509277	0.6275	0.156805988700699	0.0245082754111248	The K06A9.1 gene encodes an homolog of human TCOF1, which when mutated leads to Treacher-Collins syndrome (OMIM:154500).
15039	Y106G6D.2	Y106G6D.2	4.00066108518252	1.82	0.454924813986578	0.0245082754111248	None
15525	Y32B12C.1	Y32B12C.1	3.99920251725011	0.475	0.118773679990233	0.0245082754111248	None
3557	C46H11.10	C46H11.10	3.99824284518997	1.3875	0.347027445236152	0.0245082754111248	None
2380	C27A7.3	C27A7.3	3.99736916951793	0.8325	0.208261975488342	0.0245082754111248	C27A7.3 is an ortholog of human ENPP3 (ectonucleotide pyrophosphatase/phosphodiesterase 3), ENPP2 (ectonucleotide pyrophosphatase/phosphodiesterase 2) and ENPP1 (ectonucleotide pyrophosphatase/phosphodiesterase 1); C27A7.3 is predicted to have catalytic activity, based on protein domain information.
18217	nex-1	ZC155.1	3.99726690632554	0.4875	0.121958330885673	0.0245082754111248	nex-1 encodes an annexin, a member of a family of calcium-dependent phospholipid binding proteins; NEX-1 is required for efficient engulfment of apoptotic cell corpses in the pharynx, and may also function in other membrane fusion events, such as exocytosis; NEX-1 in vitro can bind phosphatidylserine, phosphatidylinositol, heparin, heparan sulfate, and chondroitin sulfate; NEX-1 is expressed in t…
7945	F45E4.5	F45E4.5	3.99426511694984	1.0225	0.255992021075661	0.0245082754111248	None
8039	F46C5.6	F46C5.6	3.99246908859709	1.05	0.262995148290292	0.0245082754111248	F46C5.6 is an ortholog of human PPP4R4 (protein phosphatase 4, regulatory subunit 4); F46C5.6 is involved in lipid storage; F46C5.6 is expressed in the pharynx and the hypodermis.
16888	Y53G8AR.7	Y53G8AR.7	3.99164623376361	0.4575	0.114614365403979	0.0245082754111248	Y53G8AR.7 is an ortholog of human MFSD8 (major facilitator superfamily domain containing 8); Y53G8AR.7 is involved in determination of adult lifespan.
1543	glt-1	C12D12.2	3.99087676152849	0.46	0.115262892714287	0.0245082754111248	glt-1 encodes a predicted plasma membrane glutamate transporter that is functional when expressed in Xenopus oocytes; expressed in the M3 pharyngeal neuron, the male tail, some anterior hypodermal cells, and in cells in the terminal bulb of the pharynx.
15761	oig-2	Y38F1A.9	3.9902487196582	0.5975	0.149740039275341	0.0245082754111248	oig-2 is involved in lipid storage; oig-2 is expressed in the pharynx, hypodermis, nervous system, midbody, and the tail; oig-2 is localized to the sarcoplasmic reticulum.
4803	unc-87	F08B6.4	3.98994349273952	0.41	0.10275834751697	0.0245082754111248	unc-87 encodes, through alternative splicing, two proteins that are required to maintain the structure of myofilaments in body wall muscle cells; UNC-87 proteins resemble the C-terminal repeat region of calponin but have no obvious orthologs outside of nematodes; in vitro, UNC-87 proteins exist as monomers in solution, associate with thin (F-actin) filaments but not with monomeric G-actin, and bu…
5681	F18A11.3	F18A11.3	3.989496286167	0.5425	0.135982079211614	0.0245082754111248	F18A11.3 is an ortholog of human C18orf32 (chromosome 18 open reading frame 32).
14404	W02B12.1	W02B12.1	3.9867049775042	0.6225	0.15614398444645	0.0245082754111248	W02B12.1 is an ortholog of human PLB1 (phospholipase B1); W02B12.1 is predicted to have hydrolase activity, acting on ester bonds, based on protein domain information.
451	jnk-1	B0478.1	3.9840690805058	1.25	0.313749579824381	0.0245082754111248	jnk-1 encodes a serine/threonine kinase that is the sole C. elegans member of the c-Jun N-terminal kinase (JNK) subgroup of mitogen-activated protein (MAP) kinases; jnk-1 is required for normal coordinated locomotion as well as for normal adult lifespan and response to heat and oxidative stress; JNK-1 exhibits kinase activity in vitro that is dependent upon activation by the JKK-1/MAPKK; in addit…
3025	C36A4.5	C36A4.5	3.98242612112682	0.7025	0.176400008093867	0.0245082754111248	maph-1.3 is an ortholog of human MAP1B (microtubule-associated protein 1B), MAP1A (microtubule-associated protein 1A) and MAP1S (microtubule-associated protein 1S); maph-1.3 is involved in lipid storage.
7175	F36H9.2	F36H9.2	3.98117745491647	1.42694444444444	0.358422718053492	0.0245082754111248	F36H9.2 is predicted to have transmembrane receptor protein serine/threonine kinase activity, based on protein domain information.
14972	pqn-79	Y105C5A.6	3.97673035638436	1.4125	0.355191293704974	0.0245082754111248	The protein product of this gene is predicted to contain a glutamine/asparagine (Q/N)-rich ('prion') domain, by the algorithm of Michelitsch and Weissman (as of the WS77 release of WormBase, i.e., in wormpep77).
3626	gasr-8	C47E8.6	3.97654905890203	0.99	0.248959584135836	0.0245082754111248	gasr-8 is involved in embryo development and gamete generation; gasr-8 is expressed in all sensory neurons, head neurons, tail neurons, and the ciliated neurons.
6823	tba-6	F32H2.9	3.9756446422865	1.435	0.360947752909499	0.0245082754111248	tba-6 encodes an alpha-tubulin; tba-6 transcripts are enriched in ciliated neurons, suggesting that TBA-6 is a likely structural component of cilia.
9244	F57G12.1	F57G12.1	3.97297773474882	0.5475	0.137805957282722	0.0245082754111248	None
6155	gcy-13	F23H12.6	3.97156462875203	0.795	0.200172998380693	0.0245082754111248	gcy-13 encodes a predicted guanylate cyclase.
5164	F11C7.6	F11C7.6	3.97010986209241	1.065	0.268254541308512	0.0245082754111248	F11C7.6 is an ortholog of human ISM2 (isthmin 2).
17317	Y59E9AR.7	Y59E9AR.7	3.96898885940649	0.6125	0.154321420819405	0.0245082754111248	Y59E9AR.7 is expressed in the germ line.
13044	col-167	T10E10.2	3.96768243472562	1.27	0.320086100864528	0.0245082754111248	col-167 is an ortholog of human MARCO (macrophage receptor with collagenous structure); col-167 is involved in body morphogenesis and locomotion; col-167 is a structural constituent of cuticle, based on protein domain information.
2812	lgc-21	C33G3.3	3.9672539872359	2.2975	0.57911593444531	0.0245082754111248	lgc-21 is an ortholog of human ZACN (zinc activated ligand-gated ion channel) and members of the Cholinergic receptors, nicotinic family including CHRNG and 5-hydroxytryptamine (serotonin) receptors, ionotropic family including HTR3B; lgc-21 is predicted to have extracellular ligand-gated ion channel activity, based on protein domain information.
2803	fbxb-88	C33F10.13	3.96339928456672	1.895	0.478124928613434	0.0245082754111248	None
544	BE0003N10.3	BE0003N10.3	3.96259044221036	0.615	0.155201504916806	0.0245082754111248	BE0003N10.3 is an ortholog of human FBXO11 (F-box protein 11); BE0003N10.3 is predicted to have zinc ion binding activity, based on protein domain information.
11156	M153.5	M153.5	3.96113449179874	1.27	0.320615218349553	0.0245082754111248	None
11783	npr-24	R106.2	3.9594089698753	0.7225	0.182476729607135	0.0245082754111248	npr-24 is an ortholog of human MCHR1 (melanin-concentrating hormone receptor 1) and members of the SSTR (Somatostatin receptors) family including SSTR2, OPR (Opioid receptors) family including OPRM1 and Neuropeptide receptors family including NPBWR2; npr-24 is predicted to have G-protein coupled receptor activity, based on protein domain information.
2228	kqt-1	C25B8.1	3.95772040267258	0.66	0.166762664576889	0.0245082754111248	kqt-1 encodes one of three C. elegans KCNQ-like potassium channel subunits that, with respect to humans, is most similar to the KCNQ2-5 subfamily of channel proteins; although loss of KQT-1 activity via large-scale RNAi screens results in no obvious abnormalities, KQT-1 likely functions to regulate cellular excitability as expression of KQT-1 in Xenopus oocytes can produce K+ channel currents tha…
12980	unc-10	T10A3.1	3.95698593712282	1.0525	0.26598527685577	0.0245082754111248	unc-10 encodes a protein with zinc-finger, Q/N-rich, PDZ, and C2 domains that is homologous to vertebrate Rim1, a presynaptic protein which binds, and effects the activity of, synaptic vesicle-associated GTP-Rab3; UNC-10 is required for normal locomotion and synaptic transmission, and localizes to a subdomain of presynaptic termini, where it probably acts to regulate the priming step of presynapt…
17941	pqn-92	Y75B8A.27	3.95608763066818	0.485	0.122595868766963	0.0245082754111248	The protein product of this gene is predicted to contain a glutamine/asparagine (Q/N)-rich ('prion') domain, by the algorithm of Michelitsch and Weissman (as of the WS77 release of WormBase, i.e., in wormpep77).
7362	psa-3	F39D8.2	3.9542765888711	0.6325	0.159953403810979	0.0245082754111248	psa-3 encodes a Meis-related protein; along with nob-1 and ceh-20, psa-3 is required for the proper asymmetric cell division of the T hypodermal cell; a PSA-3::GFP reporter fusino is expressed in the T hypodermal cell, head neurons, posterior gut cells, hypodermal cells (hyp7, hyp9, and hyp10), and the P blast cells; psa-3 expression is regulated by the POP-1 TCF transcription factor, as well as …
1829	math-15	C16C4.5	3.95186387144615	0.5625	0.142337898849273	0.0245082754111248	None
18060	Y82E9BR.17	Y82E9BR.17	3.95175362340553	2.48	0.62756948846998	0.0245082754111248	None
6222	F25G6.1	F25G6.1	3.95050239004908	0.5425	0.137324306236721	0.0245082754111248	None
9850	H41C03.2	H41C03.2	3.94830828207752	0.465	0.117771958717298	0.0245082754111248	None
6147	pef-1	F23H11.8	3.94609506331441	1.1875	0.300930408656347	0.0245082754111248	pef-1 encodes an ortholog of the rhodopsin-specific serine/threonine phosphatase RdgC in D. melanogaster and of RdgC-related proteins in humans (PPEF1 and PPEF2; OMIM:300109 and OMIM:602256); PEF-1 has a EF-hand calcium-binding domain, and is peripherally bound to the plasma membrane by myristoylation and palmitoylation; pef-1 has no known mutant phenotype, but is expressed in several anterior am…
9201	mig-17	F57B7.4	3.94570376386	1.0475	0.265478622494267	0.0245082754111248	mig-17 encodes a secreted metalloprotease that is a member of the ADAM (A Disintegrin And Metalloprotease) protein family; MIG-17 activity is required for proper migration of gonadal leader cells, namely the hermaphrodite distal tip cells (DTCs) and the male linker cell (MLC); a MIG-17::GFP translational fusion protein is first detected in late embryos with expression continuing through adulthood…
13345	nep-21	T16A9.4	3.94521956677853	0.5225	0.132438763205934	0.0245082754111248	T16A9.4 encodes a neprilysin; neprilysins are thermolysin-like zinc metallopeptidases, found on the outer surface of animal cells, that negatively regulate small signalling peptides (e.g., enkephalin, tachykinin, insulin, and natriuretic peptides) by cleaving them; while T16A9.4 has no clear orthologs in other organisms, it falls into a group of proteins that includes the classical neprilysins fo…
18744	ptr-23	ZK270.1	3.94416039304638	0.71	0.180012963279014	0.0245082754111248	ptr-23 encodes a nematode-specific member of the sterol sensing domain (SSD) proteins, distantly paralogous to Drosophila PATCHED (PTC) and human PTCH (OMIM:601309, mutated in basal cell nevus syndrome); PTR-23 is strongly required for normal molting from L4 to adult stages (a role conserved in C. briggsae); PTR_23 also functions in a pathway with the mucin-like protein OSM-8 to regulate the osmo…
12843	rps-17	T08B2.10	3.94272239823809	0.35	0.0887711496392459	0.0245082754111248	rps-17 encodes a small ribosomal subunit S17 protein.
15785	Y38H6C.16	Y38H6C.16	3.941002711086	0.7975	0.202359667948627	0.0245082754111248	Y38H6C.16 is predicted to have cholestenol delta-isomerase activity, based on protein domain information.
9447	rpa-3	F59A3.5	3.93808659735573	0.3775	0.0958587351160528	0.0245082754111248	None
19207	ZK899.1	ZK899.1	3.93646430740841	0.485	0.123207010689067	0.0245082754111248	None
11273	acr-12	R01E6.4	3.93595060356957	0.96	0.243905500015514	0.0245082754111248	acr-12 encodes a nicotinic acetylcholine receptor (nAChR) alpha subunit that is a member of the ACR-8-like group of C. elegans nAChR subunits; as an nAChR subunit, ACR-12 is predicted to mediate fast excitatory neurotransmission, however loss of acr-12 activity via mutation or RNAi results in no obvious defects; ACR-12 copurifies with UNC-29 and LEV-1, suggesting that ACR-12 can form receptors wi…
8535	jbts-14	F53A9.4	3.93549570814327	1.6675	0.423707741962374	0.0245082754111248	jbts-14 is involved in lipid storage; jbts-14 is expressed in all inner labial neurons, certain amphid neurons, and certain sensory neurons.
12516	T05B4.8	T05B4.8	3.93514605839719	0.845	0.214731546799097	0.0245082754111248	None
12932	T09B4.4	T09B4.4	3.93045465343486	1.1225	0.285590370319891	0.0245082754111248	T09B4.4 is an ortholog of human CALML4 (calmodulin-like 4), CETN2 (centrin, EF-hand protein, 2) and CETN1 (centrin, EF-hand protein, 1).
4772	F07H5.5	F07H5.5	3.92848405624666	0.5125	0.130457446857924	0.0245082754111248	None
4433	pqn-26	DY3.5	3.92772996685304	2.0725	0.527658473848833	0.0245082754111248	The protein product of this gene is predicted to contain a glutamine/asparagine (Q/N)-rich ('prion') domain, by the algorithm of Michelitsch and Weissman (as of the WS77 release of WormBase, i.e., in wormpep77).
3904	C52B11.5	C52B11.5	3.92713529472904	0.76	0.19352529081951	0.0245082754111248	C52B11.5 is an ortholog of human RAB20 (RAB20, member RAS oncogene family); C52B11.5 is predicted to have GTP binding activity, based on protein domain information.
8015	F46B3.7	F46B3.7	3.92608266763844	1.3275	0.338123292956157	0.0245082754111248	None
13356	T16G1.7	T16G1.7	3.92498726929567	2.015	0.513377461313801	0.0245082754111248	T16G1.7 is orthologous to the human gene ALIAS DLC1~CANDIDATE TUMOR SUPPRESSOR GENE (DLEC1; OMIM:604050), which when mutated leads to disease.
11237	M79.2	M79.2	3.92300889648839	0.7	0.178434466622442	0.0245082754111248	M79.2 is an ortholog of human AGPAT6 (1-acylglycerol-3-phosphate O-acyltransferase 6) and AGPAT9 (1-acylglycerol-3-phosphate O-acyltransferase 9); M79.2 is predicted to have transferase activity, transferring acyl groups, based on protein domain information; M79.2 is localized to the striated muscle dense body.
5180	F11D5.7	F11D5.7	3.92231897468326	0.5275	0.134486767497689	0.0245082754111248	F11D5.7 is predicted to have transmembrane transporter activity, based on protein domain information.
5305	rhgf-1	F13E6.6	3.92151763706771	1.0625	0.270941022923584	0.0245082754111248	rhgf-1 encodes an RGS RhoGEF (Regulator of G-protein Signaling Rho Guanine Nucleotide Exchange Factor); RHGF-1 functions within cholingergic motor neurons in one of four G-protein-mediated signaling pathways that control locomotion via regulation of acetylcholine (ACh) release at neuromuscular junctions; in regulating ACh release, RHGF-1 functions downstream of the C. elegans Galpha12 ortholog, G…
1297	fbxb-13	C08F1.3	3.92059002164441	2.1525	0.549024506035237	0.0245082754111248	This gene encodes a protein containing an F-box, a motif predicted to mediate protein-protein interactions either with homologs of yeast Skp-1p or with other proteins; its encoded protein also contains a Pfam-B45 motif of presently unknown function.
17490	oac-56	Y67A10A.1	3.91920687068869	1.4525	0.370610699543085	0.0245082754111248	oac-56 is predicted to have transferase activity, transferring acyl groups other than amino-acyl groups, based on protein domain information.
12447	cutl-11	T04F8.4	3.91896524802315	0.825	0.210514752692986	0.0245082754111248	None
10442	K08B12.1	K08B12.1	3.91836769870593	0.6975	0.178007796519544	0.0245082754111248	K08B12.1 is expressed in the hypodermis.
1486	acy-2	C10F3.3	3.91644390123067	0.5775	0.147455195213835	0.0245082754111248	acy-2 encodes an adenylyl cyclase; an intragenic deletion of acy-2 is lethal at the first larval stage of development; the terminal phenotype resembles that seen in loss-of-function gsa-1 mutants.
2093	C23G10.12	C23G10.12	3.91085257941842	0.94	0.240356797120639	0.0262945804018572	C. elegans ncRNA gene
9364	col-104	F58F6.1	3.91035920082458	3.2325	0.826650400637968	0.0262945804018572	col-104 is an ortholog of human ADIPOQ (adiponectin, C1Q and collagen domain containing), C1QTNF9B (C1q and tumor necrosis factor related protein 9B), C1QTNF9 (C1q and tumor necrosis factor related protein 9), OTOL1 (otolin 1) and C1QTNF2 (C1q and tumor necrosis factor related protein 2) and members of the COL (Collagens) family including COL4A2; col-104 is a structural constituent of cuticle, ba…
2773	ceh-31	C33D12.1	3.90941253570151	0.94175	0.240892970849138	0.0262945804018572	ceh-31 encodes a protein containing a homeobox domain.
9359	hrg-3	F58E6.7	3.90891782954633	1.9225	0.491824101665274	0.0262945804018572	hrg-3 is expressed in the intestinal cell.
12697	T06G6.3	T06G6.3	3.90844494992499	0.9675	0.247540904987946	0.0262945804018572	None
10699	K10B4.3	K10B4.3	3.9068105834099	1.1875	0.30395637941667	0.0262945804018572	K10B4.3 is an ortholog of human VEPH1 (ventricular zone expressed PH domain-containing 1); K10B4.3 is involved in determination of adult lifespan.
5373	F14B8.6	F14B8.6	3.90362304276019	0.6625	0.169714132933173	0.0262945804018572	F14B8.6 is an ortholog of human CLEC14A (C-type lectin domain family 14, member A) and FBLN7 (fibulin 7) and members of the CD (CD molecules) family including CD248.
1711	C14H10.2	C14H10.2	3.90189014190012	0.7025	0.180040947964235	0.0262945804018572	C14H10.2 is an ortholog of human JAKMIP3 (Janus kinase and microtubule interacting protein 3), JAKMIP2 (janus kinase and microtubule interacting protein 2) and JAKMIP1 (janus kinase and microtubule interacting protein 1).
9328	fbxc-26	F58E1.12	3.90186939371167	1.7475	0.447862248494607	0.0262945804018572	None
8512	F52H3.5	F52H3.5	3.901635293323	0.6325	0.162111512852679	0.0262945804018572	F52H3.5 is an ortholog of human TTC36 (tetratricopeptide repeat domain 36); F52H3.5 is expressed in the pharynx, hypodermis, and the intestine.
5970	F21H7.3	F21H7.3	3.90005623413502	0.865	0.221791673778736	0.0262945804018572	F21H7.3 is expressed in the body wall musculature.
19134	nhx-9	ZK822.3	3.89961596481139	0.925	0.237202844676716	0.0262945804018572	nhx-9 encodes a sodium/proton exchanger expressed intracellularly within the excretory cell, in distinct, large aggregates; nhx-9 has no known mutant or RNAi phenotype; NHX-9 is thought to prevent intracellular acidification by catalysing the electroneutral exchange of vesicular sodium for an intracellular proton.
16842	Y53F4B.17	Y53F4B.17	3.89748322891218	0.44	0.112893365835677	0.0262945804018572	None
4974	mlc-3	F09F7.2	3.8954975310636	0.395	0.101399114452051	0.0262945804018572	mlc-3 encodes an essential myosin light chain; large-scale RNAi screens indicate that mlc-3 activity is required for both embryonic and postembryonic development, as well as for normal locomotion and egg laying.
16588	Y49A3A.4	Y49A3A.4	3.89545619352682	0.4975	0.127712898126466	0.0262945804018572	None
12134	igcm-2	SSSD1.1	3.89540968809262	2.09	0.536528932088621	0.0262945804018572	igcm-2 encodes a protein containing immunoglobulin and fibronectin repeats; igcm-2 promoter::gfp fusions are expressed in the PVT interneuron, in some head neurons, and in the pharynx and intestine.
18366	ZC412.3	ZC412.3	3.89380228315343	0.6675	0.171426269610027	0.0262945804018572	Uncharacterized protein ZC412.3
72	B0034.1	B0034.1	3.88923564834514	1.2325	0.316900314467812	0.0262945804018572	B0034.1 is expressed in the vulval cell, hypodermis, tail, vulC, vulE, and the vulF.
2307	nhr-31	C26B2.3	3.88872550209076	0.715	0.183864867709377	0.0262945804018572	nhr-31 encodes one of over 200 C. elegans nuclear receptors; nhr-31 activity is required for proper growth, development, and function of the excretory cell; in regulating excretory cell development, NHR-31 appears to function by controlling the expression of genes encoding subunits of the vacuolar ATPase; an nhr-31::gfp promoter fusion is expressed at high levels in the excretory cell beginning a…
19032	tnc-2	ZK673.7	3.88592555324494	1.18	0.303659960498894	0.0262945804018572	tnc-2 encodes pharyngeal muscle troponin C, the calcium-binding component of the troponin complex of actin thin filaments; TNC-2 is essential for postembryonic development, and by homology, likely functions to regulate pharyngeal muscle contraction in response to changes in intracellular calcium; TNC-2 is expressed exclusively in pharyngeal muscle.
15300	unc-3	Y16B4A.1	3.88483536606871	0.75	0.193058374249452	0.0262945804018572	unc-3 is an ortholog of human EBF4 (early B-cell factor 4), EBF3 (early B-cell factor 3), EBF1 (early B-cell factor 1) and EBF2 (early B-cell factor 2); unc-3 is involved in dauer larval development, locomotion and neuron development; unc-3 is predicted to have DNA binding activity, based on protein domain information; unc-3 is expressed in certain interneurons, certain ventral cord neurons, cert…
14109	T26H5.8	T26H5.8	3.88333914438001	0.7275	0.187338775458961	0.0262945804018572	T26H5.8 is predicted to have galactoside 2-alpha-L-fucosyltransferase activity, based on protein domain information.
1074	nhr-150	C06B8.1	3.88041717888689	1.345	0.346612216675583	0.0262945804018572	nhr-150 is involved in reproduction; nhr-150 is predicted to have sequence-specific DNA binding activity, transcription factor activity, sequence-specific DNA binding, and zinc ion binding activity, based on protein domain information; nhr-150 is expressed in the seam cell.
18428	ZC487.1	ZC487.1	3.88009117712132	0.8025	0.206825036672304	0.0262945804018572	ZC487.1 is involved in striated muscle myosin thick filament assembly; ZC487.1 is predicted to have ATP binding activity, based on protein domain information.
3693	C49A9.3	C49A9.3	3.87917363010276	0.6	0.154672117624213	0.0262945804018572	None
3226	acr-9	C40C9.2	3.87692476834952	0.9775	0.252132826507268	0.0262945804018572	acr-9 encodes a predicted member of the alpha subunit family of nicotinic acetylcholine receptors.
16093	Y42A5A.4	Y42A5A.4	3.87575288310554	2.1225	0.547635534053786	0.0262945804018572	cdkl-1 is an ortholog of human CDKL4 (cyclin-dependent kinase-like 4) and CDKL1 (cyclin-dependent kinase-like 1 (CDC2-related kinase)); cdkl-1 is predicted to have ATP binding activity and protein kinase activity, based on protein domain information.
17651	Y71D11A.3	Y71D11A.3	3.87563479021338	0.935	0.241250801639265	0.0262945804018572	Y71D11A.3 is an ortholog of human ACMSD (aminocarboxymuconate semialdehyde decarboxylase).
2262	ddr-1	C25F6.4	3.87429637820515	0.63	0.162610171886711	0.0262945804018572	The C25F6.4 gene encodes a protein tyrosine kinase homolog that is also homologous to human RS1.
1565	fipr-6	C12D8.17	3.87369694689556	1.0375	0.267831999824217	0.0262945804018572	None
18110	Y92H12BL.4	Y92H12BL.4	3.87341938256889	0.615	0.158774441716178	0.0262945804018572	Y92H12BL.4 is an ortholog of human ARHGAP39 (Rho GTPase activating protein 39); Y92H12BL.4 is predicted to have 4 iron, 4 sulfur cluster binding activity and catalytic activity, based on protein domain information.
11652	grd-1	R08B4.1	3.87277137602173	1.1325	0.29242624726362	0.0262945804018572	grd-1 encodes a hedgehog-like protein, with (from N- to C-terminus) a signal sequence, a Ground domain, an extended region of low-complexity sequence, and a Hint/Hog domain; GRD-1 is expressed in rectal cells; the Hint/Hog domain is predicted to cut GRD-1 into two halves and then covalently link cholesterol to the C-terminus of the Ground domain; the Ground domain is predicted to form a cysteine-…
13832	bus-8	T23F2.1	3.87261872686649	1.3225	0.34150018198928	0.0262945804018572	bus-8 encodes a glycosyltransferase related to mannosyltransferases that play a role in protein N-linked glycosylation ; bus-8 is required for colonization by Microbacterium nematophilum and the tail-swelling response to M. nematophilum infection; bus-8 is also essential for enclosure during embryonic morphogenesis, functioning in or with ephrin-mediated signaling to effect the proper neuroblast …
1562	fipr-4	C12D8.14	3.87219014276024	1.4475	0.373819452721443	0.0262945804018572	None
18551	cdh-3	ZK112.7	3.87185336585681	0.5025	0.129782807487287	0.0262945804018572	cdh-3 encodes a member of the cadherin superfamily that affects morphogenesis of tail epithelia and excretory function; expressed predominantly in developing epithelial cells, and also expressed in the AC, excretory cell, various neurons, and vulval cells during different stages of development.
3417	C44C10.9	C44C10.9	3.86980221069604	1.2675	0.327536119674711	0.0262945804018572	None
15765	vha-3	Y38F2AL.4	3.86629169482622	0.805	0.208209846421374	0.0262945804018572	vha-3 and vha-2 encode an ortholog of subunit c of the membrane-bound (V0) domain of vacuolar proton-translocating ATPase (V-ATPase); the protein encoded by vha-2 and vha-3 (VHA-2/3) is identical; VHA-2/3 is a predicted V-ATPase transmembrane rotor component; VHA-1 and VHA-2/3 comprise a closely related family of subunit c co-orthologs, predicted to carry protons from the cytosol to a-subunits (V…
1850	C16D9.1	C16D9.1	3.86609579573289	1.0075	0.260598819385697	0.0262945804018572	None
3699	C49A9.9	C49A9.9	3.86176428227091	0.515	0.133358735116053	0.0262945804018572	C49A9.9 is involved in embryo development and reproduction.
6489	F28C6.5	F28C6.5	3.86025846209788	1.32	0.341946015522142	0.0262945804018572	F28C6.5 is involved in embryo development.
7629	F42A10.7	F42A10.7	3.8527991655065	0.79	0.205045725474804	0.0262945804018572	None
13769	T23B12.11	T23B12.11	3.85224526593901	0.8575	0.222597457016013	0.0262945804018572	None
16127	Y43D4A.10	Y43D4A.10	3.84847598350139	0.51	0.13251999029912	0.0262945804018572	Y43D4A.10 is involved in embryo development.
18466	set-30	ZC8.3	3.84840570432174	1.1975	0.311167816494818	0.0262945804018572	set-30 encodes a divergent ortholog of human SMYD1 (OMIM:606846), SMYD2 (OMIM:610663), and SYMD3 (OMIM:608783); SET-30 is paralogous to SET-10, SET-14, and SET-18; neither set-30(gk314) nor set-30(RNAi) have any obvious phenotypes.
1708	tnt-3	C14F5.3	3.84817071452964	0.6	0.155918238693144	0.0262945804018572	tnt-3 is orthologous to the human gene TROPONIN T (TNNT2; OMIM:191045), which when mutated leads to disease.
5300	F13E6.1	F13E6.1	3.84695600892374	0.455	0.118275332222293	0.0262945804018572	F13E6.1 is an ortholog of human TPD52L2 (tumor protein D52-like 2), TPD52 (tumor protein D52), TPD52L1 (tumor protein D52-like 1) and TPD52L3 (tumor protein D52-like 3); F13E6.1 is involved in lipid storage; F13E6.1 is expressed in the pharynx, nervous system, head, and the tail.
6948	nspb-11	F35C5.10	3.8459192860195	1.03	0.267816332949109	0.0262945804018572	None
149	nlp-31	B0213.6	3.84575820229022	1.36	0.353636377656321	0.0262945804018572	nlp-31 encodes five predicted neuropeptide-like proteins; in C. elegans, nlp-31 is part of the YGGWamide neuropeptide family that also contains nlp-24, nlp-25, and nlp-27-32; nlp-31 is expressed in the hypodermis, and its expression is also detected in precomma-stage embryos; nlp-31 expression is upregulated in response to fungal infection and, when synthesized in vitro, demonstrates antifungal a…
2825	nhr-139	C33G8.8	3.84272926391367	0.6575	0.171102348056225	0.0262945804018572	nhr-139 is involved in reproduction; nhr-139 is predicted to have sequence-specific DNA binding activity, transcription factor activity, sequence-specific DNA binding, and zinc ion binding activity, based on protein domain information.
1567	daf-36	C12D8.5	3.84002371642631	0.875	0.227863176015567	0.0262945804018572	daf-36 encodes a protein homologous to the catalytic subunit of Rieske-like oxygenases; DAF-36 functions in a hormone biosynthetic pathway producing a ligand for the DAF-12 nuclear receptor that regulates the developmental decision between reproductive growth and dauer formation; a daf-36::gfp reporter fusion is expressed in the intestine, the head mesodermal cell, two unidentified head neurons (…
7572	npr-6	F41E7.3	3.84001877715198	0.5025	0.130858735116053	0.0262945804018572	npr-6 is an ortholog of human PRLHR (prolactin releasing hormone receptor); npr-6 is predicted to have neuropeptide Y receptor activity, based on protein domain information; npr-6 is expressed in the nervous system.
15589	tor-1	Y37A1B.12	3.83985367057243	0.725	0.188809278217084	0.0262945804018572	tor-1 encodes a AAA+ ATPase that, along with TOR-2 and OOC-5, comprise the three C. elegans orthologs of human TorsinA.
1692	C14C6.5	C14C6.5	3.83961325192955	0.9875	0.25718736112387	0.0262945804018572	C14C6.5 encodes a protein that contains a Metridin-like ShK toxin domain; C14C6.5 is involved in the transcriptional, innate immune response towards several different bacterial pathogens.
8281	F48G7.12	F48G7.12	3.83917839588012	2.0075	0.522898337351106	0.0262945804018572	None
13126	T11G6.4	T11G6.4	3.83821838823962	0.9625	0.250767388054083	0.0262945804018572	T11G6.4 is an ortholog of human SLC37A3 (solute carrier family 37, member 3); T11G6.4 is predicted to have transporter activity, based on protein domain information.
5	nas-6	4R79.1	3.83757524713969	1.2675	0.330286683223925	0.0262945804018572	nas-6 encodes an astacin-like metalloprotease.
4354	aex-1	D2030.10	3.83736999956617	0.4525	0.11791930412005	0.0262945804018572	aex-1 encodes a novel, C2 calcium-binding domain protein that is similar to human BAP3 proteins and rat Munc13; in C. elegans, AEX-1 functions in retrograde signaling to regulate presynaptic activity and localization of the synaptic vesicle fusion protein UNC-13; AEX-1 is required for the defecation motor program, specifically the anterior body wall and enteric muscle contractions, and for normal…
7667	tni-1	F42E11.4	3.83436416544818	1.51	0.393807143725876	0.0262945804018572	tni-1 encodes a member of the troponin family that affects body morphology, locomotion, egg laying, and epithelial morphogenesis in a large-scale RNAi analysis.
3315	C42D4.3	C42D4.3	3.83143132322372	1.7375	0.453485878624098	0.0262945804018572	C42D4.3 is an ortholog of human FAM46C (family with sequence similarity 46, member C), FAM46D (family with sequence similarity 46, member D), FAM46B (family with sequence similarity 46, member B) and FAM46A (family with sequence similarity 46, member A); C42D4.3 is expressed in the spermatheca, hypodermis, and the vulva.
12464	lrx-1	T04H1.6	3.82991843166169	1.735	0.453012258866107	0.0262945804018572	lrx-1 encodes a protein that contains four class A low-density lipoprotein receptor domains.
3483	ilys-3	C45G7.3	3.82830029327557	0.69	0.180236644761642	0.0262945804018572	ilys-3 is involved in defense response; ilys-3 is predicted to have lysozyme activity, based on protein domain information; ilys-3 is expressed in the intestinal cell.
11179	M176.5	M176.5	3.82814232355988	0.795	0.207672529599346	0.0262945804018572	M176.5 is expressed in the pharynx and the nervous system.
15791	Y38H6C.23	Y38H6C.23	3.82812006293876	0.815	0.212898233754545	0.0262945804018572	None
4415	D2096.6	D2096.6	3.82782758376154	2.1025	0.549267163682933	0.0262945804018572	D2096.6 is involved in endoplasmic reticulum unfolded protein response and nematode larval development; D2096.6 is expressed in the epithelial cell and the pharynx.
12838	tnt-4	T08B1.2	3.82763647527475	1.42	0.370986118763556	0.0262945804018572	tnt-4 is involved in muscle contraction.
10533	K08F4.12	K08F4.12	3.8274767438464	1.015	0.265187764140398	0.0262945804018572	None
15758	Y38F1A.6	Y38F1A.6	3.82598320592109	0.57	0.148981312599038	0.0262945804018572	Y38F1A.6 is an ortholog of human ADHFE1 (alcohol dehydrogenase, iron containing, 1); Y38F1A.6 is predicted to have metal ion binding activity and oxidoreductase activity, based on protein domain information; Y38F1A.6 is expressed in the pharynx, anal depressor muscle, hypodermis, reproductive system, intestine, and the body wall musculature.
14840	W09D6.5	W09D6.5	3.82211187453437	0.71	0.185761176885095	0.0262945804018572	None
12961	ztf-27	T09F3.1	3.82075588329283	0.56	0.14656785649372	0.0262945804018572	ztf-27 is an ortholog of members of the human Zinc fingers, C2H2-type family including ZBTB43; ztf-27 is involved in embryo development and lipid storage; ztf-27 is predicted to have nucleic acid binding activity, based on protein domain information.
3900	mpz-1	C52A11.4	3.82047143845162	0.7125	0.186495308623159	0.0262945804018572	mpz-1 encodes a multi-PDZ domain scaffold protein; mpz-1(RNAi) animals have reduced serotonin (5-HT)-stimulated egg laying unless truncated SER-1 is transgenically expressed in vulval muscle; overexpressed MPZ-1 PDZ domain 10 also reduces SER-1-mediated egg laying; the PDZ domain 10 of MPZ-1 binds the C-terminal PDZ-binding motif (ETFL) of the 5-HT receptor SER-1; MPZ-1 also physically interacts …
7861	F44F1.6	F44F1.6	3.82016615678333	1.5425	0.403778248561529	0.0262945804018572	F44F1.6 is localized to the cytoplasm.
15298	Y15E3A.4	Y15E3A.4	3.81954446005622	0.7925	0.207485475895818	0.0262945804018572	Y15E3A.4 is an ortholog of members of the human SLC (Solute carriers) family including SLC37A1; Y15E3A.4 is localized to the plasma membrane.
5291	alh-8	F13D12.4	3.81829945836192	0.365	0.0955922928466664	0.0262945804018572	alh-8 is orthologous to the human gene METHYLMALONATE-SEMIALDEHYDE DEHYDROGENASE (ALDH6A1; OMIM:603178), which when mutated leads to MMSDH deficiency.
4422	DC2.5	DC2.5	3.81773995352087	0.565	0.147993317218721	0.0262945804018572	DC2.5 is an ortholog of human WWOX (WW domain containing oxidoreductase); DC2.5 is predicted to have oxidoreductase activity, based on protein domain information.
1566	fipr-5	C12D8.18	3.81715068787372	1.17	0.306511347250933	0.0262945804018572	None
6668	clec-264	F31D4.4	3.8138088943635	0.8475	0.222218790577718	0.0262945804018572	clec-264 is involved in defense response to Gram-positive bacterium.
848	C04C3.4	C04C3.4	3.81293979528303	0.3375	0.0885143794867991	0.0262945804018572	C04C3.4 is an ortholog of human CCNA1 (cyclin A1), CCNO (cyclin O) and CCNA2 (cyclin A2).
9804	H28G03.1	H28G03.1	3.80991288466418	0.33	0.0866161536995583	0.0262945804018572	H28G03.1 is an ortholog of members of the human RBM (RNA binding motif containing) family including HNRNPA1L2; H28G03.1 is predicted to have nucleic acid binding activity and nucleotide binding activity, based on protein domain information.
11055	calu-1	M03F4.7	3.80988518033529	0.4325	0.113520481465517	0.0262945804018572	calu-1 is an ortholog of human CALU (calumenin), RCN1 (reticulocalbin 1, EF-hand calcium binding domain) and RCN3 (reticulocalbin 3, EF-hand calcium binding domain); calu-1 is involved in body morphogenesis, cuticle development, determination of adult lifespan, locomotion, the molting cycle and nematode larval development; calu-1 is predicted to have calcium ion binding activity, based on protein…
6654	rrn-2.1	F31C3.11	3.8091036219198	0.5175	0.135858735116053	0.0262945804018572	rrn-2.1 (F31C3.11) encodes a 5.8s ribosomal RNA (rRNA), a non-coding component of the large ribosomal subunit. This is cleaved from a 45S precursor transcribed by RNA polymerase I; As this forms a major component of the ribosome, it is essential for all protein synthesis in the cell.
14670	W05H9.3	W05H9.3	3.80896052847982	0.64	0.16802484436756	0.0262945804018572	C. elegans potential ncRNA gene
16037	Y41D4A.3	Y41D4A.3	3.80885611307687	1.4075	0.369533518257006	0.0262945804018572	None
2755	C33A12.4	C33A12.4	3.80523345679858	1.3675	0.359373482737773	0.0262945804018572	C33A12.4 is expressed in certain interneurons, all inner labial neurons, certain amphid neurons, and certain sensory neurons.
3564	phat-1	C46H11.8	3.80433351642865	2.0375	0.535573443075181	0.0262945804018572	phat-1 is expressed in the g1P, g1AR, and the pharyngeal gland cell.
6074	F22H10.2	F22H10.2	3.8027696695904	0.4925	0.129510867812577	0.0262945804018572	F22H10.2 is involved in innate immune response.
14457	ssp-37	W02D9.5	3.80065782300871	0.515	0.135502858710998	0.0262945804018572	None
7527	F41C3.1	F41C3.1	3.79985268054241	1.0975	0.288826986798693	0.0262945804018572	None
9354	F58E6.11	F58E6.11	3.79968280735511	0.615	0.161855615634424	0.0262945804018572	F58E6.11 is expressed in the pharynx.
2854	max-1	C34B4.1	3.79792567120495	0.855	0.225122889181962	0.0262945804018572	max-1 encodes a novel, conserved PH/MyTH4/FERM domain-containing protein; max-1 activity is required cell-autonomously in motor neurons for UNC-6-mediated, dorsally directed axon guidance, proper axon extension and axon fasciculation in the nerve cords, and fully normal backward locomotion; genetic analyses indicate that max-1 likely acts downstream of unc-6 and unc-5, and in parallel to unc-40 a…
2260	dlg-1	C25F6.2	3.79747789626001	0.7	0.184332870163485	0.0262945804018572	dlg-1 encodes a MAGUK protein, orthologous to Drosophila Discs large; DLG-1 is physically located at apical adherens junctions in all epithelia and is required for organization of the embryonic gut epithelium into a coherent tube.
7183	F37A4.3	F37A4.3	3.79616141604142	0.5825	0.153444476185478	0.0262945804018572	Uncharacterized protein F37A4.3
19123	ZK813.2	ZK813.2	3.79506329785459	0.8675	0.228586437672966	0.0262945804018572	None
15600	nkcc-1	Y37A1C.1	3.79364352333354	0.3275	0.0863286173267593	0.0262945804018572	The Y37A1C.1 gene encodes a homolog of the human gene NKCC2, which when mutated leads to hypokalemicalkalosis (OMIM:241200); the Y37A1C.1A protein is predicted to be mitochondrial with 52% accuracy.
2566	C30B5.7	C30B5.7	3.79342569677548	0.8875	0.233957396543815	0.0262945804018572	C30B5.7 is an ortholog of human OR51J1 (olfactory receptor 51J1 (gene/pseudogene)), OR51F2 (olfactory receptor 51F2) and OR56B1 (olfactory receptor 56B1).
13072	cyp-34A1	T10H4.10	3.79069712326384	1.1425	0.301395749343407	0.0262945804018572	cyp-34A1 is an ortholog of members of the human CYP2 (Cytochrome P4502) family including CYP2D6; cyp-34A1 is predicted to have heme binding activity, iron ion binding activity, and oxidoreductase activity, acting on paired donors, with incorporation or reduction of molecular oxygen, based on protein domain information.
19023	ZK669.5	ZK669.5	3.78881556327989	0.65	0.171557572318804	0.0262945804018572	ZK669.5 is predicted to have GTP binding activity, based on protein domain information.
4773	F07H5.6	F07H5.6	3.78727973416695	1.1075	0.29242624726362	0.0262945804018572	None
3078	rig-5	C36F7.4	3.78546610669751	0.5275	0.13934875788921	0.0262945804018572	rig-5 is an ortholog of human IGLON5 (IgLON family member 5) and members of the IGLON (IgLON cell adhesion molecules) family including NEGR1; rig-5 is expressed in the g1P, g1AR, g1AL, certain interneurons, certain pharyngeal neurons, intestine, and certain head motor neurons.
4014	pgp-10	C54D1.1	3.78386073191914	0.73	0.192924648056418	0.0262945804018572	pgp-10 encodes an ATP-binding protein that is a member of the P-glycoprotein subclass of the ATP-binding cassette (ABC) transporter superfamily; PGP-10 is predicted to function as a transmembrane protein that couples energy to transport of various molecules across membranes, but as loss of pgp-10 activity via RNAi results in no obvious defects, the exact role of pgp-10 in C. elegans development a…
164	tag-38	B0222.4	3.78384285772657	0.645	0.170461624399363	0.0262945804018572	tag-38 is an ortholog of human SGPL1 (sphingosine-1-phosphate lyase 1); tag-38 is predicted to have carboxy-lyase activity and pyridoxal phosphate binding activity, based on protein domain information.
16823	Y53C12A.6	Y53C12A.6	3.78275242769566	0.435	0.114995630381497	0.0262945804018572	None
7375	F39F10.4	F39F10.4	3.7820185850715	1.5925	0.42107143690038	0.0262945804018572	None
16867	Y53F4B.43	Y53F4B.43	3.78193245300458	1.28	0.338451311837443	0.0262945804018572	None
10005	grd-11	K02E2.2	3.78104092858007	0.575	0.152074524148548	0.0262945804018572	grd-11 encodes a hedgehog-like protein, with (from N- to C-terminus) a signal sequence, four Ground domains, an short region of low-complexity sequence, and a Hint/Hog domain; the Hint/Hog domain is predicted to cut GRD-2 into two halves and then covalently link cholesterol to the C-terminus of the Ground domain; the four N-terminal Ground domains are predicted to form one or more cysteine-crossl…
12731	fipr-12	T07C12.13	3.77962828027868	1.0225	0.270529248956886	0.0262945804018572	None
17840	lag-2	Y73C8B.4	3.77896935985979	0.67725	0.179215530878273	0.0262945804018572	lag-2 encodes a transmembrane protein of the Delta/Serrate/Lag-2 (DSL) family that functions as a signaling ligand for the GLP-1 and LIN-12 Notch-like receptors; LAG-2 is required for larval viability and for cell fate decisions involving the germline (meiosis vs mitosis), the somatic gonad, and the early embryo; in addition, LAG-2 functions redundantly with the transmembrane APX-1 and secreted D…
10770	K10H10.12	K10H10.12	3.77838317428727	0.595	0.157474764351352	0.0262945804018572	None
15615	Y37D8A.2	Y37D8A.2	3.77733938794245	0.69	0.182668256445934	0.0262945804018572	Y37D8A.2 is an ortholog of human PLBD2 (phospholipase B domain containing 2).
17326	ttr-16	Y5F2A.1	3.77540826146096	0.7675	0.203289272801189	0.0262945804018572	Transthyretin-like protein 16
3974	ptr-5	C53C11.3	3.77464629736024	0.65	0.172201565072354	0.0262945804018572	ptr-5 encodes a nematode-specific member of the sterol sensing domain (SSD) proteins, distantly paralogous to Drosophila PATCHED (PTC) and human PTCH (OMIM:601309, mutated in basal cell nevus syndrome); PTR-5 is weakly required for normal molting from L4 to adult stages; PTR-5 is also required for normal growth to full size and locomotion; PTR-5 is expressed in head and tail neurons, and in ventr…
[truncated: 6,735 more rows]

## Sheet: +OA
Significant Pos
Row	Gene ID	Gene Name	Score(d)	Numerator(r)	Denominator(s+s0)	q-value(%)	Gene Description
[truncated: 3,566 more rows]

## Sheet: +LA
Significant Pos
[truncated: 4,115 more rows]

## Sheet: +EPA
Significant Pos
[truncated: 4,058 more rows]
